# Supplementary material for: The synthesis of a sterically hindered samarium(ii) bis(amidinate) and conversion to its homoleptic trivalent congener
Source: Royal Society of Chemistry journal article supplement (doi:10.1039/b501447f), 2005-01-01
Supplement: b501447f2.pdf [file b501447f2.pdf]

## Full data

### Compound 1:

Table 1. Crystal data and structure refinement for [Sm(DippForm)<sub>2</sub>(THF)<sub>2</sub>].

|                                   |                                                                                                                                           |
|-----------------------------------|-------------------------------------------------------------------------------------------------------------------------------------------|
| Identification code               | [Sm(DippForm) <sub>2</sub> (THF) <sub>2</sub> ]                                                                                           |
| Empirical formula                 | C <sub>58</sub> H <sub>86</sub> N <sub>4</sub> O <sub>2</sub> Sm                                                                          |
| Formula weight                    | 1021.66                                                                                                                                   |
| Temperature                       | 123(2) K                                                                                                                                  |
| Wavelength                        | 0.71073 Å                                                                                                                                 |
| Crystal system, space group       | Triclinic, P-1                                                                                                                            |
| Unit cell dimensions              | a = 12.1023(2) Å    alpha = 84.4520(10) deg.<br>b = 12.7993(3) Å    beta = 86.800(2) deg.<br>c = 19.6691(5) Å    gamma = 63.9530(10) deg. |
| Volume                            | 2724.19(10) Å <sup>3</sup>                                                                                                                |
| Z, Calculated density             | 2, 1.246 Mg/m <sup>3</sup>                                                                                                                |
| Absorption coefficient            | 1.121 mm <sup>-1</sup>                                                                                                                    |
| F(000)                            | 1080                                                                                                                                      |
| Crystal size                      | 0.10 x 0.10 x 0.05 mm                                                                                                                     |
| Theta range for data collection   | 1.04 to 28.28 deg.                                                                                                                        |
| Limiting indices                  | -16<=h<=16, -14<=k<=16, -25<=l<=25                                                                                                        |
| Reflections collected / unique    | 24871 / 13029 [R(int) = 0.0571]                                                                                                           |
| Completeness to theta = 28.28     | 96.4 %                                                                                                                                    |
| Absorption correction             | empirical                                                                                                                                 |
| Max. and min. transmission        | 0.9461 and 0.8962                                                                                                                         |
| Refinement method                 | Full-matrix least-squares on F <sup>2</sup>                                                                                               |
| Data / restraints / parameters    | 13029 / 0 / 602                                                                                                                           |
| Goodness-of-fit on F <sup>2</sup> | 1.044                                                                                                                                     |
| Final R indices [I>2sigma(I)]     | R1 = 0.0542, wR2 = 0.0904                                                                                                                 |
| R indices (all data)              | R1 = 0.0801, wR2 = 0.0989                                                                                                                 |
| Largest diff. peak and hole       | 1.843 and -1.615 e.Å <sup>-3</sup>                                                                                                        |

Note: All hydrogen atoms placed in calculated positions (riding model)

# Supplementary Material (ESI) for Chemical Communications  
# This journal is © The Royal Society of Chemistry 2005

Table 2. Atomic coordinates ( $\times 10^4$ ) and equivalent isotropic displacement parameters ( $\text{Å}^2 \times 10^3$ ) for  $[\text{Sm}(\text{DippForm})_2(\text{THF})_2]$ .  $U(\text{eq})$  is defined as one third of the trace of the orthogonalized  $U_{ij}$  tensor.

|       | x        | y        | z        | U (eq) |
|-------|----------|----------|----------|--------|
| Sm(1) | 8253(1)  | 7953(1)  | 7404(1)  | 19(1)  |
| O(1)  | 10155(3) | 6944(3)  | 6648(2)  | 45(1)  |
| O(2)  | 9423(2)  | 9202(2)  | 7543(1)  | 35(1)  |
| N(1)  | 6678(3)  | 9822(3)  | 6816(2)  | 24(1)  |
| N(2)  | 6691(3)  | 8152(3)  | 6478(1)  | 22(1)  |
| N(3)  | 7757(3)  | 6522(3)  | 8201(1)  | 20(1)  |
| N(4)  | 8856(3)  | 7329(2)  | 8687(1)  | 19(1)  |
| C(1)  | 6246(3)  | 11048(3) | 6722(2)  | 22(1)  |
| C(2)  | 6828(3)  | 11545(3) | 6250(2)  | 25(1)  |
| C(3)  | 6427(4)  | 12753(3) | 6202(2)  | 29(1)  |
| C(4)  | 5500(4)  | 13447(3) | 6618(2)  | 32(1)  |
| C(5)  | 4946(4)  | 12960(3) | 7087(2)  | 30(1)  |
| C(6)  | 5301(3)  | 11762(3) | 7151(2)  | 26(1)  |
| C(7)  | 7892(4)  | 10795(4) | 5796(2)  | 34(1)  |
| C(8)  | 8999(4)  | 11060(5) | 5806(3)  | 56(1)  |
| C(9)  | 7458(5)  | 10916(5) | 5065(2)  | 53(1)  |
| C(10) | 4697(4)  | 11246(3) | 7695(2)  | 31(1)  |
| C(11) | 5051(4)  | 11362(5) | 8412(2)  | 48(1)  |
| C(12) | 3300(4)  | 11791(4) | 7641(2)  | 42(1)  |
| C(13) | 6228(3)  | 7604(3)  | 6051(2)  | 25(1)  |
| C(14) | 5325(4)  | 7262(3)  | 6317(2)  | 28(1)  |
| C(15) | 4965(4)  | 6608(4)  | 5932(2)  | 37(1)  |
| C(16) | 5442(4)  | 6334(4)  | 5287(2)  | 44(1)  |
| C(17) | 6287(4)  | 6702(4)  | 5020(2)  | 42(1)  |
| C(18) | 6713(4)  | 7330(4)  | 5387(2)  | 32(1)  |
| C(19) | 4728(4)  | 7628(3)  | 7011(2)  | 30(1)  |
| C(20) | 4179(4)  | 6846(4)  | 7364(2)  | 38(1)  |
| C(21) | 3725(4)  | 8893(4)  | 6937(2)  | 40(1)  |
| C(22) | 7682(4)  | 7680(4)  | 5072(2)  | 39(1)  |
| C(23) | 8895(5)  | 6584(5)  | 4964(3)  | 69(2)  |
| C(24) | 7262(6)  | 8426(6)  | 4403(3)  | 71(2)  |
| C(25) | 6293(3)  | 9293(3)  | 6407(2)  | 21(1)  |
| C(26) | 7183(3)  | 5750(3)  | 8299(2)  | 22(1)  |
| C(27) | 6251(3)  | 5934(3)  | 8808(2)  | 24(1)  |
| C(28) | 5732(3)  | 5150(3)  | 8888(2)  | 28(1)  |
| C(29) | 6087(4)  | 4233(3)  | 8480(2)  | 30(1)  |
| C(30) | 6964(3)  | 4086(3)  | 7976(2)  | 28(1)  |
| C(31) | 7522(3)  | 4844(3)  | 7868(2)  | 23(1)  |
| C(32) | 5800(3)  | 6982(3)  | 9235(2)  | 26(1)  |
| C(33) | 5062(4)  | 8121(4)  | 8812(2)  | 41(1)  |
| C(34) | 5069(4)  | 6893(4)  | 9876(2)  | 35(1)  |
| C(35) | 8527(3)  | 4646(3)  | 7333(2)  | 27(1)  |
| C(36) | 8300(4)  | 4252(4)  | 6665(2)  | 44(1)  |
| C(37) | 9771(4)  | 3772(4)  | 7629(2)  | 42(1)  |
| C(38) | 9628(3)  | 7237(3)  | 9230(2)  | 18(1)  |
| C(39) | 9230(3)  | 8153(3)  | 9668(2)  | 22(1)  |
| C(40) | 9971(3)  | 8055(3)  | 10207(2) | 27(1)  |
| C(41) | 11090(4) | 7096(4)  | 10320(2) | 30(1)  |
| C(42) | 11501(3) | 6223(3)  | 9875(2)  | 26(1)  |
| C(43) | 10790(3) | 6278(3)  | 9325(2)  | 20(1)  |
| C(44) | 7992(3)  | 9202(3)  | 9570(2)  | 24(1)  |

# Supplementary Material (ESI) for Chemical Communications  
# This journal is © The Royal Society of Chemistry 2005

|        |           |           |           |        |
|--------|-----------|-----------|-----------|--------|
| C (45) | 8022 (4)  | 10351 (3) | 9685 (2)  | 32 (1) |
| C (46) | 7003 (4)  | 9045 (4)  | 10030 (2) | 36 (1) |
| C (47) | 11307 (3) | 5298 (3)  | 8842 (2)  | 23 (1) |
| C (48) | 12533 (4) | 5189 (4)  | 8522 (2)  | 33 (1) |
| C (49) | 11464 (4) | 4137 (3)  | 9201 (2)  | 31 (1) |
| C (50) | 8413 (3)  | 6546 (3)  | 8711 (2)  | 19 (1) |
| C (51) | 10913 (4) | 5705 (4)  | 6748 (3)  | 53 (1) |
| C (52) | 12116 (4) | 5478 (4)  | 6448 (2)  | 50 (1) |
| C (53) | 11773 (4) | 6364 (4)  | 5822 (2)  | 47 (1) |
| C (54) | 10689 (4) | 7403 (4)  | 6078 (2)  | 46 (1) |
| C (55) | 10669 (4) | 8597 (4)  | 7791 (2)  | 38 (1) |
| C (56) | 10806 (4) | 9372 (4)  | 8284 (2)  | 41 (1) |
| C (57) | 9914 (5)  | 10578 (4) | 7995 (2)  | 45 (1) |
| C (58) | 8862 (4)  | 10370 (4) | 7772 (2)  | 37 (1) |

---

Table 3. Bond lengths [Å] and angles [deg] for [Sm(DippForm)<sub>2</sub>(THF)<sub>2</sub>].

---

|             |          |
|-------------|----------|
| Sm(1)-N(1)  | 2.529(3) |
| Sm(1)-N(3)  | 2.546(3) |
| Sm(1)-O(1)  | 2.560(3) |
| Sm(1)-O(2)  | 2.599(3) |
| Sm(1)-N(2)  | 2.613(3) |
| Sm(1)-N(4)  | 2.617(3) |
| Sm(1)-C(25) | 2.951(4) |
| Sm(1)-C(50) | 2.957(3) |
| O(1)-C(51)  | 1.442(5) |
| O(1)-C(54)  | 1.465(5) |
| O(2)-C(55)  | 1.448(5) |
| O(2)-C(58)  | 1.450(5) |
| N(1)-C(25)  | 1.323(4) |
| N(1)-C(1)   | 1.415(4) |
| N(2)-C(25)  | 1.317(4) |
| N(2)-C(13)  | 1.422(4) |
| N(3)-C(50)  | 1.324(4) |
| N(3)-C(26)  | 1.431(4) |
| N(4)-C(50)  | 1.324(4) |
| N(4)-C(38)  | 1.421(4) |
| C(1)-C(2)   | 1.402(5) |
| C(1)-C(6)   | 1.408(5) |
| C(2)-C(3)   | 1.398(5) |
| C(2)-C(7)   | 1.527(5) |
| C(3)-C(4)   | 1.371(5) |
| C(4)-C(5)   | 1.370(5) |
| C(5)-C(6)   | 1.394(5) |
| C(6)-C(10)  | 1.522(5) |
| C(7)-C(8)   | 1.521(6) |
| C(7)-C(9)   | 1.528(6) |
| C(10)-C(12) | 1.525(6) |
| C(10)-C(11) | 1.535(6) |
| C(13)-C(14) | 1.404(5) |
| C(13)-C(18) | 1.413(5) |
| C(14)-C(15) | 1.394(5) |
| C(14)-C(19) | 1.524(5) |
| C(15)-C(16) | 1.375(6) |
| C(16)-C(17) | 1.364(6) |
| C(17)-C(18) | 1.396(6) |
| C(18)-C(22) | 1.512(6) |
| C(19)-C(20) | 1.524(5) |
| C(19)-C(21) | 1.538(6) |
| C(22)-C(24) | 1.518(7) |
| C(22)-C(23) | 1.544(7) |
| C(26)-C(31) | 1.402(5) |
| C(26)-C(27) | 1.419(5) |
| C(27)-C(28) | 1.392(5) |
| C(27)-C(32) | 1.525(5) |
| C(28)-C(29) | 1.381(5) |
| C(29)-C(30) | 1.374(5) |
| C(30)-C(31) | 1.401(5) |
| C(31)-C(35) | 1.513(5) |
| C(32)-C(33) | 1.523(6) |
| C(32)-C(34) | 1.523(5) |
| C(35)-C(36) | 1.531(5) |
| C(35)-C(37) | 1.533(6) |
| C(38)-C(43) | 1.409(5) |

# Supplementary Material (ESI) for Chemical Communications  
# This journal is © The Royal Society of Chemistry 2005

|                |           |
|----------------|-----------|
| C (38) -C (39) | 1.414 (5) |
| C (39) -C (40) | 1.388 (5) |
| C (39) -C (44) | 1.517 (5) |
| C (40) -C (41) | 1.382 (5) |
| C (41) -C (42) | 1.383 (5) |
| C (42) -C (43) | 1.396 (5) |
| C (43) -C (47) | 1.532 (5) |
| C (44) -C (45) | 1.527 (5) |
| C (44) -C (46) | 1.532 (5) |
| C (47) -C (49) | 1.518 (5) |
| C (47) -C (48) | 1.533 (5) |
| C (51) -C (52) | 1.455 (6) |
| C (52) -C (53) | 1.532 (7) |
| C (53) -C (54) | 1.505 (6) |
| C (55) -C (56) | 1.516 (6) |
| C (56) -C (57) | 1.519 (7) |
| C (57) -C (58) | 1.505 (6) |

|                        |             |
|------------------------|-------------|
| N (1) -Sm (1) -N (3)   | 125.17 (10) |
| N (1) -Sm (1) -O (1)   | 112.24 (10) |
| N (3) -Sm (1) -O (1)   | 112.94 (9)  |
| N (1) -Sm (1) -O (2)   | 83.68 (9)   |
| N (3) -Sm (1) -O (2)   | 134.07 (9)  |
| O (1) -Sm (1) -O (2)   | 79.12 (9)   |
| N (1) -Sm (1) -N (2)   | 52.92 (9)   |
| N (3) -Sm (1) -N (2)   | 94.15 (9)   |
| O (1) -Sm (1) -N (2)   | 94.55 (10)  |
| O (2) -Sm (1) -N (2)   | 130.20 (9)  |
| N (1) -Sm (1) -N (4)   | 131.96 (9)  |
| N (3) -Sm (1) -N (4)   | 52.89 (9)   |
| O (1) -Sm (1) -N (4)   | 109.15 (9)  |
| O (2) -Sm (1) -N (4)   | 81.18 (9)   |
| N (2) -Sm (1) -N (4)   | 144.63 (9)  |
| N (1) -Sm (1) -C (25)  | 26.52 (9)   |
| N (3) -Sm (1) -C (25)  | 112.49 (9)  |
| O (1) -Sm (1) -C (25)  | 103.31 (10) |
| O (2) -Sm (1) -C (25)  | 106.67 (9)  |
| N (2) -Sm (1) -C (25)  | 26.49 (9)   |
| N (4) -Sm (1) -C (25)  | 147.52 (9)  |
| N (1) -Sm (1) -C (50)  | 136.51 (9)  |
| N (3) -Sm (1) -C (50)  | 26.52 (9)   |
| O (1) -Sm (1) -C (50)  | 111.12 (9)  |
| O (2) -Sm (1) -C (50)  | 107.64 (9)  |
| N (2) -Sm (1) -C (50)  | 120.36 (9)  |
| N (4) -Sm (1) -C (50)  | 26.59 (9)   |
| C (25) -Sm (1) -C (50) | 134.93 (9)  |
| C (51) -O (1) -C (54)  | 107.6 (3)   |
| C (51) -O (1) -Sm (1)  | 121.0 (3)   |
| C (54) -O (1) -Sm (1)  | 131.5 (2)   |
| C (55) -O (2) -C (58)  | 109.0 (3)   |
| C (55) -O (2) -Sm (1)  | 117.3 (2)   |
| C (58) -O (2) -Sm (1)  | 124.6 (2)   |
| C (25) -N (1) -C (1)   | 119.3 (3)   |
| C (25) -N (1) -Sm (1)  | 94.8 (2)    |
| C (1) -N (1) -Sm (1)   | 145.1 (2)   |
| C (25) -N (2) -C (13)  | 119.8 (3)   |
| C (25) -N (2) -Sm (1)  | 91.3 (2)    |
| C (13) -N (2) -Sm (1)  | 148.7 (2)   |
| C (50) -N (3) -C (26)  | 117.3 (3)   |
| C (50) -N (3) -Sm (1)  | 94.3 (2)    |
| C (26) -N (3) -Sm (1)  | 148.3 (2)   |

# Supplementary Material (ESI) for Chemical Communications  
# This journal is © The Royal Society of Chemistry 2005

|                        |            |
|------------------------|------------|
| C (50) -N (4) -C (38)  | 116.9 (3)  |
| C (50) -N (4) -Sm (1)  | 91.2 (2)   |
| C (38) -N (4) -Sm (1)  | 148.5 (2)  |
| C (2) -C (1) -C (6)    | 119.8 (3)  |
| C (2) -C (1) -N (1)    | 120.6 (3)  |
| C (6) -C (1) -N (1)    | 119.3 (3)  |
| C (3) -C (2) -C (1)    | 119.0 (3)  |
| C (3) -C (2) -C (7)    | 119.6 (3)  |
| C (1) -C (2) -C (7)    | 121.4 (3)  |
| C (4) -C (3) -C (2)    | 120.9 (4)  |
| C (5) -C (4) -C (3)    | 120.1 (4)  |
| C (4) -C (5) -C (6)    | 121.2 (3)  |
| C (5) -C (6) -C (1)    | 118.8 (3)  |
| C (5) -C (6) -C (10)   | 119.8 (3)  |
| C (1) -C (6) -C (10)   | 121.3 (3)  |
| C (8) -C (7) -C (2)    | 113.1 (4)  |
| C (8) -C (7) -C (9)    | 110.7 (4)  |
| C (2) -C (7) -C (9)    | 110.3 (3)  |
| C (6) -C (10) -C (12)  | 113.1 (3)  |
| C (6) -C (10) -C (11)  | 110.5 (3)  |
| C (12) -C (10) -C (11) | 109.8 (3)  |
| C (14) -C (13) -C (18) | 119.7 (3)  |
| C (14) -C (13) -N (2)  | 118.7 (3)  |
| C (18) -C (13) -N (2)  | 121.5 (3)  |
| C (15) -C (14) -C (13) | 119.2 (4)  |
| C (15) -C (14) -C (19) | 120.6 (4)  |
| C (13) -C (14) -C (19) | 120.2 (3)  |
| C (16) -C (15) -C (14) | 121.2 (4)  |
| C (17) -C (16) -C (15) | 119.4 (4)  |
| C (16) -C (17) -C (18) | 122.2 (4)  |
| C (17) -C (18) -C (13) | 118.3 (4)  |
| C (17) -C (18) -C (22) | 119.6 (4)  |
| C (13) -C (18) -C (22) | 122.1 (4)  |
| C (20) -C (19) -C (14) | 114.4 (3)  |
| C (20) -C (19) -C (21) | 109.3 (3)  |
| C (14) -C (19) -C (21) | 109.7 (3)  |
| C (18) -C (22) -C (24) | 111.9 (4)  |
| C (18) -C (22) -C (23) | 110.1 (4)  |
| C (24) -C (22) -C (23) | 110.5 (4)  |
| N (2) -C (25) -N (1)   | 120.6 (3)  |
| N (2) -C (25) -Sm (1)  | 62.25 (19) |
| N (1) -C (25) -Sm (1)  | 58.65 (18) |
| C (31) -C (26) -C (27) | 120.9 (3)  |
| C (31) -C (26) -N (3)  | 118.9 (3)  |
| C (27) -C (26) -N (3)  | 120.2 (3)  |
| C (28) -C (27) -C (26) | 117.9 (3)  |
| C (28) -C (27) -C (32) | 121.0 (3)  |
| C (26) -C (27) -C (32) | 121.0 (3)  |
| C (29) -C (28) -C (27) | 121.6 (3)  |
| C (30) -C (29) -C (28) | 119.9 (4)  |
| C (29) -C (30) -C (31) | 121.4 (4)  |
| C (30) -C (31) -C (26) | 118.2 (3)  |
| C (30) -C (31) -C (35) | 121.0 (3)  |
| C (26) -C (31) -C (35) | 120.6 (3)  |
| C (33) -C (32) -C (34) | 109.6 (3)  |
| C (33) -C (32) -C (27) | 111.8 (3)  |
| C (34) -C (32) -C (27) | 114.7 (3)  |
| C (31) -C (35) -C (36) | 114.2 (3)  |
| C (31) -C (35) -C (37) | 109.8 (3)  |
| C (36) -C (35) -C (37) | 110.5 (3)  |
| C (43) -C (38) -C (39) | 119.8 (3)  |

# Supplementary Material (ESI) for Chemical Communications  
# This journal is © The Royal Society of Chemistry 2005

|                        |            |
|------------------------|------------|
| C (43) -C (38) -N (4)  | 121.5 (3)  |
| C (39) -C (38) -N (4)  | 118.7 (3)  |
| C (40) -C (39) -C (38) | 118.8 (3)  |
| C (40) -C (39) -C (44) | 120.4 (3)  |
| C (38) -C (39) -C (44) | 120.7 (3)  |
| C (41) -C (40) -C (39) | 121.7 (3)  |
| C (40) -C (41) -C (42) | 119.4 (4)  |
| C (41) -C (42) -C (43) | 121.1 (4)  |
| C (42) -C (43) -C (38) | 119.0 (3)  |
| C (42) -C (43) -C (47) | 118.7 (3)  |
| C (38) -C (43) -C (47) | 122.3 (3)  |
| C (39) -C (44) -C (45) | 113.2 (3)  |
| C (39) -C (44) -C (46) | 111.1 (3)  |
| C (45) -C (44) -C (46) | 110.0 (3)  |
| C (49) -C (47) -C (43) | 111.8 (3)  |
| C (49) -C (47) -C (48) | 110.2 (3)  |
| C (43) -C (47) -C (48) | 110.8 (3)  |
| N (3) -C (50) -N (4)   | 120.6 (3)  |
| N (3) -C (50) -Sm (1)  | 59.14 (18) |
| N (4) -C (50) -Sm (1)  | 62.25 (18) |
| O (1) -C (51) -C (52)  | 107.2 (4)  |
| C (51) -C (52) -C (53) | 101.7 (4)  |
| C (54) -C (53) -C (52) | 102.8 (3)  |
| O (1) -C (54) -C (53)  | 106.0 (4)  |
| O (2) -C (55) -C (56)  | 106.3 (3)  |
| C (55) -C (56) -C (57) | 101.8 (3)  |
| C (58) -C (57) -C (56) | 102.4 (4)  |
| O (2) -C (58) -C (57)  | 105.4 (4)  |

---

Symmetry transformations used to generate equivalent atoms:

Table 4. Anisotropic displacement parameters ( $\text{Å}^2 \times 10^3$ ) for  
 [Sm(DippForm)<sub>2</sub>(THF)<sub>2</sub>].

The anisotropic displacement factor exponent takes the form:

$$-2 \pi^2 [ h^2 a^2 U_{11} + \dots + 2 h k a^* b^* U_{12} ]$$

|       | U11   | U22   | U33   | U23    | U13    | U12    |
|-------|-------|-------|-------|--------|--------|--------|
| Sm(1) | 23(1) | 14(1) | 21(1) | 1(1)   | -3(1)  | -8(1)  |
| O(1)  | 44(2) | 28(2) | 57(2) | -1(2)  | 7(2)   | -12(1) |
| O(2)  | 38(2) | 24(2) | 48(2) | 1(1)   | -11(1) | -19(1) |
| N(1)  | 30(2) | 13(2) | 25(2) | -1(1)  | -3(1)  | -3(1)  |
| N(2)  | 29(2) | 15(2) | 23(2) | -1(1)  | -7(1)  | -9(1)  |
| N(3)  | 24(2) | 18(2) | 20(1) | -2(1)  | 0(1)   | -12(1) |
| N(4)  | 21(2) | 16(2) | 20(1) | -1(1)  | -2(1)  | -9(1)  |
| C(1)  | 26(2) | 16(2) | 23(2) | 0(2)   | -4(2)  | -7(2)  |
| C(2)  | 25(2) | 24(2) | 24(2) | 1(2)   | -2(2)  | -7(2)  |
| C(3)  | 36(2) | 22(2) | 28(2) | 3(2)   | -1(2)  | -13(2) |
| C(4)  | 45(2) | 16(2) | 35(2) | -4(2)  | -2(2)  | -13(2) |
| C(5)  | 33(2) | 18(2) | 33(2) | -7(2)  | 4(2)   | -4(2)  |
| C(6)  | 29(2) | 22(2) | 26(2) | -4(2)  | -1(2)  | -10(2) |
| C(7)  | 33(2) | 25(2) | 34(2) | -2(2)  | 7(2)   | -3(2)  |
| C(8)  | 34(3) | 77(4) | 52(3) | -21(3) | 13(2)  | -18(3) |
| C(9)  | 51(3) | 63(3) | 40(3) | -22(2) | 13(2)  | -19(3) |
| C(10) | 34(2) | 21(2) | 38(2) | -6(2)  | 11(2)  | -12(2) |
| C(11) | 46(3) | 64(3) | 36(2) | 11(2)  | -1(2)  | -29(3) |
| C(12) | 38(2) | 52(3) | 38(2) | -9(2)  | 7(2)   | -22(2) |
| C(13) | 28(2) | 16(2) | 30(2) | 0(2)   | -11(2) | -6(2)  |
| C(14) | 31(2) | 17(2) | 35(2) | 5(2)   | -14(2) | -9(2)  |
| C(15) | 39(2) | 28(2) | 48(3) | 1(2)   | -16(2) | -17(2) |
| C(16) | 56(3) | 34(3) | 50(3) | -13(2) | -17(2) | -25(2) |
| C(17) | 49(3) | 36(3) | 37(2) | -14(2) | -10(2) | -14(2) |
| C(18) | 36(2) | 26(2) | 31(2) | -7(2)  | -7(2)  | -8(2)  |
| C(19) | 35(2) | 25(2) | 33(2) | 6(2)   | -10(2) | -17(2) |
| C(20) | 41(2) | 35(2) | 43(2) | 12(2)  | -11(2) | -23(2) |
| C(21) | 40(2) | 32(2) | 43(2) | 3(2)   | 3(2)   | -15(2) |
| C(22) | 46(3) | 42(3) | 29(2) | -14(2) | 4(2)   | -19(2) |
| C(23) | 46(3) | 63(4) | 88(4) | -29(3) | 9(3)   | -13(3) |
| C(24) | 86(4) | 87(5) | 53(3) | 20(3)  | -16(3) | -53(4) |
| C(25) | 21(2) | 15(2) | 23(2) | 1(2)   | -2(2)  | -4(2)  |
| C(26) | 24(2) | 17(2) | 24(2) | 4(2)   | -7(2)  | -9(2)  |
| C(27) | 26(2) | 23(2) | 24(2) | 5(2)   | -6(2)  | -13(2) |
| C(28) | 28(2) | 29(2) | 30(2) | 6(2)   | -4(2)  | -16(2) |
| C(29) | 32(2) | 27(2) | 38(2) | 5(2)   | -7(2)  | -21(2) |
| C(30) | 33(2) | 19(2) | 36(2) | 1(2)   | -7(2)  | -15(2) |
| C(31) | 26(2) | 16(2) | 27(2) | 4(2)   | -6(2)  | -10(2) |
| C(32) | 28(2) | 25(2) | 26(2) | -1(2)  | 1(2)   | -13(2) |
| C(33) | 55(3) | 25(2) | 37(2) | -4(2)  | 1(2)   | -11(2) |
| C(34) | 34(2) | 32(2) | 35(2) | -3(2)  | 6(2)   | -10(2) |
| C(35) | 31(2) | 18(2) | 35(2) | -4(2)  | 0(2)   | -13(2) |
| C(36) | 46(3) | 50(3) | 43(3) | -18(2) | 7(2)   | -25(2) |
| C(37) | 30(2) | 37(3) | 57(3) | -4(2)  | 0(2)   | -13(2) |
| C(38) | 23(2) | 19(2) | 16(2) | 0(1)   | 2(1)   | -13(2) |
| C(39) | 24(2) | 19(2) | 22(2) | -1(2)  | 2(2)   | -11(2) |
| C(40) | 34(2) | 26(2) | 24(2) | -7(2)  | -2(2)  | -14(2) |
| C(41) | 32(2) | 35(2) | 27(2) | -3(2)  | -7(2)  | -16(2) |
| C(42) | 23(2) | 25(2) | 30(2) | 2(2)   | -5(2)  | -9(2)  |
| C(43) | 20(2) | 20(2) | 22(2) | 0(2)   | 2(2)   | -10(2) |



# Supplementary Material (ESI) for Chemical Communications  
# This journal is © The Royal Society of Chemistry 2005

|        |        |        |        |        |        |         |
|--------|--------|--------|--------|--------|--------|---------|
| C (44) | 27 (2) | 17 (2) | 26 (2) | -5 (2) | -1 (2) | -8 (2)  |
| C (45) | 32 (2) | 21 (2) | 42 (2) | -8 (2) | -1 (2) | -9 (2)  |
| C (46) | 30 (2) | 28 (2) | 49 (3) | -7 (2) | 5 (2)  | -12 (2) |
| C (47) | 21 (2) | 21 (2) | 23 (2) | -2 (2) | 3 (2)  | -6 (2)  |
| C (48) | 31 (2) | 28 (2) | 37 (2) | -5 (2) | 9 (2)  | -10 (2) |
| C (49) | 38 (2) | 22 (2) | 33 (2) | -4 (2) | 3 (2)  | -13 (2) |
| C (50) | 22 (2) | 14 (2) | 18 (2) | 0 (1)  | 0 (1)  | -6 (2)  |
| C (51) | 51 (3) | 37 (3) | 64 (3) | -6 (2) | 8 (3)  | -12 (2) |
| C (52) | 47 (3) | 41 (3) | 49 (3) | -7 (2) | 5 (2)  | -8 (2)  |
| C (53) | 40 (3) | 60 (3) | 43 (3) | -5 (2) | 6 (2)  | -24 (2) |
| C (54) | 52 (3) | 41 (3) | 48 (3) | -1 (2) | 4 (2)  | -23 (2) |
| C (55) | 30 (2) | 40 (3) | 47 (3) | 2 (2)  | -4 (2) | -17 (2) |
| C (56) | 38 (2) | 60 (3) | 35 (2) | -2 (2) | -3 (2) | -31 (2) |
| C (57) | 67 (3) | 45 (3) | 38 (2) | 0 (2)  | -7 (2) | -39 (3) |
| C (58) | 52 (3) | 28 (2) | 34 (2) | 0 (2)  | -7 (2) | -18 (2) |

---

Table 5. Hydrogen coordinates ( $\times 10^4$ ) and isotropic displacement parameters ( $\text{Å}^2 \times 10^3$ ) for  $[\text{Sm}(\text{DippForm})_2(\text{THF})_2]$ .

|        | x     | y     | z     | U (eq) |
|--------|-------|-------|-------|--------|
| H(3)   | 6804  | 13099 | 5877  | 35     |
| H(4)   | 5240  | 14266 | 6580  | 38     |
| H(5)   | 4308  | 13449 | 7375  | 36     |
| H(7)   | 8163  | 9962  | 5975  | 41     |
| H(8A)  | 8774  | 11859 | 5610  | 84     |
| H(8B)  | 9674  | 10512 | 5537  | 84     |
| H(8C)  | 9261  | 10979 | 6279  | 84     |
| H(9A)  | 6772  | 10704 | 5067  | 79     |
| H(9B)  | 8137  | 10398 | 4785  | 79     |
| H(9C)  | 7185  | 11725 | 4875  | 79     |
| H(10)  | 5019  | 10395 | 7633  | 38     |
| H(11A) | 5950  | 10998 | 8447  | 72     |
| H(11B) | 4709  | 10973 | 8754  | 72     |
| H(11C) | 4723  | 12190 | 8492  | 72     |
| H(12A) | 2959  | 12626 | 7703  | 63     |
| H(12B) | 2964  | 11412 | 7995  | 63     |
| H(12C) | 3079  | 11685 | 7189  | 63     |
| H(15)  | 4380  | 6348  | 6118  | 44     |
| H(16)  | 5184  | 5892  | 5029  | 53     |
| H(17)  | 6597  | 6525  | 4570  | 50     |
| H(19)  | 5375  | 7605  | 7315  | 36     |
| H(20A) | 3486  | 6912  | 7099  | 57     |
| H(20B) | 3889  | 7089  | 7824  | 57     |
| H(20C) | 4807  | 6035  | 7397  | 57     |
| H(21A) | 3064  | 8937  | 6652  | 59     |
| H(21B) | 4080  | 9401  | 6721  | 59     |
| H(21C) | 3390  | 9146  | 7389  | 59     |
| H(22)  | 7839  | 8150  | 5398  | 46     |
| H(23A) | 9176  | 6134  | 5403  | 103    |
| H(23B) | 9522  | 6821  | 4768  | 103    |
| H(23C) | 8759  | 6103  | 4651  | 103    |
| H(24A) | 7039  | 8005  | 4087  | 106    |
| H(24B) | 7930  | 8596  | 4202  | 106    |
| H(24C) | 6545  | 9159  | 4489  | 106    |
| H(25)  | 5724  | 9740  | 6058  | 25     |
| H(28)  | 5120  | 5248  | 9233  | 34     |
| H(29)  | 5725  | 3705  | 8548  | 36     |
| H(30)  | 7195  | 3459  | 7694  | 33     |
| H(32)  | 6549  | 7029  | 9390  | 31     |
| H(33A) | 5548  | 8192  | 8410  | 62     |
| H(33B) | 4862  | 8779  | 9090  | 62     |
| H(33C) | 4299  | 8126  | 8665  | 62     |
| H(34A) | 4275  | 6946  | 9746  | 53     |
| H(34B) | 4931  | 7532  | 10157 | 53     |
| H(34C) | 5530  | 6145  | 10137 | 53     |
| H(35)  | 8571  | 5405  | 7221  | 33     |
| H(36A) | 8354  | 3464  | 6746  | 66     |
| H(36B) | 8923  | 4250  | 6323  | 66     |
| H(36C) | 7480  | 4791  | 6497  | 66     |
| H(37A) | 9941  | 4075  | 8030  | 63     |
| H(37B) | 10421 | 3659  | 7284  | 63     |

# Supplementary Material (ESI) for Chemical Communications  
# This journal is © The Royal Society of Chemistry 2005

|         |       |       |       |    |
|---------|-------|-------|-------|----|
| H (37C) | 9748  | 3025  | 7764  | 63 |
| H (40)  | 9703  | 8662  | 10507 | 32 |
| H (41)  | 11572 | 7036  | 10699 | 36 |
| H (42)  | 12281 | 5575  | 9944  | 32 |
| H (44)  | 7749  | 9254  | 9085  | 28 |
| H (45A) | 8112  | 10385 | 10174 | 48 |
| H (45B) | 7255  | 11004 | 9525  | 48 |
| H (45C) | 8719  | 10402 | 9431  | 48 |
| H (46A) | 6977  | 8314  | 9945  | 54 |
| H (46B) | 6200  | 9700  | 9929  | 54 |
| H (46C) | 7199  | 9020  | 10509 | 54 |
| H (47)  | 10708 | 5502  | 8465  | 28 |
| H (48A) | 13142 | 4970  | 8881  | 50 |
| H (48B) | 12418 | 5939  | 8285  | 50 |
| H (48C) | 12824 | 4589  | 8195  | 50 |
| H (49A) | 12039 | 3923  | 9578  | 47 |
| H (49B) | 11787 | 3535  | 8876  | 47 |
| H (49C) | 10665 | 4206  | 9382  | 47 |
| H (50)  | 8567  | 5997  | 9097  | 22 |
| H (51A) | 10546 | 5276  | 6523  | 64 |
| H (51B) | 10988 | 5448  | 7241  | 64 |
| H (52A) | 12555 | 4668  | 6314  | 60 |
| H (52B) | 12631 | 5622  | 6766  | 60 |
| H (53A) | 12460 | 6562  | 5677  | 57 |
| H (53B) | 11544 | 6063  | 5435  | 57 |
| H (54A) | 10957 | 7967  | 6233  | 56 |
| H (54B) | 10079 | 7800  | 5712  | 56 |
| H (55A) | 11268 | 8470  | 7407  | 46 |
| H (55B) | 10812 | 7831  | 8027  | 46 |
| H (56A) | 11658 | 9291  | 8280  | 50 |
| H (56B) | 10569 | 9196  | 8756  | 50 |
| H (57A) | 9645  | 11146 | 8348  | 53 |
| H (57B) | 10285 | 10864 | 7603  | 53 |
| H (58A) | 8283  | 10424 | 8158  | 45 |
| H (58B) | 8410  | 10950 | 7396  | 45 |

---

**Full data**

**Compound 2:**

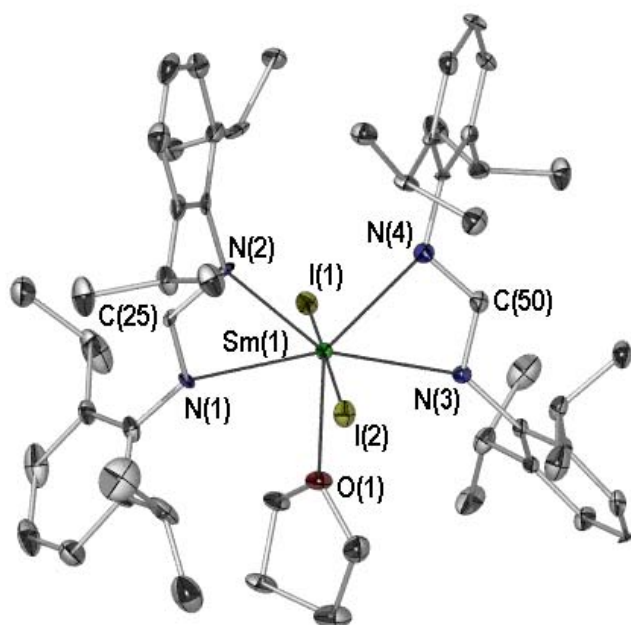

**Figure.** Molecular structure of the anion of compound **2**, POV-Ray illustration with 40% thermal ellipsoids. All hydrogen atoms omitted for clarity.

# Supplementary Material (ESI) for Chemical Communications  
# This journal is © The Royal Society of Chemistry 2005

Table 1. Crystal data and structure refinement for  
[Na(THF)5][Sm(I)2(DippForm)2(THF)].

|                                   |                                                                                                                           |
|-----------------------------------|---------------------------------------------------------------------------------------------------------------------------|
| Identification code               | Na(THF)5][Sm(I)2(DippForm)2(THF)]                                                                                         |
| Empirical formula                 | C148 H236 I4 N8 Na2 O12 Sm2                                                                                               |
| Formula weight                    | 3173.73                                                                                                                   |
| Temperature                       | 123(2) K                                                                                                                  |
| Wavelength                        | 0.71073 Å                                                                                                                 |
| Crystal system, space group       | Monoclinic, P2(1)/c                                                                                                       |
| Unit cell dimensions              | a = 26.7632(3) Å    alpha = 90 deg.<br>b = 14.3697(2) Å    beta = 91.7860(10) deg.<br>c = 41.5794(5) Å    gamma = 90 deg. |
| Volume                            | 15982.8(3) Å <sup>3</sup>                                                                                                 |
| Z, Calculated density             | 4, 1.319 Mg/m <sup>3</sup>                                                                                                |
| Absorption coefficient            | 1.560 mm <sup>-1</sup>                                                                                                    |
| F(000)                            | 6536                                                                                                                      |
| Crystal size                      | 0.30 x 0.30 x 0.10 mm                                                                                                     |
| Theta range for data collection   | 1.22 to 28.30 deg.                                                                                                        |
| Limiting indices                  | -35<=h<=32, -18<=k<=18, -52<=l<=55                                                                                        |
| Reflections collected / unique    | 61917 / 30037 [R(int) = 0.0572]                                                                                           |
| Completeness to theta = 26.00     | 79.8 %                                                                                                                    |
| Absorption correction             | empirical                                                                                                                 |
| Max. and min. transmission        | 0.8596 and 0.6518                                                                                                         |
| Refinement method                 | Full-matrix-block least-squares on F <sup>2</sup>                                                                         |
| Data / restraints / parameters    | 30037 / 0 / 1618                                                                                                          |
| Goodness-of-fit on F <sup>2</sup> | 1.031                                                                                                                     |
| Final R indices [I>2sigma(I)]     | R1 = 0.0603, wR2 = 0.1742                                                                                                 |
| R indices (all data)              | R1 = 0.1324, wR2 = 0.2321                                                                                                 |
| Largest diff. peak and hole       | 2.369 and -1.989 e.Å <sup>-3</sup>                                                                                        |
| Note:                             | All hydrogen atoms placed in calculated positions (riding model).                                                         |

Table 2. Atomic coordinates ( $\times 10^4$ ) and equivalent isotropic displacement parameters ( $\text{Å}^2 \times 10^3$ ) for [Na(THF)<sub>5</sub>][Sm(I)<sub>2</sub>(DippForm)<sub>2</sub>(THF)]. U(eq) is defined as one third of the trace of the orthogonalized U<sub>ij</sub> tensor.

|        | x        | y         | z        | U (eq) |
|--------|----------|-----------|----------|--------|
| Sm(1)  | 3668 (1) | 9658 (1)  | 1425 (1) | 17     |
| Sm(2)  | 8674 (1) | 10160 (1) | 1416 (1) | 16     |
| I (1)  | 2739 (1) | 8516 (1)  | 1187 (1) | 26     |
| I (2)  | 4569 (1) | 10744 (1) | 1726 (1) | 27     |
| I (3)  | 7729 (1) | 11364 (1) | 1264 (1) | 23     |
| I (4)  | 9611 (1) | 9054 (1)  | 1643 (1) | 31     |
| Na (1) | 4019 (1) | 9179 (2)  | 3764 (1) | 27     |
| Na (2) | 9073 (1) | 10719 (3) | 3811 (1) | 44     |
| O (1)  | 3298 (2) | 9504 (4)  | 1964 (2) | 29     |
| O (2)  | 3267 (2) | 10000 (4) | 3785 (2) | 38     |
| O (3)  | 3747 (2) | 8183 (4)  | 4159 (2) | 43     |
| O (4)  | 4455 (2) | 10045 (4) | 4156 (2) | 37     |
| O (5)  | 4496 (2) | 9946 (4)  | 3382 (2) | 37     |
| O (6)  | 3867 (2) | 8031 (4)  | 3374 (2) | 36     |
| O (7)  | 8356 (2) | 10064 (4) | 1974 (1) | 28     |
| O (8)  | 8321 (3) | 9946 (5)  | 3779 (2) | 54     |
| O (9)  | 8868 (3) | 11831 (5) | 3438 (2) | 60     |
| O (10) | 8871 (3) | 11709 (6) | 4221 (2) | 78     |
| O (11) | 9551 (3) | 9796 (4)  | 4161 (2) | 55     |
| O (12) | 9542 (3) | 10102 (6) | 3381 (2) | 72     |
| N (1)  | 3138 (2) | 11095 (4) | 1458 (2) | 17     |
| N (2)  | 3599 (2) | 10899 (4) | 1019 (2) | 17     |
| N (3)  | 4107 (2) | 8197 (4)  | 1616 (2) | 17     |
| N (4)  | 4159 (2) | 8594 (5)  | 1081 (2) | 22     |
| N (5)  | 8151 (2) | 8699 (4)  | 1394 (2) | 18     |
| N (6)  | 8570 (2) | 9118 (4)  | 947 (2)  | 16     |
| N (7)  | 9105 (2) | 11565 (4) | 1658 (2) | 17     |
| N (8)  | 9143 (2) | 11333 (4) | 1107 (2) | 18     |
| C (1)  | 2770 (3) | 11550 (5) | 1626 (2) | 24     |
| C (2)  | 2896 (3) | 11994 (6) | 1911 (2) | 25     |
| C (3)  | 2530 (3) | 12392 (6) | 2109 (3) | 40     |
| C (4)  | 2033 (4) | 12338 (7) | 2009 (3) | 51     |
| C (5)  | 1897 (3) | 11881 (6) | 1702 (3) | 49     |
| C (6)  | 2261 (3) | 11485 (6) | 1515 (2) | 25     |
| C (7)  | 3434 (3) | 12157 (7) | 2009 (2) | 40     |
| C (8)  | 3542 (4) | 12131 (7) | 2379 (3) | 58     |
| C (9)  | 3625 (4) | 13024 (8) | 1861 (3) | 65     |
| C (10) | 2087 (3) | 11020 (6) | 1213 (2) | 29     |
| C (11) | 1658 (3) | 10345 (7) | 1248 (3) | 55     |
| C (12) | 1927 (4) | 11736 (7) | 953 (3)  | 43     |
| C (13) | 3765 (3) | 11290 (5) | 727 (2)  | 21     |
| C (14) | 3646 (3) | 10814 (6) | 430 (2)  | 28     |
| C (15) | 3812 (3) | 11164 (6) | 141 (2)  | 36     |
| C (16) | 4094 (3) | 12010 (7) | 143 (3)  | 46     |
| C (17) | 4199 (3) | 12465 (6) | 430 (3)  | 36     |
| C (18) | 4048 (3) | 12114 (6) | 732 (2)  | 30     |
| C (19) | 3310 (3) | 9991 (6)  | 422 (2)  | 31     |
| C (20) | 3374 (4) | 9352 (6)  | 140 (2)  | 38     |
| C (21) | 2757 (3) | 10294 (7) | 452 (2)  | 39     |

# Supplementary Material (ESI) for Chemical Communications  
# This journal is © The Royal Society of Chemistry 2005

|        |          |           |          |    |
|--------|----------|-----------|----------|----|
| C (22) | 4187 (3) | 12639 (5) | 1040 (2) | 30 |
| C (23) | 4757 (3) | 12756 (6) | 1084 (3) | 43 |
| C (24) | 3928 (4) | 13604 (6) | 1052 (3) | 49 |
| C (25) | 3269 (3) | 11388 (5) | 1182 (2) | 17 |
| C (26) | 4271 (3) | 7651 (5)  | 1882 (2) | 20 |
| C (27) | 3919 (3) | 7071 (5)  | 2034 (2) | 20 |
| C (28) | 4066 (3) | 6560 (6)  | 2301 (2) | 30 |
| C (29) | 4550 (3) | 6637 (6)  | 2422 (2) | 28 |
| C (30) | 4885 (3) | 7183 (5)  | 2273 (2) | 24 |
| C (31) | 4759 (3) | 7698 (5)  | 2005 (2) | 20 |
| C (32) | 3385 (3) | 6974 (6)  | 1892 (2) | 28 |
| C (33) | 2981 (3) | 6768 (7)  | 2131 (2) | 42 |
| C (34) | 3386 (4) | 6218 (7)  | 1624 (3) | 52 |
| C (35) | 5165 (3) | 8286 (6)  | 1843 (2) | 25 |
| C (36) | 5470 (3) | 8852 (6)  | 2086 (3) | 41 |
| C (37) | 5512 (3) | 7675 (6)  | 1666 (2) | 35 |
| C (38) | 4303 (3) | 8345 (5)  | 767 (2)  | 16 |
| C (39) | 4652 (3) | 8918 (6)  | 612 (2)  | 22 |
| C (40) | 4789 (3) | 8681 (6)  | 303 (2)  | 28 |
| C (41) | 4596 (3) | 7909 (6)  | 139 (2)  | 28 |
| C (42) | 4258 (3) | 7349 (6)  | 300 (2)  | 27 |
| C (43) | 4101 (3) | 7552 (6)  | 602 (2)  | 23 |
| C (44) | 4897 (3) | 9744 (6)  | 790 (2)  | 23 |
| C (45) | 5062 (3) | 10510 (6) | 560 (2)  | 31 |
| C (46) | 5329 (3) | 9399 (7)  | 1004 (2) | 36 |
| C (47) | 3701 (3) | 6923 (5)  | 748 (2)  | 23 |
| C (48) | 3227 (3) | 6831 (6)  | 537 (2)  | 36 |
| C (49) | 3912 (3) | 5969 (6)  | 817 (2)  | 38 |
| C (50) | 4276 (3) | 8012 (6)  | 1324 (2) | 20 |
| C (51) | 3569 (3) | 9452 (7)  | 2283 (2) | 38 |
| C (52) | 3173 (4) | 9427 (8)  | 2547 (3) | 49 |
| C (53) | 2707 (3) | 9795 (7)  | 2354 (2) | 39 |
| C (54) | 2756 (3) | 9441 (6)  | 2015 (2) | 29 |
| C (55) | 3215 (4) | 10642 (6) | 4043 (3) | 54 |
| C (56) | 2644 (4) | 10648 (6) | 4119 (3) | 51 |
| C (57) | 2405 (4) | 10462 (7) | 3780 (3) | 42 |
| C (58) | 2774 (4) | 9818 (7)  | 3628 (3) | 46 |
| C (59) | 3951 (4) | 7300 (7)  | 4200 (3) | 64 |
| C (60) | 3561 (4) | 6681 (6)  | 4363 (3) | 45 |
| C (61) | 3235 (4) | 7374 (6)  | 4534 (3) | 41 |
| C (62) | 3303 (4) | 8239 (7)  | 4346 (3) | 59 |
| C (63) | 4560 (5) | 9876 (7)  | 4489 (3) | 69 |
| C (64) | 4558 (5) | 10725 (8) | 4669 (3) | 75 |
| C (65) | 4458 (4) | 11477 (8) | 4417 (3) | 55 |
| C (66) | 4544 (4) | 11015 (6) | 4096 (3) | 43 |
| C (67) | 5031 (4) | 10037 (7) | 3333 (3) | 44 |
| C (68) | 5127 (4) | 9438 (7)  | 3050 (3) | 51 |
| C (69) | 4635 (4) | 9581 (7)  | 2827 (3) | 52 |
| C (70) | 4261 (4) | 9956 (7)  | 3064 (3) | 44 |
| C (71) | 4213 (3) | 7384 (6)  | 3254 (2) | 32 |
| C (72) | 3917 (3) | 6488 (6)  | 3209 (2) | 35 |
| C (73) | 3393 (3) | 6852 (6)  | 3112 (2) | 36 |
| C (74) | 3353 (3) | 7735 (6)  | 3303 (2) | 37 |
| C (75) | 7802 (3) | 8120 (5)  | 1546 (2) | 18 |
| C (76) | 7973 (3) | 7493 (6)  | 1784 (2) | 28 |
| C (77) | 7617 (4) | 6950 (6)  | 1940 (2) | 40 |
| C (78) | 7113 (3) | 6999 (6)  | 1862 (3) | 41 |
| C (79) | 6949 (3) | 7599 (6)  | 1627 (2) | 37 |
| C (80) | 7284 (3) | 8186 (6)  | 1468 (2) | 30 |
| C (81) | 8538 (3) | 7389 (6)  | 1853 (2) | 35 |
| C (82) | 8696 (4) | 7220 (8)  | 2204 (3) | 61 |

# Supplementary Material (ESI) for Chemical Communications  
# This journal is © The Royal Society of Chemistry 2005

|         |           |            |          |     |
|---------|-----------|------------|----------|-----|
| C (83)  | 8737 (3)  | 6609 (7)   | 1626 (3) | 49  |
| C (84)  | 7075 (3)  | 8863 (6)   | 1218 (3) | 33  |
| C (85)  | 6669 (3)  | 9457 (6)   | 1373 (3) | 50  |
| C (86)  | 6854 (3)  | 8382 (6)   | 913 (2)  | 39  |
| C (87)  | 8711 (3)  | 8899 (6)   | 628 (2)  | 23  |
| C (88)  | 8547 (3)  | 9509 (6)   | 371 (2)  | 23  |
| C (89)  | 8691 (3)  | 9290 (6)   | 65 (2)   | 30  |
| C (90)  | 8977 (3)  | 8513 (6)   | -7 (2)   | 36  |
| C (91)  | 9136 (3)  | 7915 (6)   | 243 (2)  | 32  |
| C (92)  | 9010 (3)  | 8095 (6)   | 558 (2)  | 24  |
| C (93)  | 8199 (3)  | 10309 (6)  | 448 (2)  | 25  |
| C (94)  | 8197 (4)  | 11089 (6)  | 192 (2)  | 38  |
| C (95)  | 7658 (3)  | 9918 (6)   | 480 (2)  | 31  |
| C (96)  | 9188 (3)  | 7428 (5)   | 815 (2)  | 27  |
| C (97)  | 9750 (3)  | 7358 (6)   | 827 (3)  | 45  |
| C (98)  | 8975 (4)  | 6481 (6)   | 765 (3)  | 46  |
| C (99)  | 8265 (3)  | 8547 (5)   | 1094 (2) | 17  |
| C (100) | 9280 (3)  | 12058 (5)  | 1932 (2) | 19  |
| C (101) | 8934 (3)  | 12545 (5)  | 2119 (2) | 21  |
| C (102) | 9107 (3)  | 13026 (6)  | 2392 (2) | 30  |
| C (103) | 9605 (3)  | 13035 (6)  | 2482 (2) | 31  |
| C (104) | 9942 (3)  | 12571 (6)  | 2299 (2) | 24  |
| C (105) | 9785 (3)  | 12052 (5)  | 2029 (2) | 22  |
| C (106) | 8389 (3)  | 12616 (6)  | 2003 (2) | 25  |
| C (107) | 8019 (3)  | 12548 (6)  | 2275 (2) | 32  |
| C (108) | 8292 (4)  | 13469 (7)  | 1811 (2) | 45  |
| C (109) | 10190 (3) | 11542 (6)  | 1832 (2) | 22  |
| C (110) | 10526 (3) | 10931 (6)  | 2036 (2) | 36  |
| C (111) | 10496 (3) | 12264 (6)  | 1650 (2) | 31  |
| C (112) | 9256 (3)  | 11719 (6)  | 800 (2)  | 20  |
| C (113) | 9589 (3)  | 11223 (5)  | 606 (2)  | 18  |
| C (114) | 9690 (3)  | 11573 (6)  | 308 (2)  | 28  |
| C (115) | 9492 (3)  | 12377 (6)  | 199 (2)  | 33  |
| C (116) | 9180 (3)  | 12876 (6)  | 396 (2)  | 25  |
| C (117) | 9052 (3)  | 12559 (5)  | 695 (2)  | 18  |
| C (118) | 9859 (3)  | 10364 (5)  | 727 (2)  | 23  |
| C (119) | 10029 (3) | 9729 (6)   | 459 (2)  | 31  |
| C (120) | 10305 (3) | 10645 (6)  | 955 (2)  | 36  |
| C (121) | 8690 (3)  | 13132 (5)  | 894 (2)  | 19  |
| C (122) | 8210 (3)  | 13362 (6)  | 716 (2)  | 35  |
| C (123) | 8940 (3)  | 14017 (6)  | 1019 (2) | 38  |
| C (124) | 9257 (3)  | 11832 (5)  | 1370 (2) | 18  |
| C (125) | 8650 (4)  | 9977 (7)   | 2268 (2) | 43  |
| C (126) | 8274 (4)  | 9794 (7)   | 2520 (3) | 53  |
| C (127) | 7806 (4)  | 9468 (7)   | 2342 (2) | 48  |
| C (128) | 7833 (3)  | 10025 (6)  | 2043 (2) | 32  |
| C (129) | 8205 (5)  | 9337 (10)  | 3565 (4) | 128 |
| C (130) | 7616 (5)  | 9280 (9)   | 3564 (4) | 122 |
| C (131) | 7475 (5)  | 9511 (9)   | 3848 (4) | 84  |
| C (132) | 7868 (5)  | 10104 (11) | 3943 (3) | 92  |
| C (133) | 8401 (4)  | 12072 (8)  | 3276 (4) | 84  |
| C (134) | 8412 (3)  | 13051 (7)  | 3200 (3) | 42  |
| C (135) | 8950 (3)  | 13381 (6)  | 3276 (3) | 40  |
| C (136) | 9231 (4)  | 12459 (7)  | 3324 (3) | 62  |
| C (137) | 8666 (5)  | 11433 (9)  | 4504 (3) | 83  |
| C (138) | 8254 (5)  | 12202 (8)  | 4567 (3) | 80  |
| C (139) | 8524 (5)  | 13031 (10) | 4439 (3) | 85  |
| C (140) | 8782 (6)  | 12677 (9)  | 4158 (4) | 95  |
| C (141) | 9741 (4)  | 9977 (8)   | 4468 (3) | 56  |
| C (142) | 9488 (5)  | 9224 (9)   | 4671 (3) | 77  |



# Supplementary Material (ESI) for Chemical Communications  
# This journal is © The Royal Society of Chemistry 2005

|         |           |            |          |     |
|---------|-----------|------------|----------|-----|
| C (143) | 9286 (6)  | 8490 (9)   | 4408 (4) | 104 |
| C (144) | 9491 (5)  | 8812 (7)   | 4125 (3) | 71  |
| C (145) | 9353 (5)  | 9978 (9)   | 3037 (3) | 79  |
| C (146) | 9787 (6)  | 10164 (10) | 2851 (4) | 120 |
| C (147) | 10228 (6) | 10002 (17) | 3037 (4) | 197 |
| C (148) | 10082 (5) | 9961 (11)  | 3338 (5) | 147 |

---

Table 3. Bond lengths [Å] and angles [deg] for  
[Na(THF)<sub>5</sub>][Sm(I)<sub>2</sub>(DippForm)<sub>2</sub>(THF)].

---

|              |           |
|--------------|-----------|
| Sm(1)-N(2)   | 2.460(6)  |
| Sm(1)-O(1)   | 2.486(6)  |
| Sm(1)-N(4)   | 2.497(7)  |
| Sm(1)-N(1)   | 2.511(6)  |
| Sm(1)-N(3)   | 2.522(6)  |
| Sm(1)-C(25)  | 2.877(7)  |
| Sm(1)-C(50)  | 2.909(8)  |
| Sm(1)-I(2)   | 3.1031(7) |
| Sm(1)-I(1)   | 3.1143(7) |
| Sm(2)-N(6)   | 2.469(6)  |
| Sm(2)-N(8)   | 2.485(7)  |
| Sm(2)-O(7)   | 2.498(6)  |
| Sm(2)-N(7)   | 2.519(6)  |
| Sm(2)-N(5)   | 2.525(6)  |
| Sm(2)-C(124) | 2.874(8)  |
| Sm(2)-C(99)  | 2.878(8)  |
| Sm(2)-I(4)   | 3.0904(7) |
| Sm(2)-I(3)   | 3.1129(6) |
| Na(1)-O(3)   | 2.311(7)  |
| Na(1)-O(4)   | 2.331(7)  |
| Na(1)-O(2)   | 2.337(7)  |
| Na(1)-O(6)   | 2.340(7)  |
| Na(1)-O(5)   | 2.346(7)  |
| Na(2)-O(9)   | 2.283(8)  |
| Na(2)-O(10)  | 2.297(10) |
| Na(2)-O(8)   | 2.299(8)  |
| Na(2)-O(11)  | 2.322(8)  |
| Na(2)-O(12)  | 2.387(9)  |
| O(1)-C(54)   | 1.475(9)  |
| O(1)-C(51)   | 1.494(10) |
| O(2)-C(55)   | 1.424(12) |
| O(2)-C(58)   | 1.478(11) |
| O(3)-C(59)   | 1.390(11) |
| O(3)-C(62)   | 1.445(12) |
| O(4)-C(63)   | 1.427(12) |
| O(4)-C(66)   | 1.437(11) |
| O(5)-C(70)   | 1.445(11) |
| O(5)-C(67)   | 1.457(11) |
| O(6)-C(71)   | 1.414(10) |
| O(6)-C(74)   | 1.463(10) |
| O(7)-C(125)  | 1.438(10) |
| O(7)-C(128)  | 1.439(10) |
| O(8)-C(129)  | 1.278(15) |
| O(8)-C(132)  | 1.428(14) |
| O(9)-C(136)  | 1.416(12) |
| O(9)-C(133)  | 1.443(12) |
| O(10)-C(137) | 1.373(15) |
| O(10)-C(140) | 1.434(14) |
| O(11)-C(141) | 1.386(12) |
| O(11)-C(144) | 1.431(12) |
| O(12)-C(148) | 1.478(16) |
| O(12)-C(145) | 1.513(14) |
| N(1)-C(25)   | 1.280(10) |
| N(1)-C(1)    | 1.389(10) |
| N(2)-C(25)   | 1.331(10) |
| N(2)-C(13)   | 1.422(10) |

# Supplementary Material (ESI) for Chemical Communications  
# This journal is © The Royal Society of Chemistry 2005

|             |           |
|-------------|-----------|
| N(3)-C(50)  | 1.334(10) |
| N(3)-C(26)  | 1.414(10) |
| N(4)-C(50)  | 1.344(10) |
| N(4)-C(38)  | 1.417(10) |
| N(5)-C(99)  | 1.313(10) |
| N(5)-C(75)  | 1.414(10) |
| N(6)-C(99)  | 1.321(10) |
| N(6)-C(87)  | 1.425(10) |
| N(7)-C(124) | 1.334(10) |
| N(7)-C(100) | 1.407(10) |
| N(8)-C(124) | 1.337(10) |
| N(8)-C(112) | 1.431(10) |
| C(1)-C(2)   | 1.378(12) |
| C(1)-C(6)   | 1.428(11) |
| C(2)-C(3)   | 1.420(12) |
| C(2)-C(7)   | 1.503(11) |
| C(3)-C(4)   | 1.383(13) |
| C(4)-C(5)   | 1.470(14) |
| C(5)-C(6)   | 1.387(13) |
| C(6)-C(10)  | 1.484(12) |
| C(7)-C(9)   | 1.489(14) |
| C(7)-C(8)   | 1.558(14) |
| C(10)-C(11) | 1.513(12) |
| C(10)-C(12) | 1.544(13) |
| C(13)-C(18) | 1.405(12) |
| C(13)-C(14) | 1.440(12) |
| C(14)-C(15) | 1.385(13) |
| C(14)-C(19) | 1.486(12) |
| C(15)-C(16) | 1.432(13) |
| C(16)-C(17) | 1.382(13) |
| C(17)-C(18) | 1.422(13) |
| C(18)-C(22) | 1.525(12) |
| C(19)-C(20) | 1.506(12) |
| C(19)-C(21) | 1.550(12) |
| C(22)-C(23) | 1.541(11) |
| C(22)-C(24) | 1.551(11) |
| C(26)-C(31) | 1.392(11) |
| C(26)-C(27) | 1.420(11) |
| C(27)-C(28) | 1.380(11) |
| C(27)-C(32) | 1.537(11) |
| C(28)-C(29) | 1.379(11) |
| C(29)-C(30) | 1.355(12) |
| C(30)-C(31) | 1.368(11) |
| C(31)-C(35) | 1.548(12) |
| C(32)-C(33) | 1.519(12) |
| C(32)-C(34) | 1.556(13) |
| C(35)-C(37) | 1.490(12) |
| C(35)-C(36) | 1.515(11) |
| C(38)-C(39) | 1.416(11) |
| C(38)-C(43) | 1.428(11) |
| C(39)-C(40) | 1.388(12) |
| C(39)-C(44) | 1.534(11) |
| C(40)-C(41) | 1.393(12) |
| C(41)-C(42) | 1.396(12) |
| C(42)-C(43) | 1.367(12) |
| C(43)-C(47) | 1.540(11) |
| C(44)-C(46) | 1.523(11) |
| C(44)-C(45) | 1.531(11) |
| C(47)-C(49) | 1.506(11) |
| C(47)-C(48) | 1.525(11) |
| C(51)-C(52) | 1.551(14) |

# Supplementary Material (ESI) for Chemical Communications  
# This journal is © The Royal Society of Chemistry 2005

|                  |            |
|------------------|------------|
| C (52) -C (53)   | 1.555 (13) |
| C (53) -C (54)   | 1.510 (12) |
| C (55) -C (56)   | 1.570 (13) |
| C (56) -C (57)   | 1.551 (14) |
| C (57) -C (58)   | 1.504 (14) |
| C (59) -C (60)   | 1.543 (14) |
| C (60) -C (61)   | 1.517 (13) |
| C (61) -C (62)   | 1.482 (13) |
| C (63) -C (64)   | 1.431 (15) |
| C (64) -C (65)   | 1.524 (16) |
| C (65) -C (66)   | 1.511 (14) |
| C (67) -C (68)   | 1.486 (14) |
| C (68) -C (69)   | 1.601 (14) |
| C (69) -C (70)   | 1.524 (15) |
| C (71) -C (72)   | 1.522 (12) |
| C (72) -C (73)   | 1.539 (12) |
| C (73) -C (74)   | 1.501 (12) |
| C (75) -C (76)   | 1.404 (11) |
| C (75) -C (80)   | 1.417 (11) |
| C (76) -C (77)   | 1.406 (12) |
| C (76) -C (81)   | 1.535 (12) |
| C (77) -C (78)   | 1.382 (12) |
| C (78) -C (79)   | 1.363 (13) |
| C (79) -C (80)   | 1.410 (12) |
| C (80) -C (84)   | 1.520 (12) |
| C (81) -C (82)   | 1.528 (13) |
| C (81) -C (83)   | 1.568 (14) |
| C (84) -C (85)   | 1.538 (12) |
| C (84) -C (86)   | 1.544 (13) |
| C (87) -C (88)   | 1.440 (11) |
| C (87) -C (92)   | 1.441 (11) |
| C (88) -C (89)   | 1.377 (12) |
| C (88) -C (93)   | 1.521 (12) |
| C (89) -C (90)   | 1.392 (12) |
| C (90) -C (91)   | 1.405 (13) |
| C (91) -C (92)   | 1.388 (12) |
| C (92) -C (96)   | 1.502 (11) |
| C (93) -C (94)   | 1.545 (12) |
| C (93) -C (95)   | 1.562 (11) |
| C (96) -C (98)   | 1.486 (11) |
| C (96) -C (97)   | 1.508 (11) |
| C (100) -C (105) | 1.398 (11) |
| C (100) -C (101) | 1.414 (11) |
| C (101) -C (102) | 1.395 (11) |
| C (101) -C (106) | 1.525 (10) |
| C (102) -C (103) | 1.373 (11) |
| C (103) -C (104) | 1.373 (12) |
| C (104) -C (105) | 1.401 (11) |
| C (105) -C (109) | 1.563 (12) |
| C (106) -C (108) | 1.480 (12) |
| C (106) -C (107) | 1.530 (12) |
| C (109) -C (110) | 1.504 (11) |
| C (109) -C (111) | 1.534 (12) |
| C (112) -C (117) | 1.389 (11) |
| C (112) -C (113) | 1.413 (11) |
| C (113) -C (114) | 1.372 (12) |
| C (113) -C (118) | 1.508 (11) |
| C (114) -C (115) | 1.345 (12) |
| C (115) -C (116) | 1.387 (12) |
| C (116) -C (117) | 1.378 (11) |
| C (117) -C (121) | 1.532 (11) |

# Supplementary Material (ESI) for Chemical Communications  
# This journal is © The Royal Society of Chemistry 2005

|                  |            |
|------------------|------------|
| C (118) -C (119) | 1.519 (12) |
| C (118) -C (120) | 1.557 (11) |
| C (121) -C (122) | 1.502 (11) |
| C (121) -C (123) | 1.521 (11) |
| C (125) -C (126) | 1.500 (14) |
| C (126) -C (127) | 1.509 (14) |
| C (127) -C (128) | 1.482 (12) |
| C (129) -C (130) | 1.577 (17) |
| C (130) -C (131) | 1.30 (2)   |
| C (131) -C (132) | 1.402 (15) |
| C (133) -C (134) | 1.442 (14) |
| C (134) -C (135) | 1.539 (12) |
| C (135) -C (136) | 1.534 (13) |
| C (137) -C (138) | 1.588 (16) |
| C (138) -C (139) | 1.500 (17) |
| C (139) -C (140) | 1.465 (17) |
| C (141) -C (142) | 1.542 (15) |
| C (142) -C (143) | 1.603 (18) |
| C (143) -C (144) | 1.394 (17) |
| C (145) -C (146) | 1.441 (18) |
| C (146) -C (147) | 1.41 (2)   |
| C (147) -C (148) | 1.33 (2)   |

|                        |            |
|------------------------|------------|
| N (2) -Sm (1) -O (1)   | 131.3 (2)  |
| N (2) -Sm (1) -N (4)   | 94.5 (2)   |
| O (1) -Sm (1) -N (4)   | 133.9 (2)  |
| N (2) -Sm (1) -N (1)   | 53.9 (2)   |
| O (1) -Sm (1) -N (1)   | 77.5 (2)   |
| N (4) -Sm (1) -N (1)   | 147.4 (2)  |
| N (2) -Sm (1) -N (3)   | 147.5 (2)  |
| O (1) -Sm (1) -N (3)   | 80.6 (2)   |
| N (4) -Sm (1) -N (3)   | 54.7 (2)   |
| N (1) -Sm (1) -N (3)   | 157.9 (2)  |
| N (2) -Sm (1) -C (25)  | 27.5 (2)   |
| O (1) -Sm (1) -C (25)  | 103.9 (2)  |
| N (4) -Sm (1) -C (25)  | 121.5 (2)  |
| N (1) -Sm (1) -C (25)  | 26.4 (2)   |
| N (3) -Sm (1) -C (25)  | 173.8 (2)  |
| N (2) -Sm (1) -C (50)  | 121.4 (2)  |
| O (1) -Sm (1) -C (50)  | 107.3 (2)  |
| N (4) -Sm (1) -C (50)  | 27.4 (2)   |
| N (1) -Sm (1) -C (50)  | 174.7 (2)  |
| N (3) -Sm (1) -C (50)  | 27.3 (2)   |
| C (25) -Sm (1) -C (50) | 148.8 (2)  |
| N (2) -Sm (1) -I (2)   | 87.34 (15) |
| O (1) -Sm (1) -I (2)   | 90.43 (13) |
| N (4) -Sm (1) -I (2)   | 97.07 (15) |
| N (1) -Sm (1) -I (2)   | 89.90 (15) |
| N (3) -Sm (1) -I (2)   | 86.77 (14) |
| C (25) -Sm (1) -I (2)  | 89.01 (15) |
| C (50) -Sm (1) -I (2)  | 92.08 (15) |
| N (2) -Sm (1) -I (1)   | 96.94 (15) |
| O (1) -Sm (1) -I (1)   | 84.49 (13) |
| N (4) -Sm (1) -I (1)   | 85.62 (15) |
| N (1) -Sm (1) -I (1)   | 90.20 (14) |
| N (3) -Sm (1) -I (1)   | 91.18 (14) |
| C (25) -Sm (1) -I (1)  | 93.40 (15) |
| C (50) -Sm (1) -I (1)  | 88.27 (15) |
| I (2) -Sm (1) -I (1)   | 174.78 (2) |
| N (6) -Sm (2) -N (8)   | 92.8 (2)   |
| N (6) -Sm (2) -O (7)   | 131.8 (2)  |

# Supplementary Material (ESI) for Chemical Communications  
# This journal is © The Royal Society of Chemistry 2005

|                         |            |
|-------------------------|------------|
| N (8) -Sm (2) -O (7)    | 135.3 (2)  |
| N (6) -Sm (2) -N (7)    | 147.3 (2)  |
| N (8) -Sm (2) -N (7)    | 55.3 (2)   |
| O (7) -Sm (2) -N (7)    | 80.7 (2)   |
| N (6) -Sm (2) -N (5)    | 54.4 (2)   |
| N (8) -Sm (2) -N (5)    | 146.5 (2)  |
| O (7) -Sm (2) -N (5)    | 77.5 (2)   |
| N (7) -Sm (2) -N (5)    | 158.1 (2)  |
| N (6) -Sm (2) -C (124)  | 120.2 (2)  |
| N (8) -Sm (2) -C (124)  | 27.7 (2)   |
| O (7) -Sm (2) -C (124)  | 108.0 (2)  |
| N (7) -Sm (2) -C (124)  | 27.7 (2)   |
| N (5) -Sm (2) -C (124)  | 174.1 (2)  |
| N (6) -Sm (2) -C (99)   | 27.2 (2)   |
| N (8) -Sm (2) -C (99)   | 119.8 (2)  |
| O (7) -Sm (2) -C (99)   | 104.6 (2)  |
| N (7) -Sm (2) -C (99)   | 174.1 (2)  |
| N (5) -Sm (2) -C (99)   | 27.1 (2)   |
| C (124) -Sm (2) -C (99) | 147.4 (2)  |
| N (6) -Sm (2) -I (4)    | 89.95 (14) |
| N (8) -Sm (2) -I (4)    | 95.11 (14) |
| O (7) -Sm (2) -I (4)    | 89.16 (13) |
| N (7) -Sm (2) -I (4)    | 86.20 (14) |
| N (5) -Sm (2) -I (4)    | 91.56 (14) |
| C (124) -Sm (2) -I (4)  | 90.78 (14) |
| C (99) -Sm (2) -I (4)   | 91.22 (14) |
| N (6) -Sm (2) -I (3)    | 96.08 (14) |
| N (8) -Sm (2) -I (3)    | 86.45 (14) |
| O (7) -Sm (2) -I (3)    | 85.45 (13) |
| N (7) -Sm (2) -I (3)    | 89.69 (14) |
| N (5) -Sm (2) -I (3)    | 90.47 (14) |
| C (124) -Sm (2) -I (3)  | 87.78 (14) |
| C (99) -Sm (2) -I (3)   | 93.31 (14) |
| I (4) -Sm (2) -I (3)    | 173.69 (2) |
| O (3) -Na (1) -O (4)    | 89.8 (3)   |
| O (3) -Na (1) -O (2)    | 89.8 (3)   |
| O (4) -Na (1) -O (2)    | 96.7 (3)   |
| O (3) -Na (1) -O (6)    | 90.2 (3)   |
| O (4) -Na (1) -O (6)    | 158.7 (3)  |
| O (2) -Na (1) -O (6)    | 104.5 (3)  |
| O (3) -Na (1) -O (5)    | 164.2 (3)  |
| O (4) -Na (1) -O (5)    | 87.2 (3)   |
| O (2) -Na (1) -O (5)    | 106.0 (3)  |
| O (6) -Na (1) -O (5)    | 87.0 (3)   |
| O (9) -Na (2) -O (10)   | 90.8 (3)   |
| O (9) -Na (2) -O (8)    | 96.2 (3)   |
| O (10) -Na (2) -O (8)   | 96.7 (3)   |
| O (9) -Na (2) -O (11)   | 160.3 (3)  |
| O (10) -Na (2) -O (11)  | 91.5 (3)   |
| O (8) -Na (2) -O (11)   | 102.9 (3)  |
| O (9) -Na (2) -O (12)   | 82.6 (3)   |
| O (10) -Na (2) -O (12)  | 158.0 (4)  |
| O (8) -Na (2) -O (12)   | 104.8 (3)  |
| O (11) -Na (2) -O (12)  | 88.0 (3)   |
| C (54) -O (1) -C (51)   | 108.8 (6)  |
| C (54) -O (1) -Sm (1)   | 123.7 (5)  |
| C (51) -O (1) -Sm (1)   | 127.5 (5)  |
| C (55) -O (2) -C (58)   | 109.9 (7)  |
| C (55) -O (2) -Na (1)   | 117.4 (5)  |
| C (58) -O (2) -Na (1)   | 130.7 (6)  |

# Supplementary Material (ESI) for Chemical Communications  
# This journal is © The Royal Society of Chemistry 2005

|                          |            |
|--------------------------|------------|
| C (59) -O (3) -C (62)    | 108.1 (7)  |
| C (59) -O (3) -Na (1)    | 121.5 (6)  |
| C (62) -O (3) -Na (1)    | 129.1 (6)  |
| C (63) -O (4) -C (66)    | 107.6 (7)  |
| C (63) -O (4) -Na (1)    | 131.8 (6)  |
| C (66) -O (4) -Na (1)    | 118.7 (6)  |
| C (70) -O (5) -C (67)    | 105.9 (7)  |
| C (70) -O (5) -Na (1)    | 113.2 (5)  |
| C (67) -O (5) -Na (1)    | 133.9 (6)  |
| C (71) -O (6) -C (74)    | 111.1 (6)  |
| C (71) -O (6) -Na (1)    | 127.4 (5)  |
| C (74) -O (6) -Na (1)    | 119.2 (5)  |
| C (125) -O (7) -C (128)  | 109.6 (7)  |
| C (125) -O (7) -Sm (2)   | 126.9 (6)  |
| C (128) -O (7) -Sm (2)   | 123.5 (5)  |
| C (129) -O (8) -C (132)  | 104.4 (10) |
| C (129) -O (8) -Na (2)   | 124.4 (9)  |
| C (132) -O (8) -Na (2)   | 130.5 (7)  |
| C (136) -O (9) -C (133)  | 106.6 (9)  |
| C (136) -O (9) -Na (2)   | 121.3 (6)  |
| C (133) -O (9) -Na (2)   | 132.1 (7)  |
| C (137) -O (10) -C (140) | 111.6 (10) |
| C (137) -O (10) -Na (2)  | 124.5 (8)  |
| C (140) -O (10) -Na (2)  | 120.5 (8)  |
| C (141) -O (11) -C (144) | 108.6 (8)  |
| C (141) -O (11) -Na (2)  | 130.5 (6)  |
| C (144) -O (11) -Na (2)  | 116.2 (7)  |
| C (148) -O (12) -C (145) | 99.7 (11)  |
| C (148) -O (12) -Na (2)  | 132.9 (10) |
| C (145) -O (12) -Na (2)  | 125.8 (7)  |
| C (25) -N (1) -C (1)     | 120.9 (7)  |
| C (25) -N (1) -Sm (1)    | 93.0 (5)   |
| C (1) -N (1) -Sm (1)     | 145.5 (6)  |
| C (25) -N (2) -C (13)    | 117.2 (6)  |
| C (25) -N (2) -Sm (1)    | 93.9 (5)   |
| C (13) -N (2) -Sm (1)    | 148.7 (5)  |
| C (50) -N (3) -C (26)    | 119.6 (7)  |
| C (50) -N (3) -Sm (1)    | 92.7 (5)   |
| C (26) -N (3) -Sm (1)    | 146.9 (5)  |
| C (50) -N (4) -C (38)    | 118.2 (7)  |
| C (50) -N (4) -Sm (1)    | 93.6 (5)   |
| C (38) -N (4) -Sm (1)    | 147.8 (5)  |
| C (99) -N (5) -C (75)    | 120.3 (7)  |
| C (99) -N (5) -Sm (2)    | 91.6 (5)   |
| C (75) -N (5) -Sm (2)    | 147.8 (5)  |
| C (99) -N (6) -C (87)    | 118.6 (7)  |
| C (99) -N (6) -Sm (2)    | 93.9 (5)   |
| C (87) -N (6) -Sm (2)    | 147.4 (5)  |
| C (124) -N (7) -C (100)  | 118.5 (7)  |
| C (124) -N (7) -Sm (2)   | 91.2 (5)   |
| C (100) -N (7) -Sm (2)   | 149.7 (5)  |
| C (124) -N (8) -C (112)  | 118.2 (7)  |
| C (124) -N (8) -Sm (2)   | 92.6 (5)   |
| C (112) -N (8) -Sm (2)   | 148.1 (5)  |
| C (2) -C (1) -N (1)      | 119.5 (7)  |
| C (2) -C (1) -C (6)      | 121.0 (8)  |
| N (1) -C (1) -C (6)      | 119.3 (8)  |
| C (1) -C (2) -C (3)      | 122.0 (8)  |
| C (1) -C (2) -C (7)      | 120.9 (8)  |
| C (3) -C (2) -C (7)      | 116.8 (8)  |

# Supplementary Material (ESI) for Chemical Communications  
# This journal is © The Royal Society of Chemistry 2005

|                        |            |
|------------------------|------------|
| C (4) -C (3) -C (2)    | 118.5 (10) |
| C (3) -C (4) -C (5)    | 119.7 (9)  |
| C (6) -C (5) -C (4)    | 120.8 (9)  |
| C (5) -C (6) -C (1)    | 118.0 (9)  |
| C (5) -C (6) -C (10)   | 116.9 (8)  |
| C (1) -C (6) -C (10)   | 125.1 (8)  |
| C (9) -C (7) -C (2)    | 110.9 (9)  |
| C (9) -C (7) -C (8)    | 112.0 (8)  |
| C (2) -C (7) -C (8)    | 114.4 (8)  |
| C (6) -C (10) -C (11)  | 115.2 (8)  |
| C (6) -C (10) -C (12)  | 111.4 (7)  |
| C (11) -C (10) -C (12) | 107.5 (8)  |
| C (18) -C (13) -N (2)  | 120.3 (8)  |
| C (18) -C (13) -C (14) | 121.1 (8)  |
| N (2) -C (13) -C (14)  | 118.6 (7)  |
| C (15) -C (14) -C (13) | 120.1 (9)  |
| C (15) -C (14) -C (19) | 118.8 (9)  |
| C (13) -C (14) -C (19) | 120.9 (8)  |
| C (14) -C (15) -C (16) | 119.2 (10) |
| C (17) -C (16) -C (15) | 119.9 (10) |
| C (16) -C (17) -C (18) | 122.6 (9)  |
| C (13) -C (18) -C (17) | 117.0 (9)  |
| C (13) -C (18) -C (22) | 123.1 (8)  |
| C (17) -C (18) -C (22) | 119.9 (8)  |
| C (14) -C (19) -C (20) | 114.7 (8)  |
| C (14) -C (19) -C (21) | 110.6 (7)  |
| C (20) -C (19) -C (21) | 111.5 (7)  |
| C (18) -C (22) -C (23) | 111.6 (8)  |
| C (18) -C (22) -C (24) | 111.8 (8)  |
| C (23) -C (22) -C (24) | 109.9 (7)  |
| N (1) -C (25) -N (2)   | 119.2 (7)  |
| N (1) -C (25) -Sm (1)  | 60.6 (4)   |
| N (2) -C (25) -Sm (1)  | 58.6 (4)   |
| C (31) -C (26) -N (3)  | 121.8 (7)  |
| C (31) -C (26) -C (27) | 119.5 (8)  |
| N (3) -C (26) -C (27)  | 118.6 (7)  |
| C (28) -C (27) -C (26) | 119.6 (8)  |
| C (28) -C (27) -C (32) | 120.0 (8)  |
| C (26) -C (27) -C (32) | 120.3 (8)  |
| C (29) -C (28) -C (27) | 119.5 (8)  |
| C (30) -C (29) -C (28) | 120.4 (8)  |
| C (29) -C (30) -C (31) | 122.4 (8)  |
| C (30) -C (31) -C (26) | 118.5 (8)  |
| C (30) -C (31) -C (35) | 119.5 (7)  |
| C (26) -C (31) -C (35) | 121.9 (8)  |
| C (33) -C (32) -C (27) | 116.0 (8)  |
| C (33) -C (32) -C (34) | 110.5 (7)  |
| C (27) -C (32) -C (34) | 108.4 (7)  |
| C (37) -C (35) -C (36) | 108.3 (8)  |
| C (37) -C (35) -C (31) | 110.6 (7)  |
| C (36) -C (35) -C (31) | 111.9 (8)  |
| C (39) -C (38) -N (4)  | 118.3 (7)  |
| C (39) -C (38) -C (43) | 119.3 (8)  |
| N (4) -C (38) -C (43)  | 122.3 (8)  |
| C (40) -C (39) -C (38) | 118.4 (8)  |
| C (40) -C (39) -C (44) | 120.9 (8)  |
| C (38) -C (39) -C (44) | 120.6 (8)  |
| C (39) -C (40) -C (41) | 122.9 (8)  |
| C (40) -C (41) -C (42) | 117.5 (9)  |
| C (43) -C (42) -C (41) | 122.5 (8)  |
| C (42) -C (43) -C (38) | 119.3 (8)  |



# Supplementary Material (ESI) for Chemical Communications  
# This journal is © The Royal Society of Chemistry 2005

|                        |            |
|------------------------|------------|
| C (42) -C (43) -C (47) | 118.3 (8)  |
| C (38) -C (43) -C (47) | 122.4 (8)  |
| C (46) -C (44) -C (45) | 111.7 (7)  |
| C (46) -C (44) -C (39) | 109.6 (7)  |
| C (45) -C (44) -C (39) | 112.6 (7)  |
| C (49) -C (47) -C (48) | 109.3 (7)  |
| C (49) -C (47) -C (43) | 110.3 (7)  |
| C (48) -C (47) -C (43) | 113.5 (8)  |
| N (3) -C (50) -N (4)   | 119.0 (7)  |
| N (3) -C (50) -Sm (1)  | 60.0 (4)   |
| N (4) -C (50) -Sm (1)  | 59.0 (4)   |
| O (1) -C (51) -C (52)  | 107.9 (7)  |
| C (51) -C (52) -C (53) | 100.4 (8)  |
| C (54) -C (53) -C (52) | 106.0 (8)  |
| O (1) -C (54) -C (53)  | 103.2 (7)  |
| O (2) -C (55) -C (56)  | 105.8 (7)  |
| C (57) -C (56) -C (55) | 101.1 (9)  |
| C (58) -C (57) -C (56) | 103.3 (8)  |
| O (2) -C (58) -C (57)  | 107.1 (8)  |
| O (3) -C (59) -C (60)  | 108.2 (8)  |
| C (61) -C (60) -C (59) | 103.6 (8)  |
| C (62) -C (61) -C (60) | 102.8 (8)  |
| O (3) -C (62) -C (61)  | 110.8 (8)  |
| O (4) -C (63) -C (64)  | 111.1 (10) |
| C (63) -C (64) -C (65) | 104.3 (10) |
| C (66) -C (65) -C (64) | 105.5 (9)  |
| O (4) -C (66) -C (65)  | 104.1 (9)  |
| O (5) -C (67) -C (68)  | 104.8 (8)  |
| C (67) -C (68) -C (69) | 102.8 (8)  |
| C (70) -C (69) -C (68) | 102.6 (9)  |
| O (5) -C (70) -C (69)  | 108.1 (8)  |
| O (6) -C (71) -C (72)  | 104.8 (7)  |
| C (71) -C (72) -C (73) | 102.2 (7)  |
| C (74) -C (73) -C (72) | 103.2 (7)  |
| O (6) -C (74) -C (73)  | 105.7 (7)  |
| C (76) -C (75) -N (5)  | 119.1 (7)  |
| C (76) -C (75) -C (80) | 120.0 (8)  |
| N (5) -C (75) -C (80)  | 120.9 (7)  |
| C (75) -C (76) -C (77) | 118.0 (8)  |
| C (75) -C (76) -C (81) | 119.5 (8)  |
| C (77) -C (76) -C (81) | 122.4 (9)  |
| C (78) -C (77) -C (76) | 122.3 (9)  |
| C (79) -C (78) -C (77) | 119.4 (9)  |
| C (78) -C (79) -C (80) | 121.3 (9)  |
| C (79) -C (80) -C (75) | 119.0 (9)  |
| C (79) -C (80) -C (84) | 118.6 (8)  |
| C (75) -C (80) -C (84) | 122.4 (8)  |
| C (82) -C (81) -C (76) | 115.9 (9)  |
| C (82) -C (81) -C (83) | 111.8 (8)  |
| C (76) -C (81) -C (83) | 107.9 (7)  |
| C (80) -C (84) -C (85) | 108.5 (9)  |
| C (80) -C (84) -C (86) | 113.5 (7)  |
| C (85) -C (84) -C (86) | 109.6 (7)  |
| N (6) -C (87) -C (88)  | 118.3 (7)  |
| N (6) -C (87) -C (92)  | 122.0 (8)  |
| C (88) -C (87) -C (92) | 119.8 (8)  |
| C (89) -C (88) -C (87) | 117.4 (8)  |
| C (89) -C (88) -C (93) | 124.0 (8)  |
| C (87) -C (88) -C (93) | 118.5 (8)  |
| C (88) -C (89) -C (90) | 123.6 (9)  |
| C (89) -C (90) -C (91) | 119.2 (9)  |

# Supplementary Material (ESI) for Chemical Communications  
# This journal is © The Royal Society of Chemistry 2005

|                           |            |
|---------------------------|------------|
| C (92) -C (91) -C (90)    | 120.5 (9)  |
| C (91) -C (92) -C (87)    | 119.5 (8)  |
| C (91) -C (92) -C (96)    | 118.2 (8)  |
| C (87) -C (92) -C (96)    | 122.3 (8)  |
| C (88) -C (93) -C (94)    | 113.0 (8)  |
| C (88) -C (93) -C (95)    | 108.8 (7)  |
| C (94) -C (93) -C (95)    | 109.6 (7)  |
| C (98) -C (96) -C (92)    | 111.9 (8)  |
| C (98) -C (96) -C (97)    | 108.8 (7)  |
| C (92) -C (96) -C (97)    | 111.1 (7)  |
| N (5) -C (99) -N (6)      | 120.1 (7)  |
| N (5) -C (99) -Sm (2)     | 61.3 (4)   |
| N (6) -C (99) -Sm (2)     | 58.8 (4)   |
| C (105) -C (100) -N (7)   | 121.7 (7)  |
| C (105) -C (100) -C (101) | 119.2 (8)  |
| N (7) -C (100) -C (101)   | 119.1 (7)  |
| C (102) -C (101) -C (100) | 119.1 (8)  |
| C (102) -C (101) -C (106) | 120.9 (8)  |
| C (100) -C (101) -C (106) | 119.7 (8)  |
| C (103) -C (102) -C (101) | 121.5 (9)  |
| C (104) -C (103) -C (102) | 119.6 (9)  |
| C (103) -C (104) -C (105) | 121.1 (8)  |
| C (100) -C (105) -C (104) | 119.5 (8)  |
| C (100) -C (105) -C (109) | 122.0 (8)  |
| C (104) -C (105) -C (109) | 118.3 (7)  |
| C (108) -C (106) -C (101) | 112.0 (7)  |
| C (108) -C (106) -C (107) | 110.2 (7)  |
| C (101) -C (106) -C (107) | 113.4 (8)  |
| C (110) -C (109) -C (111) | 110.8 (7)  |
| C (110) -C (109) -C (105) | 112.9 (8)  |
| C (111) -C (109) -C (105) | 109.4 (7)  |
| C (117) -C (112) -C (113) | 120.5 (8)  |
| C (117) -C (112) -N (8)   | 121.6 (8)  |
| C (113) -C (112) -N (8)   | 117.9 (7)  |
| C (114) -C (113) -C (112) | 118.5 (8)  |
| C (114) -C (113) -C (118) | 119.6 (8)  |
| C (112) -C (113) -C (118) | 121.7 (8)  |
| C (115) -C (114) -C (113) | 122.1 (9)  |
| C (114) -C (115) -C (116) | 118.9 (9)  |
| C (117) -C (116) -C (115) | 122.3 (8)  |
| C (116) -C (117) -C (112) | 117.6 (8)  |
| C (116) -C (117) -C (121) | 119.3 (7)  |
| C (112) -C (117) -C (121) | 123.1 (8)  |
| C (113) -C (118) -C (119) | 113.6 (8)  |
| C (113) -C (118) -C (120) | 110.0 (7)  |
| C (119) -C (118) -C (120) | 111.1 (7)  |
| C (122) -C (121) -C (123) | 110.2 (7)  |
| C (122) -C (121) -C (117) | 113.3 (7)  |
| C (123) -C (121) -C (117) | 110.8 (7)  |
| N (7) -C (124) -N (8)     | 120.9 (7)  |
| N (7) -C (124) -Sm (2)    | 61.2 (4)   |
| N (8) -C (124) -Sm (2)    | 59.7 (4)   |
| O (7) -C (125) -C (126)   | 104.4 (8)  |
| C (125) -C (126) -C (127) | 106.0 (9)  |
| C (128) -C (127) -C (126) | 100.5 (8)  |
| O (7) -C (128) -C (127)   | 105.3 (8)  |
| O (8) -C (129) -C (130)   | 105.1 (11) |
| C (131) -C (130) -C (129) | 107.6 (12) |
| C (130) -C (131) -C (132) | 100.1 (13) |
| C (131) -C (132) -O (8)   | 114.2 (12) |
| C (134) -C (133) -O (9)   | 108.2 (9)  |

# Supplementary Material (ESI) for Chemical Communications  
# This journal is © The Royal Society of Chemistry 2005

|                      |           |
|----------------------|-----------|
| C(133)-C(134)-C(135) | 106.2(8)  |
| C(136)-C(135)-C(134) | 102.3(8)  |
| O(9)-C(136)-C(135)   | 104.8(8)  |
| O(10)-C(137)-C(138)  | 103.8(10) |
| C(139)-C(138)-C(137) | 98.6(10)  |
| C(140)-C(139)-C(138) | 104.6(12) |
| O(10)-C(140)-C(139)  | 105.8(12) |
| O(11)-C(141)-C(142)  | 102.6(10) |
| C(141)-C(142)-C(143) | 103.4(11) |
| C(144)-C(143)-C(142) | 103.1(10) |
| C(143)-C(144)-O(11)  | 106.5(11) |
| C(146)-C(145)-O(12)  | 103.7(12) |
| C(147)-C(146)-C(145) | 110.4(15) |
| C(148)-C(147)-C(146) | 105.1(14) |
| C(147)-C(148)-O(12)  | 115.2(14) |

---

Symmetry transformations used to generate equivalent atoms:

Table 4. Anisotropic displacement parameters ( $\text{Å}^2 \times 10^3$ ) for  
 $[\text{Na}(\text{THF})_5][\text{Sm}(\text{I})_2(\text{DippForm})_2(\text{THF})]$ .

The anisotropic displacement factor exponent takes the form:  
 $-2 \pi^2 [ h^2 a^2 U_{11} + \dots + 2 h k a^* b^* U_{12} ]$

|       | U11 | U22 | U33 | U23 | U13 | U12 |
|-------|-----|-----|-----|-----|-----|-----|
| Sm(1) | 16  | 18  | 16  | 1   | 2   | 1   |
| Sm(2) | 15  | 17  | 16  | 0   | 1   | 0   |
| I(1)  | 20  | 29  | 29  | -3  | 0   | 1   |
| I(2)  | 20  | 25  | 37  | -1  | -4  | -1  |
| I(3)  | 18  | 25  | 26  | -1  | 1   | 2   |
| I(4)  | 22  | 26  | 45  | 4   | -8  | 3   |
| Na(1) | 26  | 28  | 28  | -3  | 5   | -7  |
| Na(2) | 41  | 42  | 50  | 11  | 6   | -1  |
| O(1)  | 26  | 42  | 18  | -1  | 5   | -2  |
| O(2)  | 34  | 30  | 49  | -10 | 0   | -2  |
| O(3)  | 43  | 39  | 48  | 17  | 7   | -2  |
| O(4)  | 44  | 34  | 33  | -6  | -3  | -4  |
| O(5)  | 34  | 52  | 24  | 1   | 6   | -5  |
| O(6)  | 33  | 30  | 47  | -14 | 13  | -6  |
| O(7)  | 33  | 36  | 14  | 5   | 5   | -1  |
| O(8)  | 46  | 49  | 68  | -33 | 15  | -23 |
| O(9)  | 35  | 47  | 99  | 29  | -5  | -10 |
| O(10) | 78  | 71  | 87  | -6  | 26  | 22  |
| O(11) | 95  | 30  | 40  | 10  | -8  | -5  |
| O(12) | 48  | 121 | 46  | 31  | 7   | 17  |
| N(1)  | 20  | 17  | 16  | -1  | 6   | 2   |
| N(2)  | 22  | 18  | 12  | 9   | 5   | -2  |
| N(3)  | 18  | 18  | 16  | 3   | 8   | -1  |
| N(4)  | 20  | 25  | 21  | 0   | 3   | 0   |
| N(5)  | 17  | 15  | 22  | -1  | 5   | 2   |
| N(6)  | 19  | 20  | 11  | 0   | 0   | -2  |
| N(7)  | 15  | 18  | 19  | -4  | -1  | -1  |
| N(8)  | 11  | 18  | 23  | 0   | 4   | 3   |
| C(1)  | 21  | 16  | 35  | -5  | 4   | 2   |
| C(2)  | 28  | 23  | 24  | -3  | 13  | -1  |
| C(3)  | 37  | 44  | 39  | -7  | 5   | 7   |
| C(4)  | 46  | 42  | 68  | 8   | 33  | 15  |
| C(5)  | 24  | 23  | 100 | 2   | 6   | 0   |
| C(6)  | 18  | 24  | 32  | 1   | 5   | 4   |
| C(7)  | 25  | 54  | 42  | -29 | 6   | 2   |
| C(8)  | 55  | 53  | 64  | -26 | -15 | 3   |
| C(9)  | 37  | 84  | 73  | 11  | 6   | -22 |
| C(10) | 29  | 21  | 37  | -3  | 8   | -1  |
| C(11) | 20  | 50  | 94  | -22 | 3   | -8  |
| C(12) | 42  | 42  | 46  | -2  | -5  | 8   |
| C(13) | 22  | 16  | 24  | 8   | 4   | 10  |
| C(14) | 25  | 34  | 23  | 8   | 4   | 10  |
| C(15) | 36  | 44  | 28  | 5   | 1   | 12  |
| C(16) | 34  | 61  | 43  | 34  | 15  | 18  |
| C(17) | 32  | 31  | 45  | 18  | 7   | 4   |
| C(18) | 23  | 33  | 33  | 13  | 12  | 15  |
| C(19) | 40  | 36  | 17  | 10  | -4  | 5   |
| C(20) | 58  | 31  | 23  | -10 | -4  | 11  |

# Supplementary Material (ESI) for Chemical Communications  
 # This journal is © The Royal Society of Chemistry 2005

|        |     |    |    |     |     |     |
|--------|-----|----|----|-----|-----|-----|
| C (21) | 38  | 45 | 32 | -2  | -11 | 5   |
| C (22) | 29  | 15 | 46 | -2  | 3   | -3  |
| C (23) | 28  | 38 | 63 | -4  | 13  | 0   |
| C (24) | 43  | 19 | 85 | 4   | 7   | 3   |
| C (25) | 20  | 15 | 17 | 11  | 5   | 3   |
| C (26) | 23  | 17 | 20 | 5   | 5   | 6   |
| C (27) | 21  | 19 | 22 | 6   | 9   | 7   |
| C (28) | 30  | 30 | 30 | 12  | 12  | 4   |
| C (29) | 38  | 39 | 5  | 8   | 0   | 17  |
| C (30) | 17  | 20 | 35 | 4   | 3   | 3   |
| C (31) | 17  | 18 | 25 | 4   | -3  | 6   |
| C (32) | 30  | 23 | 32 | 9   | -4  | -6  |
| C (33) | 29  | 55 | 43 | 26  | 11  | -2  |
| C (34) | 50  | 42 | 63 | 10  | -16 | -22 |
| C (35) | 26  | 19 | 28 | 6   | -5  | 2   |
| C (36) | 31  | 33 | 57 | 5   | -14 | -6  |
| C (37) | 33  | 33 | 38 | 17  | 17  | 10  |
| C (38) | 18  | 22 | 8  | 2   | 2   | 9   |
| C (39) | 23  | 28 | 15 | 5   | 6   | 11  |
| C (40) | 29  | 25 | 30 | 9   | 12  | 6   |
| C (41) | 33  | 35 | 17 | -7  | 8   | 7   |
| C (42) | 36  | 25 | 21 | -8  | 1   | 7   |
| C (43) | 20  | 26 | 23 | 4   | 3   | 6   |
| C (44) | 22  | 27 | 20 | -2  | 11  | -5  |
| C (45) | 36  | 29 | 28 | 0   | 5   | -3  |
| C (46) | 29  | 45 | 34 | 12  | 4   | 3   |
| C (47) | 35  | 20 | 16 | 2   | 5   | 1   |
| C (48) | 26  | 40 | 43 | -14 | 1   | 3   |
| C (49) | 41  | 20 | 54 | 12  | 10  | 2   |
| C (50) | 15  | 21 | 26 | 5   | 4   | 0   |
| C (51) | 40  | 39 | 34 | -4  | -10 | 4   |
| C (52) | 50  | 65 | 31 | 1   | 6   | -17 |
| C (53) | 40  | 47 | 30 | -8  | 17  | -6  |
| C (54) | 27  | 40 | 20 | -1  | 9   | -1  |
| C (55) | 41  | 24 | 94 | 5   | -6  | -3  |
| C (56) | 48  | 16 | 89 | -2  | 18  | -1  |
| C (57) | 32  | 37 | 56 | 18  | -1  | 2   |
| C (58) | 48  | 41 | 50 | -3  | -2  | -1  |
| C (59) | 67  | 60 | 66 | 24  | 29  | 31  |
| C (60) | 41  | 31 | 64 | 5   | 4   | -2  |
| C (61) | 38  | 35 | 51 | 12  | 13  | 2   |
| C (62) | 64  | 46 | 72 | 19  | 38  | 17  |
| C (63) | 101 | 49 | 54 | -14 | -38 | 9   |
| C (64) | 131 | 64 | 29 | -15 | -9  | -1  |
| C (65) | 51  | 63 | 51 | -32 | -2  | -16 |
| C (66) | 28  | 42 | 58 | -4  | 0   | -20 |
| C (67) | 32  | 53 | 48 | 13  | 1   | -9  |
| C (68) | 49  | 40 | 65 | 9   | 32  | 0   |
| C (69) | 74  | 47 | 34 | 4   | 8   | -5  |
| C (70) | 45  | 38 | 47 | 6   | -3  | -11 |
| C (71) | 32  | 32 | 33 | -8  | 12  | -7  |
| C (72) | 47  | 35 | 23 | -6  | 14  | -9  |
| C (73) | 31  | 42 | 36 | -6  | 8   | 0   |
| C (74) | 40  | 40 | 33 | -14 | 9   | 0   |
| C (75) | 30  | 7  | 18 | -2  | -1  | -2  |
| C (76) | 34  | 26 | 26 | -1  | 8   | -5  |
| C (77) | 63  | 33 | 25 | 16  | 15  | -8  |
| C (78) | 32  | 41 | 53 | 7   | 29  | -4  |
| C (79) | 30  | 36 | 46 | 14  | 17  | 0   |

# Supplementary Material (ESI) for Chemical Communications  
# This journal is © The Royal Society of Chemistry 2005

|         |     |     |     |     |     |     |
|---------|-----|-----|-----|-----|-----|-----|
| C (80)  | 26  | 19  | 47  | -1  | 7   | 0   |
| C (81)  | 42  | 37  | 26  | 20  | -13 | -7  |
| C (82)  | 87  | 66  | 28  | 22  | -9  | -2  |
| C (83)  | 29  | 58  | 60  | 11  | -3  | -6  |
| C (84)  | 13  | 13  | 72  | -4  | 5   | 3   |
| C (85)  | 31  | 20  | 99  | -2  | 10  | 9   |
| C (86)  | 35  | 24  | 58  | 9   | -7  | -3  |
| C (87)  | 21  | 33  | 15  | -7  | 6   | -10 |
| C (88)  | 24  | 24  | 22  | 1   | 2   | -11 |
| C (89)  | 34  | 45  | 12  | 5   | 7   | -5  |
| C (90)  | 38  | 51  | 18  | -13 | 19  | -6  |
| C (91)  | 32  | 34  | 29  | -15 | 6   | -12 |
| C (92)  | 19  | 27  | 28  | -4  | 7   | -6  |
| C (93)  | 34  | 29  | 11  | 4   | -3  | 2   |
| C (94)  | 45  | 48  | 21  | -2  | -1  | -2  |
| C (95)  | 32  | 42  | 20  | -3  | 1   | -1  |
| C (96)  | 30  | 21  | 31  | 9   | 12  | 1   |
| C (97)  | 41  | 41  | 53  | 5   | 7   | 13  |
| C (98)  | 72  | 17  | 49  | -5  | 7   | -3  |
| C (99)  | 13  | 13  | 26  | -4  | -5  | -2  |
| C (100) | 20  | 23  | 13  | -1  | 0   | -2  |
| C (101) | 25  | 15  | 23  | -6  | 0   | -1  |
| C (102) | 28  | 32  | 29  | -4  | 2   | 5   |
| C (103) | 36  | 34  | 24  | -17 | 3   | -6  |
| C (104) | 24  | 35  | 14  | -9  | -1  | -11 |
| C (105) | 29  | 22  | 16  | 3   | 1   | -1  |
| C (106) | 14  | 32  | 28  | -7  | 3   | 5   |
| C (107) | 27  | 37  | 33  | -16 | 12  | 2   |
| C (108) | 45  | 60  | 31  | 1   | 2   | 14  |
| C (109) | 14  | 32  | 20  | -11 | -5  | 1   |
| C (110) | 27  | 32  | 48  | -5  | -15 | 8   |
| C (111) | 10  | 40  | 42  | -10 | 2   | -4  |
| C (112) | 22  | 26  | 13  | 1   | 5   | -12 |
| C (113) | 15  | 24  | 17  | 1   | 8   | -3  |
| C (114) | 34  | 29  | 20  | -1  | 7   | 0   |
| C (115) | 37  | 46  | 16  | -6  | 10  | -4  |
| C (116) | 25  | 20  | 29  | 10  | 2   | 0   |
| C (117) | 24  | 12  | 17  | 6   | 1   | -3  |
| C (118) | 18  | 23  | 29  | -5  | 10  | -5  |
| C (119) | 37  | 26  | 31  | 0   | 16  | 6   |
| C (120) | 37  | 32  | 41  | -6  | -2  | 0   |
| C (121) | 25  | 12  | 22  | 9   | 6   | 2   |
| C (122) | 37  | 34  | 34  | 1   | 7   | 11  |
| C (123) | 45  | 26  | 45  | -10 | 19  | -3  |
| C (124) | 13  | 11  | 28  | -3  | 2   | -2  |
| C (125) | 61  | 54  | 13  | 7   | -14 | -7  |
| C (126) | 97  | 44  | 19  | 16  | 7   | 4   |
| C (127) | 78  | 42  | 26  | 3   | 23  | -11 |
| C (128) | 37  | 37  | 24  | -2  | 16  | -11 |
| C (129) | 93  | 97  | 197 | -66 | 34  | -10 |
| C (130) | 66  | 60  | 236 | -65 | -64 | 22  |
| C (131) | 74  | 48  | 132 | -21 | 19  | -16 |
| C (132) | 64  | 160 | 53  | -31 | 14  | -28 |
| C (133) | 48  | 55  | 146 | 8   | -37 | -3  |
| C (134) | 34  | 59  | 34  | 4   | 5   | 6   |
| C (135) | 34  | 29  | 58  | 9   | 14  | 10  |
| C (136) | 44  | 65  | 78  | 23  | 3   | 6   |
| C (137) | 120 | 80  | 47  | -33 | -27 | 17  |
| C (138) | 65  | 88  | 87  | -24 | 27  | -18 |

# Supplementary Material (ESI) for Chemical Communications  
# This journal is © The Royal Society of Chemistry 2005

|         |     |     |     |      |     |      |
|---------|-----|-----|-----|------|-----|------|
| C (139) | 63  | 130 | 61  | -28  | -5  | 15   |
| C (140) | 118 | 70  | 99  | -22  | 50  | 19   |
| C (141) | 66  | 55  | 46  | 17   | 10  | 3    |
| C (142) | 80  | 83  | 69  | 27   | 29  | 25   |
| C (143) | 123 | 67  | 123 | -14  | 41  | -51  |
| C (144) | 103 | 41  | 69  | 8    | 10  | -10  |
| C (145) | 118 | 77  | 41  | 0    | -15 | 31   |
| C (146) | 175 | 75  | 117 | 21   | 117 | 4    |
| C (147) | 82  | 402 | 110 | -110 | 66  | -130 |
| C (148) | 53  | 86  | 298 | 98   | -50 | -18  |

---

Table 5. Hydrogen coordinates (  $\times 10^4$ ) and isotropic displacement parameters ( $\text{\AA}^2 \times 10^3$ ) for [Na(THF) 5] [Sm(I) 2 (DippForm) 2 (THF) ] .

|        | x    | y     | z    | U (eq) |
|--------|------|-------|------|--------|
| H(3)   | 2624 | 12689 | 2306 | 48     |
| H(4)   | 1781 | 12595 | 2138 | 61     |
| H(5)   | 1557 | 11857 | 1631 | 58     |
| H(7)   | 3628 | 11633 | 1916 | 48     |
| H(8A)  | 3390 | 12676 | 2480 | 87     |
| H(8B)  | 3904 | 12139 | 2423 | 87     |
| H(8C)  | 3399 | 11562 | 2469 | 87     |
| H(9A)  | 3536 | 13028 | 1630 | 97     |
| H(9B)  | 3990 | 13049 | 1890 | 97     |
| H(9C)  | 3477 | 13566 | 1964 | 97     |
| H(10)  | 2376 | 10661 | 1129 | 35     |
| H(11A) | 1733 | 9921  | 1428 | 82     |
| H(11B) | 1611 | 9986  | 1049 | 82     |
| H(11C) | 1352 | 10692 | 1290 | 82     |
| H(12A) | 1629 | 12068 | 1020 | 65     |
| H(12B) | 1853 | 11413 | 749  | 65     |
| H(12C) | 2199 | 12182 | 923  | 65     |
| H(15)  | 3739 | 10845 | -55  | 43     |
| H(16)  | 4208 | 12260 | -53  | 55     |
| H(17)  | 4380 | 13033 | 426  | 43     |
| H(19)  | 3396 | 9619  | 619  | 37     |
| H(20A) | 3291 | 9687  | -60  | 57     |
| H(20B) | 3152 | 8814  | 159  | 57     |
| H(20C) | 3722 | 9139  | 136  | 57     |
| H(21A) | 2721 | 10650 | 651  | 58     |
| H(21B) | 2543 | 9742  | 456  | 58     |
| H(21C) | 2658 | 10683 | 267  | 58     |
| H(22)  | 4068 | 12264 | 1225 | 36     |
| H(23A) | 4913 | 12144 | 1114 | 64     |
| H(23B) | 4832 | 13143 | 1274 | 64     |
| H(23C) | 4889 | 13056 | 893  | 64     |
| H(24A) | 4036 | 13930 | 1249 | 73     |
| H(24B) | 3565 | 13521 | 1049 | 73     |
| H(24C) | 4021 | 13972 | 864  | 73     |
| H(25)  | 3132 | 11947 | 1095 | 21     |
| H(28)  | 3836 | 6159  | 2401 | 36     |
| H(29)  | 4650 | 6304  | 2610 | 33     |
| H(30)  | 5218 | 7209  | 2357 | 29     |
| H(32)  | 3296 | 7578  | 1785 | 34     |
| H(33A) | 3017 | 6126  | 2207 | 63     |
| H(33B) | 2652 | 6849  | 2026 | 63     |
| H(33C) | 3016 | 7196  | 2313 | 63     |
| H(34A) | 3463 | 5611  | 1720 | 78     |
| H(34B) | 3638 | 6373  | 1467 | 78     |
| H(34C) | 3055 | 6193  | 1515 | 78     |
| H(35)  | 4998 | 8722  | 1686 | 30     |
| H(36A) | 5682 | 8434  | 2217 | 61     |
| H(36B) | 5245 | 9195  | 2224 | 61     |
| H(36C) | 5682 | 9292  | 1972 | 61     |
| H(37A) | 5737 | 8060  | 1540 | 52     |



# Supplementary Material (ESI) for Chemical Communications  
# This journal is © The Royal Society of Chemistry 2005

|         |      |       |      |    |
|---------|------|-------|------|----|
| H (37B) | 5319 | 7264  | 1521 | 52 |
| H (37C) | 5710 | 7299  | 1820 | 52 |
| H (40)  | 5025 | 9062  | 199  | 33 |
| H (41)  | 4690 | 7769  | -74  | 34 |
| H (42)  | 4131 | 6806  | 195  | 33 |
| H (44)  | 4641 | 10019 | 932  | 27 |
| H (45A) | 5141 | 11076 | 683  | 47 |
| H (45B) | 4792 | 10640 | 402  | 47 |
| H (45C) | 5360 | 10304 | 449  | 47 |
| H (46A) | 5599 | 9176  | 870  | 54 |
| H (46B) | 5214 | 8890  | 1140 | 54 |
| H (46C) | 5453 | 9910  | 1141 | 54 |
| H (47)  | 3606 | 7203  | 958  | 28 |
| H (48A) | 3106 | 7452  | 477  | 55 |
| H (48B) | 2971 | 6505  | 657  | 55 |
| H (48C) | 3301 | 6478  | 343  | 55 |
| H (49A) | 4057 | 5719  | 621  | 57 |
| H (49B) | 3645 | 5556  | 886  | 57 |
| H (49C) | 4172 | 6012  | 987  | 57 |
| H (50)  | 4475 | 7477  | 1289 | 25 |
| H (51A) | 3789 | 10001 | 2314 | 45 |
| H (51B) | 3779 | 8885  | 2295 | 45 |
| H (52A) | 3265 | 9840  | 2730 | 58 |
| H (52B) | 3119 | 8787  | 2628 | 58 |
| H (53A) | 2396 | 9558  | 2448 | 46 |
| H (53B) | 2699 | 10484 | 2357 | 46 |
| H (54A) | 2637 | 8791  | 1994 | 34 |
| H (54B) | 2565 | 9836  | 1859 | 34 |
| H (55A) | 3326 | 11271 | 3979 | 64 |
| H (55B) | 3417 | 10442 | 4234 | 64 |
| H (56A) | 2560 | 10151 | 4272 | 61 |
| H (56B) | 2538 | 11257 | 4205 | 61 |
| H (57A) | 2074 | 10163 | 3795 | 50 |
| H (57B) | 2368 | 11047 | 3655 | 50 |
| H (58A) | 2675 | 9161  | 3661 | 56 |
| H (58B) | 2786 | 9937  | 3394 | 56 |
| H (59A) | 4261 | 7334  | 4336 | 76 |
| H (59B) | 4035 | 7033  | 3989 | 76 |
| H (60A) | 3364 | 6319  | 4201 | 55 |
| H (60B) | 3725 | 6246  | 4518 | 55 |
| H (61A) | 2880 | 7174  | 4527 | 49 |
| H (61B) | 3348 | 7456  | 4761 | 49 |
| H (62A) | 3008 | 8339  | 4201 | 71 |
| H (62B) | 3331 | 8776  | 4495 | 71 |
| H (63A) | 4891 | 9574  | 4516 | 83 |
| H (63B) | 4306 | 9447  | 4573 | 83 |
| H (64A) | 4885 | 10826 | 4782 | 90 |
| H (64B) | 4292 | 10718 | 4829 | 90 |
| H (65A) | 4111 | 11707 | 4427 | 66 |
| H (65B) | 4690 | 12007 | 4450 | 66 |
| H (66A) | 4309 | 11258 | 3928 | 51 |
| H (66B) | 4891 | 11118 | 4028 | 51 |
| H (67A) | 5226 | 9820  | 3525 | 53 |
| H (67B) | 5120 | 10692 | 3289 | 53 |
| H (68A) | 5169 | 8778  | 3114 | 61 |
| H (68B) | 5430 | 9644  | 2939 | 61 |
| H (69A) | 4693 | 10033 | 2653 | 62 |
| H (69B) | 4519 | 8985  | 2732 | 62 |
| H (70A) | 4162 | 10599 | 3004 | 52 |
| H (70B) | 3957 | 9563  | 3060 | 52 |
| H (71A) | 4497 | 7293  | 3409 | 38 |

# Supplementary Material (ESI) for Chemical Communications  
# This journal is © The Royal Society of Chemistry 2005

|         |       |       |      |    |
|---------|-------|-------|------|----|
| H (71B) | 4344  | 7600  | 3047 | 38 |
| H (72A) | 3911  | 6124  | 3411 | 42 |
| H (72B) | 4056  | 6096  | 3038 | 42 |
| H (73A) | 3365  | 6978  | 2878 | 43 |
| H (73B) | 3131  | 6402  | 3170 | 43 |
| H (74A) | 3170  | 8216  | 3176 | 45 |
| H (74B) | 3174  | 7622  | 3504 | 45 |
| H (77)  | 7728  | 6535  | 2106 | 48 |
| H (78)  | 6882  | 6617  | 1970 | 50 |
| H (79)  | 6603  | 7624  | 1570 | 45 |
| H (81)  | 8697  | 7985  | 1787 | 42 |
| H (82A) | 8609  | 7764  | 2334 | 91 |
| H (82B) | 9058  | 7118  | 2221 | 91 |
| H (82C) | 8522  | 6670  | 2285 | 91 |
| H (83A) | 8589  | 6010  | 1684 | 73 |
| H (83B) | 9101  | 6570  | 1651 | 73 |
| H (83C) | 8644  | 6759  | 1403 | 73 |
| H (84)  | 7351  | 9285  | 1152 | 39 |
| H (85A) | 6377  | 9068  | 1413 | 75 |
| H (85B) | 6572  | 9966  | 1227 | 75 |
| H (85C) | 6801  | 9714  | 1577 | 75 |
| H (86A) | 7116  | 8020  | 811  | 58 |
| H (86B) | 6725  | 8855  | 762  | 58 |
| H (86C) | 6582  | 7967  | 973  | 58 |
| H (89)  | 8589  | 9691  | -107 | 37 |
| H (90)  | 9064  | 8389  | -223 | 43 |
| H (91)  | 9332  | 7383  | 196  | 38 |
| H (93)  | 8310  | 10582 | 660  | 30 |
| H (94A) | 8530  | 11367 | 185  | 57 |
| H (94B) | 7954  | 11567 | 248  | 57 |
| H (94C) | 8104  | 10826 | -19  | 57 |
| H (95A) | 7555  | 9599  | 280  | 46 |
| H (95B) | 7427  | 10432 | 520  | 46 |
| H (95C) | 7652  | 9477  | 660  | 46 |
| H (96)  | 9078  | 7666  | 1027 | 33 |
| H (97A) | 9867  | 7185  | 614  | 67 |
| H (97B) | 9855  | 6884  | 985  | 67 |
| H (97C) | 9894  | 7961  | 890  | 67 |
| H (98A) | 8610  | 6511  | 771  | 69 |
| H (98B) | 9103  | 6066  | 936  | 69 |
| H (98C) | 9073  | 6242  | 556  | 69 |
| H (99)  | 8127  | 8026  | 982  | 21 |
| H (102) | 8875  | 13355 | 2518 | 36 |
| H (103) | 9714  | 13361 | 2670 | 38 |
| H (104) | 10288 | 12602 | 2356 | 29 |
| H (106) | 8322  | 12075 | 1857 | 30 |
| H (10A) | 8069  | 13075 | 2422 | 48 |
| H (10B) | 8074  | 11965 | 2393 | 48 |
| H (10C) | 7677  | 12562 | 2185 | 48 |
| H (10D) | 8359  | 14018 | 1946 | 68 |
| H (10E) | 7943  | 13476 | 1734 | 68 |
| H (10F) | 8512  | 13477 | 1627 | 68 |
| H (109) | 10013 | 11138 | 1668 | 27 |
| H (11D) | 10753 | 10587 | 1899 | 54 |
| H (11E) | 10323 | 10490 | 2156 | 54 |
| H (11F) | 10722 | 11317 | 2188 | 54 |
| H (11G) | 10702 | 12624 | 1804 | 46 |
| H (11H) | 10269 | 12684 | 1531 | 46 |
| H (11I) | 10712 | 11945 | 1499 | 46 |
| H (114) | 9908  | 11235 | 174  | 33 |
| H (115) | 9564  | 12600 | -10  | 39 |

# Supplementary Material (ESI) for Chemical Communications  
# This journal is © The Royal Society of Chemistry 2005

|        |       |       |      |     |
|--------|-------|-------|------|-----|
| H(116) | 9052  | 13457 | 323  | 30  |
| H(118) | 9618  | 10003 | 857  | 28  |
| H(11J) | 9746  | 9594  | 312  | 46  |
| H(11K) | 10157 | 9146  | 553  | 46  |
| H(11L) | 10294 | 10036 | 342  | 46  |
| H(12D) | 10458 | 10084 | 1049 | 55  |
| H(12E) | 10184 | 11043 | 1127 | 55  |
| H(12F) | 10554 | 10984 | 833  | 55  |
| H(12I) | 8604  | 12749 | 1086 | 23  |
| H(12G) | 8277  | 13795 | 540  | 53  |
| H(12H) | 7977  | 13650 | 863  | 53  |
| H(12I) | 8061  | 12790 | 627  | 53  |
| H(12J) | 9238  | 13856 | 1151 | 57  |
| H(12K) | 8706  | 14365 | 1150 | 57  |
| H(12L) | 9039  | 14401 | 837  | 57  |
| H(124) | 9449  | 12385 | 1352 | 21  |
| H(12M) | 8838  | 10557 | 2315 | 51  |
| H(12N) | 8889  | 9454  | 2254 | 51  |
| H(12O) | 8207  | 10369 | 2643 | 64  |
| H(12P) | 8398  | 9309  | 2672 | 64  |
| H(12Q) | 7817  | 8792  | 2297 | 58  |
| H(12R) | 7502  | 9614  | 2462 | 58  |
| H(12S) | 7640  | 9724  | 1865 | 39  |
| H(12T) | 7698  | 10658 | 2076 | 39  |
| H(12U) | 8355  | 8727  | 3621 | 154 |
| H(12V) | 8322  | 9531  | 3352 | 154 |
| H(13A) | 7469  | 9710  | 3400 | 147 |
| H(13B) | 7504  | 8640  | 3511 | 147 |
| H(13C) | 7454  | 8963  | 3992 | 101 |
| H(13D) | 7150  | 9840  | 3840 | 101 |
| H(13E) | 7935  | 10028 | 4177 | 111 |
| H(13F) | 7761  | 10756 | 3905 | 111 |
| H(13G) | 8357  | 11703 | 3076 | 101 |
| H(13H) | 8119  | 11934 | 3416 | 101 |
| H(13I) | 8172  | 13395 | 3333 | 51  |
| H(13J) | 8322  | 13155 | 2970 | 51  |
| H(13K) | 9084  | 13742 | 3095 | 48  |
| H(13L) | 8968  | 13766 | 3474 | 48  |
| H(13M) | 9366  | 12238 | 3119 | 75  |
| H(13N) | 9511  | 12530 | 3484 | 75  |
| H(13O) | 8921  | 11419 | 4681 | 100 |
| H(13P) | 8512  | 10809 | 4482 | 100 |
| H(13Q) | 7938  | 12077 | 4445 | 96  |
| H(13R) | 8187  | 12268 | 4799 | 96  |
| H(13S) | 8286  | 13530 | 4375 | 102 |
| H(13T) | 8766  | 13280 | 4602 | 102 |
| H(14A) | 8572  | 12757 | 3960 | 114 |
| H(14B) | 9102  | 13011 | 4131 | 114 |
| H(14C) | 9649  | 10610 | 4540 | 67  |
| H(14D) | 10109 | 9913  | 4480 | 67  |
| H(14E) | 9210  | 9489  | 4793 | 92  |
| H(14F) | 9731  | 8931  | 4824 | 92  |
| H(14G) | 9403  | 7853  | 4460 | 124 |
| H(14H) | 8916  | 8492  | 4392 | 124 |
| H(14I) | 9266  | 8670  | 3938 | 85  |
| H(14J) | 9818  | 8512  | 4091 | 85  |
| H(14K) | 9230  | 9337  | 2999 | 95  |
| H(14L) | 9081  | 10423 | 2983 | 95  |
| H(14M) | 9783  | 9758  | 2658 | 144 |
| H(14N) | 9780  | 10819 | 2777 | 144 |
| H(14O) | 10386 | 9410  | 2973 | 236 |

# Supplementary Material (ESI) for Chemical Communications  
# This journal is © The Royal Society of Chemistry 2005

|         |       |       |      |     |
|---------|-------|-------|------|-----|
| H (14P) | 10470 | 10515 | 3009 | 236 |
| H (14Q) | 10268 | 10439 | 3465 | 176 |
| H (14R) | 10177 | 9346  | 3428 | 176 |

---

## Full data

### Compound 3:

Table 1. Crystal data and structure refinement for [Sm(DippForm)<sub>3</sub>].5/2C<sub>7</sub>H<sub>8</sub>.

|                                   |                                                                                                                           |
|-----------------------------------|---------------------------------------------------------------------------------------------------------------------------|
| Identification code               | Sm(DippForm) <sub>3</sub> ].5/2C <sub>7</sub> H <sub>8</sub>                                                              |
| Empirical formula                 | C <sub>92.50</sub> H <sub>125</sub> N <sub>6</sub> Sm                                                                     |
| Formula weight                    | 1471.34                                                                                                                   |
| Temperature                       | 123(2) K                                                                                                                  |
| Wavelength                        | 0.71073 Å                                                                                                                 |
| Crystal system, space group       | Monoclinic, P2(1)/n                                                                                                       |
| Unit cell dimensions              | a = 13.1662(2) Å    alpha = 90 deg.<br>b = 37.9133(8) Å    beta = 96.1070(10) deg.<br>c = 16.4994(3) Å    gamma = 90 deg. |
| Volume                            | 8189.3(3) Å <sup>3</sup>                                                                                                  |
| Z, Calculated density             | 4, 1.193 Mg/m <sup>3</sup>                                                                                                |
| Absorption coefficient            | 0.765 mm <sup>-1</sup>                                                                                                    |
| F(000)                            | 3136                                                                                                                      |
| Crystal size                      | 0.20 x 0.20 x 0.10 mm                                                                                                     |
| Theta range for data collection   | 1.65 to 28.37 deg.                                                                                                        |
| Limiting indices                  | -17<=h<=16, -45<=k<=50, -22<=l<=20                                                                                        |
| Reflections collected / unique    | 44716 / 18160 [R(int) = 0.1993]                                                                                           |
| Completeness to theta = 26.00     | 92.0 %                                                                                                                    |
| Absorption correction             | empirical                                                                                                                 |
| Max. and min. transmission        | 0.9274 and 0.8621                                                                                                         |
| Refinement method                 | Full-matrix least-squares on F <sup>2</sup>                                                                               |
| Data / restraints / parameters    | 18160 / 0 / 939                                                                                                           |
| Goodness-of-fit on F <sup>2</sup> | 0.956                                                                                                                     |
| Final R indices [I>2sigma(I)]     | R1 = 0.0938, wR2 = 0.1435                                                                                                 |
| R indices (all data)              | R1 = 0.2713, wR2 = 0.2011                                                                                                 |
| Largest diff. peak and hole       | 1.200 and -1.646 e.Å <sup>-3</sup>                                                                                        |

Note: All hydrogen atoms placed in calculated positions (riding model).

# Supplementary Material (ESI) for Chemical Communications  
# This journal is © The Royal Society of Chemistry 2005

Table 2. Atomic coordinates ( $\times 10^4$ ) and equivalent isotropic displacement parameters ( $\text{Å}^2 \times 10^3$ ) for  $[\text{Sm}(\text{DippForm})_3] \cdot 5/2\text{C}_7\text{H}_8$ .  $U(\text{eq})$  is defined as one third of the trace of the orthogonalized  $U_{ij}$  tensor.

|       | x         | y        | z         | U (eq) |
|-------|-----------|----------|-----------|--------|
| Sm(1) | 7695 (1)  | 1438 (1) | 8934 (1)  | 23 (1) |
| N(1)  | 8494 (4)  | 2002 (2) | 8648 (3)  | 19 (2) |
| N(2)  | 6877 (4)  | 2015 (2) | 9090 (4)  | 24 (2) |
| N(3)  | 8384 (4)  | 1043 (2) | 7943 (4)  | 22 (2) |
| N(4)  | 6701 (4)  | 1210 (2) | 7691 (4)  | 22 (2) |
| N(5)  | 8715 (4)  | 1279 (2) | 10224 (4) | 23 (2) |
| N(6)  | 7038 (4)  | 1103 (2) | 10043 (4) | 21 (2) |
| C(1)  | 9278 (6)  | 2226 (2) | 8364 (5)  | 26 (2) |
| C(2)  | 10255 (6) | 2222 (2) | 8808 (5)  | 31 (2) |
| C(3)  | 10984 (6) | 2458 (3) | 8563 (5)  | 37 (3) |
| C(4)  | 10776 (6) | 2689 (3) | 7928 (6)  | 43 (3) |
| C(5)  | 9827 (6)  | 2688 (2) | 7487 (5)  | 39 (3) |
| C(6)  | 9053 (6)  | 2455 (2) | 7696 (5)  | 28 (2) |
| C(7)  | 10493 (5) | 2000 (2) | 9545 (5)  | 25 (2) |
| C(8)  | 11618 (5) | 1904 (2) | 9730 (5)  | 37 (3) |
| C(9)  | 10141 (6) | 2179 (3) | 10301 (5) | 41 (3) |
| C(10) | 8024 (6)  | 2467 (3) | 7169 (5)  | 35 (2) |
| C(11) | 8134 (6)  | 2433 (3) | 6269 (5)  | 51 (3) |
| C(12) | 7432 (6)  | 2813 (2) | 7286 (5)  | 46 (3) |
| C(13) | 6095 (6)  | 2260 (2) | 9288 (5)  | 28 (2) |
| C(14) | 5113 (6)  | 2215 (3) | 8866 (5)  | 29 (2) |
| C(15) | 4350 (6)  | 2457 (3) | 9033 (5)  | 38 (3) |
| C(16) | 4560 (7)  | 2728 (3) | 9579 (6)  | 48 (3) |
| C(17) | 5516 (7)  | 2761 (3) | 9992 (5)  | 43 (3) |
| C(18) | 6299 (6)  | 2527 (2) | 9881 (5)  | 30 (2) |
| C(19) | 4879 (5)  | 1942 (3) | 8210 (5)  | 35 (3) |
| C(20) | 3758 (5)  | 1838 (3) | 8067 (5)  | 41 (3) |
| C(21) | 5244 (5)  | 2077 (2) | 7401 (5)  | 39 (3) |
| C(22) | 7338 (6)  | 2577 (3) | 10373 (5) | 41 (3) |
| C(23) | 7233 (7)  | 2600 (3) | 11284 (5) | 59 (3) |
| C(24) | 7901 (7)  | 2909 (3) | 10137 (6) | 62 (3) |
| C(25) | 7688 (6)  | 2185 (2) | 8837 (4)  | 26 (2) |
| C(26) | 9201 (5)  | 830 (3)  | 7645 (5)  | 26 (2) |
| C(27) | 10075 (6) | 1014 (3) | 7438 (5)  | 32 (2) |
| C(28) | 10842 (6) | 806 (3)  | 7152 (5)  | 38 (3) |
| C(29) | 10776 (7) | 452 (3)  | 7068 (6)  | 52 (3) |
| C(30) | 9907 (7)  | 280 (3)  | 7258 (6)  | 52 (3) |
| C(31) | 9121 (6)  | 466 (3)  | 7560 (5)  | 36 (2) |
| C(32) | 10171 (6) | 1409 (3) | 7475 (5)  | 33 (2) |
| C(33) | 11259 (5) | 1550 (2) | 7541 (5)  | 42 (3) |
| C(34) | 9557 (6)  | 1581 (3) | 6736 (6)  | 47 (3) |
| C(35) | 8194 (6)  | 250 (3)  | 7786 (6)  | 41 (3) |
| C(36) | 8514 (7)  | -79 (3)  | 8284 (6)  | 65 (3) |
| C(37) | 7507 (7)  | 133 (3)  | 7046 (6)  | 60 (3) |
| C(38) | 5774 (6)  | 1169 (2) | 7145 (5)  | 26 (2) |
| C(39) | 4907 (6)  | 1029 (2) | 7453 (5)  | 29 (2) |
| C(40) | 4016 (6)  | 999 (2)  | 6928 (6)  | 40 (3) |
| C(41) | 3956 (7)  | 1101 (3) | 6124 (5)  | 52 (3) |
| C(42) | 4815 (6)  | 1241 (3) | 5831 (5)  | 42 (3) |
| C(43) | 5728 (6)  | 1281 (2) | 6342 (5)  | 28 (2) |
| C(44) | 4968 (6)  | 885 (3)  | 8307 (5)  | 31 (2) |

# Supplementary Material (ESI) for Chemical Communications  
# This journal is © The Royal Society of Chemistry 2005

|         |            |            |           |          |
|---------|------------|------------|-----------|----------|
| C (45)  | 3931 (5)   | 866 (2)    | 8658 (5)  | 36 (2)   |
| C (46)  | 5452 (6)   | 521 (3)    | 8374 (6)  | 56 (3)   |
| C (47)  | 6613 (6)   | 1445 (3)   | 5952 (5)  | 32 (2)   |
| C (48)  | 6307 (7)   | 1778 (3)   | 5463 (5)  | 61 (3)   |
| C (49)  | 7103 (6)   | 1187 (3)   | 5386 (5)  | 48 (3)   |
| C (50)  | 7507 (6)   | 1025 (2)   | 7480 (5)  | 25 (2)   |
| C (51)  | 9651 (6)   | 1272 (2)   | 10787 (5) | 31 (2)   |
| C (52)  | 10521 (6)  | 1108 (2)   | 10524 (5) | 26 (2)   |
| C (53)  | 11399 (6)  | 1094 (3)   | 11072 (6) | 41 (3)   |
| C (54)  | 11423 (7)  | 1240 (3)   | 11849 (6) | 54 (3)   |
| C (55)  | 10566 (6)  | 1405 (3)   | 12063 (5) | 52 (3)   |
| C (56)  | 9675 (6)   | 1430 (3)   | 11561 (5) | 37 (2)   |
| C (57)  | 10492 (5)  | 938 (3)    | 9713 (5)  | 35 (3)   |
| C (58)  | 11532 (5)  | 906 (3)    | 9380 (5)  | 48 (3)   |
| C (59)  | 10031 (6)  | 570 (3)    | 9732 (5)  | 43 (3)   |
| C (60)  | 8772 (6)   | 1618 (3)   | 11856 (5) | 37 (2)   |
| C (61)  | 9083 (7)   | 1976 (3)   | 12243 (6) | 70 (4)   |
| C (62)  | 8275 (6)   | 1405 (3)   | 12501 (5) | 61 (3)   |
| C (63)  | 6273 (5)   | 912 (2)    | 10415 (4) | 23 (2)   |
| C (64)  | 5371 (5)   | 1094 (3)   | 10587 (5) | 29 (2)   |
| C (65)  | 4636 (6)   | 906 (3)    | 10980 (5) | 34 (2)   |
| C (66)  | 4774 (6)   | 557 (3)    | 11202 (5) | 38 (2)   |
| C (67)  | 5643 (6)   | 383 (3)    | 11029 (5) | 37 (2)   |
| C (68)  | 6391 (6)   | 556 (3)    | 10620 (5) | 32 (2)   |
| C (69)  | 5222 (5)   | 1481 (2)   | 10407 (5) | 26 (2)   |
| C (70)  | 4114 (5)   | 1603 (2)   | 10341 (5) | 38 (3)   |
| C (71)  | 5866 (6)   | 1706 (2)   | 11034 (5) | 38 (2)   |
| C (72)  | 7323 (6)   | 330 (3)    | 10469 (5) | 36 (3)   |
| C (73)  | 7033 (6)   | -9 (3)     | 10023 (6) | 50 (3)   |
| C (74)  | 8029 (6)   | 249 (3)    | 11247 (5) | 51 (3)   |
| C (75)  | 7924 (5)   | 1113 (2)   | 10498 (5) | 25 (2)   |
| C (76)  | 3795 (10)  | -771 (4)   | 6853 (7)  | 114 (5)  |
| C (77)  | 4787 (10)  | -952 (5)   | 6660 (7)  | 76 (4)   |
| C (78)  | 4892 (11)  | -1324 (4)  | 6682 (6)  | 79 (4)   |
| C (79)  | 5800 (12)  | -1475 (4)  | 6507 (6)  | 83 (4)   |
| C (80)  | 6599 (10)  | -1277 (4)  | 6309 (7)  | 83 (4)   |
| C (81)  | 6481 (10)  | -905 (4)   | 6274 (7)  | 80 (4)   |
| C (82)  | 5584 (11)  | -749 (4)   | 6452 (6)  | 81 (4)   |
| C (83A) | -1340 (30) | -1023 (14) | 5070 (30) | 360 (40) |
| C (83B) | 1450 (30)  | -203 (13)  | 5140 (20) | 170 (30) |
| C (84)  | -630 (40)  | -810 (20)  | 5322 (15) | 770 (90) |
| C (85)  | 340 (20)   | -695 (9)   | 5077 (15) | 200 (13) |
| C (87)  | 963 (15)   | -510 (5)   | 6359 (13) | 159 (7)  |
| C (88)  | 50 (20)    | -725 (7)   | 6593 (16) | 222 (15) |
| C (89)  | -510 (30)  | -872 (12)  | 5810 (40) | 470 (50) |
| C (90)  | 3301 (19)  | 149 (8)    | 6079 (18) | 153 (15) |
| C (91)  | 4188 (14)  | 91 (5)     | 5485 (10) | 116 (6)  |
| C (92)  | 5076 (15)  | 265 (5)    | 5560 (10) | 121 (6)  |
| C (93)  | 5889 (13)  | 184 (4)    | 5084 (11) | 118 (6)  |
| C (94)  | 1010 (30)  | -455 (10)  | 5504 (15) | 235 (15) |

---

Table 3. Bond lengths [Å] and angles [deg] for  
[Sm(DippForm)3].5/2C7H8.

---

|             |           |
|-------------|-----------|
| Sm(1)-N(1)  | 2.448(6)  |
| Sm(1)-N(6)  | 2.460(6)  |
| Sm(1)-N(3)  | 2.462(6)  |
| Sm(1)-N(2)  | 2.463(7)  |
| Sm(1)-N(5)  | 2.467(6)  |
| Sm(1)-N(4)  | 2.469(6)  |
| Sm(1)-C(25) | 2.833(9)  |
| Sm(1)-C(75) | 2.848(8)  |
| Sm(1)-C(50) | 2.854(9)  |
| N(1)-C(25)  | 1.331(8)  |
| N(1)-C(1)   | 1.452(9)  |
| N(2)-C(25)  | 1.351(8)  |
| N(2)-C(13)  | 1.449(9)  |
| N(3)-C(50)  | 1.317(9)  |
| N(3)-C(26)  | 1.470(9)  |
| N(4)-C(50)  | 1.349(9)  |
| N(4)-C(38)  | 1.446(9)  |
| N(5)-C(75)  | 1.337(8)  |
| N(5)-C(51)  | 1.464(9)  |
| N(6)-C(75)  | 1.319(8)  |
| N(6)-C(63)  | 1.432(9)  |
| C(1)-C(6)   | 1.410(11) |
| C(1)-C(2)   | 1.411(10) |
| C(2)-C(3)   | 1.402(11) |
| C(2)-C(7)   | 1.485(11) |
| C(3)-C(4)   | 1.371(11) |
| C(4)-C(5)   | 1.377(11) |
| C(5)-C(6)   | 1.420(10) |
| C(6)-C(10)  | 1.530(10) |
| C(7)-C(8)   | 1.525(9)  |
| C(7)-C(9)   | 1.535(10) |
| C(10)-C(11) | 1.513(10) |
| C(10)-C(12) | 1.547(11) |
| C(13)-C(14) | 1.412(10) |
| C(13)-C(18) | 1.412(11) |
| C(14)-C(15) | 1.409(11) |
| C(14)-C(19) | 1.506(11) |
| C(15)-C(16) | 1.374(12) |
| C(16)-C(17) | 1.372(11) |
| C(17)-C(18) | 1.387(11) |
| C(18)-C(22) | 1.527(11) |
| C(19)-C(20) | 1.522(9)  |
| C(19)-C(21) | 1.553(10) |
| C(22)-C(23) | 1.525(11) |
| C(22)-C(24) | 1.533(11) |
| C(26)-C(31) | 1.391(11) |
| C(26)-C(27) | 1.417(10) |
| C(27)-C(28) | 1.402(10) |
| C(27)-C(32) | 1.504(12) |
| C(28)-C(29) | 1.351(12) |
| C(29)-C(30) | 1.381(11) |
| C(30)-C(31) | 1.388(11) |
| C(31)-C(35) | 1.549(11) |
| C(32)-C(33) | 1.523(10) |
| C(32)-C(34) | 1.535(11) |
| C(35)-C(37) | 1.507(11) |



# Supplementary Material (ESI) for Chemical Communications  
# This journal is © The Royal Society of Chemistry 2005

|                      |            |
|----------------------|------------|
| C (35) -C (36)       | 1.528 (12) |
| C (38) -C (43)       | 1.386 (10) |
| C (38) -C (39)       | 1.402 (10) |
| C (39) -C (40)       | 1.387 (10) |
| C (39) -C (44)       | 1.507 (10) |
| C (40) -C (41)       | 1.376 (11) |
| C (41) -C (42)       | 1.382 (11) |
| C (42) -C (43)       | 1.401 (10) |
| C (43) -C (47)       | 1.524 (10) |
| C (44) -C (46)       | 1.516 (12) |
| C (44) -C (45)       | 1.541 (9)  |
| C (47) -C (48)       | 1.528 (12) |
| C (47) -C (49)       | 1.542 (11) |
| C (51) -C (56)       | 1.407 (11) |
| C (51) -C (52)       | 1.413 (10) |
| C (52) -C (53)       | 1.390 (10) |
| C (52) -C (57)       | 1.481 (11) |
| C (53) -C (54)       | 1.394 (12) |
| C (54) -C (55)       | 1.370 (12) |
| C (55) -C (56)       | 1.366 (10) |
| C (56) -C (60)       | 1.512 (11) |
| C (57) -C (59)       | 1.523 (11) |
| C (57) -C (58)       | 1.533 (9)  |
| C (60) -C (61)       | 1.537 (12) |
| C (60) -C (62)       | 1.537 (11) |
| C (63) -C (68)       | 1.397 (11) |
| C (63) -C (64)       | 1.428 (10) |
| C (64) -C (65)       | 1.414 (10) |
| C (64) -C (69)       | 1.504 (11) |
| C (65) -C (66)       | 1.381 (11) |
| C (66) -C (67)       | 1.376 (10) |
| C (67) -C (68)       | 1.413 (10) |
| C (68) -C (72)       | 1.537 (11) |
| C (69) -C (70)       | 1.524 (9)  |
| C (69) -C (71)       | 1.526 (10) |
| C (72) -C (73)       | 1.512 (12) |
| C (72) -C (74)       | 1.535 (11) |
| C (76) -C (77)       | 1.539 (15) |
| C (77) -C (82)       | 1.376 (15) |
| C (77) -C (78)       | 1.415 (16) |
| C (78) -C (79)       | 1.384 (15) |
| C (79) -C (80)       | 1.359 (15) |
| C (80) -C (81)       | 1.421 (15) |
| C (81) -C (82)       | 1.380 (14) |
| C (83A) -C (84)      | 1.27 (6)   |
| C (83B) -C (94)      | 1.30 (4)   |
| C (84) -C (89)       | 0.83 (7)   |
| C (84) -C (85)       | 1.45 (5)   |
| C (85) -C (94)       | 1.41 (3)   |
| C (87) -C (94)       | 1.43 (2)   |
| C (87) -C (88)       | 1.53 (2)   |
| C (88) -C (89)       | 1.53 (4)   |
| C (90) -C (91)       | 1.62 (2)   |
| C (91) -C (92)       | 1.337 (18) |
| C (91) -C (93) #1    | 1.399 (18) |
| C (92) -C (93)       | 1.427 (17) |
| C (93) -C (91) #1    | 1.399 (18) |
| N (1) -Sm (1) -N (6) | 141.9 (2)  |
| N (1) -Sm (1) -N (3) | 101.9 (2)  |
| N (6) -Sm (1) -N (3) | 111.3 (2)  |

# Supplementary Material (ESI) for Chemical Communications  
# This journal is © The Royal Society of Chemistry 2005

|                        |            |
|------------------------|------------|
| N (1) -Sm (1) -N (2)   | 56.45 (18) |
| N (6) -Sm (1) -N (2)   | 100.9 (2)  |
| N (3) -Sm (1) -N (2)   | 143.7 (2)  |
| N (1) -Sm (1) -N (5)   | 100.1 (2)  |
| N (6) -Sm (1) -N (5)   | 55.53 (19) |
| N (3) -Sm (1) -N (5)   | 102.6 (2)  |
| N (2) -Sm (1) -N (5)   | 109.4 (2)  |
| N (1) -Sm (1) -N (4)   | 110.2 (2)  |
| N (6) -Sm (1) -N (4)   | 103.8 (2)  |
| N (3) -Sm (1) -N (4)   | 55.62 (19) |
| N (2) -Sm (1) -N (4)   | 101.4 (2)  |
| N (5) -Sm (1) -N (4)   | 145.3 (2)  |
| N (1) -Sm (1) -C (25)  | 28.00 (17) |
| N (6) -Sm (1) -C (25)  | 124.0 (2)  |
| N (3) -Sm (1) -C (25)  | 124.7 (2)  |
| N (2) -Sm (1) -C (25)  | 28.46 (17) |
| N (5) -Sm (1) -C (25)  | 107.0 (2)  |
| N (4) -Sm (1) -C (25)  | 107.7 (2)  |
| N (1) -Sm (1) -C (75)  | 123.2 (2)  |
| N (6) -Sm (1) -C (75)  | 27.55 (17) |
| N (3) -Sm (1) -C (75)  | 109.1 (2)  |
| N (2) -Sm (1) -C (75)  | 107.2 (2)  |
| N (5) -Sm (1) -C (75)  | 27.98 (18) |
| N (4) -Sm (1) -C (75)  | 126.6 (2)  |
|                        |            |
| C (25) -Sm (1) -C (75) | 118.9 (2)  |
| N (1) -Sm (1) -C (50)  | 108.5 (2)  |
| N (6) -Sm (1) -C (50)  | 109.6 (2)  |
| N (3) -Sm (1) -C (50)  | 27.44 (19) |
| N (2) -Sm (1) -C (50)  | 125.1 (2)  |
| N (5) -Sm (1) -C (50)  | 125.5 (2)  |
| N (4) -Sm (1) -C (50)  | 28.18 (19) |
| C (25) -Sm (1) -C (50) | 120.0 (2)  |
| C (75) -Sm (1) -C (50) | 121.0 (2)  |
| C (25) -N (1) -C (1)   | 112.5 (7)  |
| C (25) -N (1) -Sm (1)  | 92.3 (5)   |
| C (1) -N (1) -Sm (1)   | 155.0 (5)  |
| C (25) -N (2) -C (13)  | 111.7 (7)  |
| C (25) -N (2) -Sm (1)  | 91.2 (5)   |
| C (13) -N (2) -Sm (1)  | 157.1 (5)  |
| C (50) -N (3) -C (26)  | 113.9 (7)  |
| C (50) -N (3) -Sm (1)  | 93.1 (5)   |
| C (26) -N (3) -Sm (1)  | 152.9 (5)  |
| C (50) -N (4) -C (38)  | 114.7 (7)  |
| C (50) -N (4) -Sm (1)  | 92.0 (5)   |
| C (38) -N (4) -Sm (1)  | 153.2 (5)  |
| C (75) -N (5) -C (51)  | 114.2 (7)  |
| C (75) -N (5) -Sm (1)  | 92.1 (5)   |
| C (51) -N (5) -Sm (1)  | 153.7 (5)  |
| C (75) -N (6) -C (63)  | 112.9 (6)  |
| C (75) -N (6) -Sm (1)  | 92.9 (4)   |
| C (63) -N (6) -Sm (1)  | 154.2 (5)  |
| C (6) -C (1) -C (2)    | 121.0 (8)  |
| C (6) -C (1) -N (1)    | 121.0 (7)  |
| C (2) -C (1) -N (1)    | 117.8 (7)  |
| C (3) -C (2) -C (1)    | 117.3 (8)  |
| C (3) -C (2) -C (7)    | 120.3 (7)  |
| C (1) -C (2) -C (7)    | 122.2 (8)  |
| C (4) -C (3) -C (2)    | 122.7 (8)  |
| C (3) -C (4) -C (5)    | 120.0 (8)  |

# Supplementary Material (ESI) for Chemical Communications  
# This journal is © The Royal Society of Chemistry 2005

|                        |           |
|------------------------|-----------|
| C (4) -C (5) -C (6)    | 120.4 (8) |
| C (1) -C (6) -C (5)    | 118.5 (7) |
| C (1) -C (6) -C (10)   | 124.2 (8) |
| C (5) -C (6) -C (10)   | 117.2 (8) |
| C (2) -C (7) -C (8)    | 114.6 (6) |
| C (2) -C (7) -C (9)    | 111.1 (7) |
| C (8) -C (7) -C (9)    | 108.4 (6) |
| C (11) -C (10) -C (6)  | 112.5 (6) |
| C (11) -C (10) -C (12) | 107.3 (7) |
| C (6) -C (10) -C (12)  | 112.5 (7) |
| C (14) -C (13) -C (18) | 121.6 (8) |

|                        |            |
|------------------------|------------|
| C (14) -C (13) -N (2)  | 116.6 (8)  |
| C (18) -C (13) -N (2)  | 121.8 (7)  |
| C (15) -C (14) -C (13) | 117.4 (9)  |
| C (15) -C (14) -C (19) | 119.5 (7)  |
| C (13) -C (14) -C (19) | 122.9 (8)  |
| C (16) -C (15) -C (14) | 121.0 (9)  |
| C (17) -C (16) -C (15) | 120.3 (9)  |
| C (16) -C (17) -C (18) | 122.1 (9)  |
| C (17) -C (18) -C (13) | 117.4 (8)  |
| C (17) -C (18) -C (22) | 119.1 (8)  |
| C (13) -C (18) -C (22) | 123.5 (8)  |
| C (14) -C (19) -C (20) | 114.3 (7)  |
| C (14) -C (19) -C (21) | 109.4 (7)  |
| C (20) -C (19) -C (21) | 109.6 (7)  |
| C (23) -C (22) -C (18) | 111.2 (7)  |
| C (23) -C (22) -C (24) | 107.4 (8)  |
| C (18) -C (22) -C (24) | 113.5 (8)  |
| N (1) -C (25) -N (2)   | 120.1 (8)  |
| N (1) -C (25) -Sm (1)  | 59.7 (4)   |
| N (2) -C (25) -Sm (1)  | 60.4 (4)   |
| C (31) -C (26) -C (27) | 121.1 (8)  |
| C (31) -C (26) -N (3)  | 121.9 (7)  |
| C (27) -C (26) -N (3)  | 117.0 (8)  |
| C (28) -C (27) -C (26) | 116.0 (9)  |
| C (28) -C (27) -C (32) | 120.8 (8)  |
| C (26) -C (27) -C (32) | 123.1 (8)  |
| C (29) -C (28) -C (27) | 123.4 (9)  |
| C (28) -C (29) -C (30) | 119.5 (9)  |
| C (29) -C (30) -C (31) | 120.5 (10) |
| C (30) -C (31) -C (26) | 119.3 (8)  |
| C (30) -C (31) -C (35) | 117.0 (9)  |
| C (26) -C (31) -C (35) | 123.6 (8)  |
| C (27) -C (32) -C (33) | 115.4 (7)  |
| C (27) -C (32) -C (34) | 110.9 (7)  |
| C (33) -C (32) -C (34) | 108.6 (7)  |
| C (37) -C (35) -C (36) | 107.6 (8)  |
| C (37) -C (35) -C (31) | 112.4 (8)  |
| C (36) -C (35) -C (31) | 112.4 (8)  |
| C (43) -C (38) -C (39) | 120.5 (7)  |
| C (43) -C (38) -N (4)  | 120.7 (7)  |
| C (39) -C (38) -N (4)  | 118.7 (7)  |
| C (40) -C (39) -C (38) | 118.2 (8)  |
| C (40) -C (39) -C (44) | 120.8 (7)  |
| C (38) -C (39) -C (44) | 120.8 (7)  |
| C (41) -C (40) -C (39) | 122.5 (8)  |
| C (40) -C (41) -C (42) | 118.7 (8)  |
| C (41) -C (42) -C (43) | 120.8 (8)  |
| C (38) -C (43) -C (42) | 119.4 (7)  |

# Supplementary Material (ESI) for Chemical Communications  
# This journal is © The Royal Society of Chemistry 2005

|                         |            |
|-------------------------|------------|
| C (38) -C (43) -C (47)  | 124.8 (7)  |
| C (42) -C (43) -C (47)  | 115.8 (7)  |
| C (39) -C (44) -C (46)  | 112.3 (7)  |
| C (39) -C (44) -C (45)  | 114.0 (7)  |
| C (46) -C (44) -C (45)  | 108.2 (7)  |
| C (43) -C (47) -C (48)  | 113.0 (7)  |
| C (43) -C (47) -C (49)  | 112.6 (8)  |
| C (48) -C (47) -C (49)  | 107.9 (7)  |
| N (3) -C (50) -N (4)    | 119.3 (8)  |
| N (3) -C (50) -Sm (1)   | 59.5 (4)   |
| N (4) -C (50) -Sm (1)   | 59.8 (4)   |
| C (56) -C (51) -C (52)  | 121.7 (7)  |
| C (56) -C (51) -N (5)   | 120.3 (7)  |
| C (52) -C (51) -N (5)   | 117.9 (7)  |
| C (53) -C (52) -C (51)  | 117.6 (8)  |
| C (53) -C (52) -C (57)  | 120.7 (8)  |
| C (51) -C (52) -C (57)  | 121.7 (7)  |
| C (52) -C (53) -C (54)  | 121.2 (8)  |
| C (55) -C (54) -C (53)  | 118.7 (9)  |
| C (56) -C (55) -C (54)  | 123.6 (9)  |
| C (55) -C (56) -C (51)  | 117.1 (8)  |
| C (55) -C (56) -C (60)  | 119.5 (8)  |
| C (51) -C (56) -C (60)  | 123.4 (7)  |
| C (52) -C (57) -C (59)  | 110.5 (7)  |
| C (52) -C (57) -C (58)  | 114.9 (7)  |
| C (59) -C (57) -C (58)  | 107.9 (7)  |
| C (56) -C (60) -C (61)  | 111.6 (7)  |
| C (56) -C (60) -C (62)  | 112.4 (8)  |
| C (61) -C (60) -C (62)  | 106.9 (7)  |
| C (68) -C (63) -C (64)  | 119.6 (7)  |
| C (68) -C (63) -N (6)   | 121.8 (7)  |
| C (64) -C (63) -N (6)   | 118.6 (8)  |
| C (65) -C (64) -C (63)  | 118.1 (9)  |
| C (65) -C (64) -C (69)  | 120.0 (7)  |
| C (63) -C (64) -C (69)  | 121.8 (7)  |
| C (66) -C (65) -C (64)  | 121.8 (8)  |
| C (67) -C (66) -C (65)  | 119.6 (8)  |
| C (66) -C (67) -C (68)  | 121.0 (9)  |
| C (63) -C (68) -C (67)  | 119.9 (8)  |
| C (63) -C (68) -C (72)  | 124.7 (7)  |
| C (67) -C (68) -C (72)  | 115.4 (8)  |
| C (64) -C (69) -C (70)  | 114.5 (7)  |
| C (64) -C (69) -C (71)  | 111.1 (7)  |
| C (70) -C (69) -C (71)  | 109.7 (7)  |
| C (73) -C (72) -C (74)  | 109.5 (8)  |
| C (73) -C (72) -C (68)  | 112.8 (7)  |
| C (74) -C (72) -C (68)  | 113.6 (7)  |
| N (6) -C (75) -N (5)    | 119.5 (7)  |
| N (6) -C (75) -Sm (1)   | 59.6 (4)   |
| N (5) -C (75) -Sm (1)   | 59.9 (4)   |
| C (82) -C (77) -C (78)  | 119.3 (13) |
| C (82) -C (77) -C (76)  | 119.2 (16) |
| C (78) -C (77) -C (76)  | 121.5 (14) |
| C (79) -C (78) -C (77)  | 119.3 (13) |
| C (80) -C (79) -C (78)  | 122.0 (15) |
| C (79) -C (80) -C (81)  | 118.3 (14) |
| C (82) -C (81) -C (80)  | 120.6 (14) |
| C (77) -C (82) -C (81)  | 120.4 (14) |
| C (89) -C (84) -C (83A) | 102 (8)    |
| C (89) -C (84) -C (85)  | 106 (6)    |
| C (83A) -C (84) -C (85) | 138 (4)    |

# Supplementary Material (ESI) for Chemical Communications  
# This journal is © The Royal Society of Chemistry 2005

|                           |            |
|---------------------------|------------|
| C (94) -C (85) -C (84)    | 126 (3)    |
| C (94) -C (87) -C (88)    | 116 (2)    |
| C (87) -C (88) -C (89)    | 107 (3)    |
| C (84) -C (89) -C (88)    | 138 (8)    |
| C (92) -C (91) -C (93) #1 | 115.5 (17) |
| C (92) -C (91) -C (90)    | 123.8 (19) |
| C (93) #1 -C (91) -C (90) | 120 (2)    |
| C (91) -C (92) -C (93)    | 122.9 (17) |
| C (91) #1 -C (93) -C (92) | 121.6 (16) |
| C (83B) -C (94) -C (85)   | 122 (3)    |
| C (83B) -C (94) -C (87)   | 129 (4)    |
| C (85) -C (94) -C (87)    | 108 (3)    |

---

Symmetry transformations used to generate equivalent atoms:  
#1 -x+1,-y,-z+1

Table 4. Anisotropic displacement parameters ( $\text{Å}^2 \times 10^3$ ) for  
 [Sm(DippForm)<sub>3</sub>].5/2C<sub>7</sub>H<sub>8</sub>.

The anisotropic displacement factor exponent takes the form:  
 $-2 \pi^2 [ h^2 a^{*2} U_{11} + \dots + 2 h k a^* b^* U_{12} ]$

|       | U11   | U22    | U33   | U23    | U13    | U12    |
|-------|-------|--------|-------|--------|--------|--------|
| Sm(1) | 21(1) | 28(1)  | 22(1) | 1(1)   | 6(1)   | -1(1)  |
| N(1)  | 15(3) | 19(5)  | 24(4) | 4(3)   | 9(3)   | 2(3)   |
| N(2)  | 14(3) | 29(5)  | 28(4) | 7(3)   | 6(3)   | -3(3)  |
| N(3)  | 23(4) | 19(5)  | 25(4) | -1(3)  | 2(3)   | -3(3)  |
| N(4)  | 23(4) | 15(4)  | 30(4) | 1(3)   | 7(3)   | 2(3)   |
| N(5)  | 27(4) | 11(4)  | 33(4) | 4(3)   | 5(3)   | 3(3)   |
| N(6)  | 13(3) | 19(5)  | 30(4) | -3(3)  | 2(3)   | -2(3)  |
| C(1)  | 31(5) | 13(6)  | 35(5) | 1(4)   | 8(4)   | -2(4)  |
| C(2)  | 22(5) | 36(7)  | 34(5) | -8(5)  | 4(4)   | 9(5)   |
| C(3)  | 24(5) | 54(8)  | 34(6) | 0(5)   | 9(4)   | -8(5)  |
| C(4)  | 39(6) | 38(8)  | 57(7) | 1(6)   | 24(5)  | -15(5) |
| C(5)  | 31(5) | 45(8)  | 41(6) | 19(5)  | 4(4)   | -4(5)  |
| C(6)  | 24(5) | 30(7)  | 31(5) | -5(4)  | 11(4)  | 6(4)   |
| C(7)  | 17(4) | 27(6)  | 30(5) | 10(4)  | -3(4)  | 2(4)   |
| C(8)  | 16(4) | 46(8)  | 48(6) | 1(5)   | 3(4)   | -5(4)  |
| C(9)  | 31(5) | 60(8)  | 32(6) | 3(5)   | 0(4)   | -8(5)  |
| C(10) | 33(5) | 40(7)  | 34(6) | 0(5)   | 13(4)  | -1(5)  |
| C(11) | 45(6) | 76(9)  | 33(6) | -1(6)  | 6(4)   | 11(6)  |
| C(12) | 37(5) | 44(8)  | 57(7) | 17(5)  | 10(5)  | 14(5)  |
| C(13) | 22(5) | 36(7)  | 30(5) | 1(4)   | 15(4)  | 8(4)   |
| C(14) | 25(5) | 41(7)  | 22(5) | 12(4)  | 6(4)   | 2(5)   |
| C(15) | 30(5) | 49(8)  | 39(6) | -2(5)  | 16(4)  | 8(5)   |
| C(16) | 51(7) | 48(9)  | 49(7) | 10(6)  | 19(5)  | 24(6)  |
| C(17) | 55(6) | 33(7)  | 45(6) | -10(5) | 22(5)  | 8(6)   |
| C(18) | 34(5) | 24(6)  | 37(6) | -1(4)  | 22(4)  | 2(5)   |
| C(19) | 16(4) | 46(8)  | 43(6) | -6(5)  | -1(4)  | 2(5)   |
| C(20) | 20(5) | 52(8)  | 51(6) | 7(5)   | -2(4)  | 1(5)   |
| C(21) | 27(5) | 42(8)  | 48(6) | 4(5)   | 5(4)   | -2(5)  |
| C(22) | 43(6) | 40(8)  | 43(6) | -12(5) | 22(5)  | -4(5)  |
| C(23) | 98(8) | 55(9)  | 24(6) | -7(5)  | 5(5)   | 2(7)   |
| C(24) | 63(7) | 48(9)  | 78(8) | -26(7) | 19(6)  | -21(6) |
| C(25) | 27(4) | 26(6)  | 26(5) | -5(4)  | 4(4)   | 4(5)   |
| C(26) | 14(4) | 27(7)  | 37(5) | -1(4)  | 1(4)   | -6(4)  |
| C(27) | 30(5) | 34(7)  | 32(5) | 1(5)   | 5(4)   | 9(5)   |
| C(28) | 41(5) | 20(7)  | 57(6) | 7(5)   | 25(5)  | 12(5)  |
| C(29) | 49(6) | 37(8)  | 76(8) | -4(6)  | 33(6)  | 22(6)  |
| C(30) | 57(6) | 30(7)  | 76(8) | -9(6)  | 34(6)  | 18(6)  |
| C(31) | 40(6) | 34(7)  | 37(6) | -6(5)  | 9(4)   | -11(5) |
| C(32) | 32(5) | 29(7)  | 42(6) | -8(5)  | 17(4)  | 0(5)   |
| C(33) | 24(5) | 54(8)  | 51(6) | 1(5)   | 11(4)  | -4(5)  |
| C(34) | 34(5) | 46(8)  | 60(7) | 6(6)   | 5(5)   | -11(5) |
| C(35) | 44(6) | 20(7)  | 61(7) | -2(5)  | 18(5)  | -2(5)  |
| C(36) | 66(7) | 51(9)  | 80(9) | 3(7)   | 12(6)  | -10(6) |
| C(37) | 63(7) | 52(9)  | 64(8) | -9(6)  | 0(6)   | -15(6) |
| C(38) | 25(5) | 27(6)  | 25(5) | -1(4)  | 0(4)   | -9(4)  |
| C(39) | 22(5) | 34(7)  | 31(5) | 7(4)   | 1(4)   | -7(4)  |
| C(40) | 23(5) | 42(8)  | 54(7) | 2(5)   | 7(4)   | -12(5) |
| C(41) | 39(6) | 86(10) | 30(6) | -1(6)  | -10(4) | -12(6) |
| C(42) | 40(6) | 51(8)  | 34(6) | 2(5)   | 1(5)   | 4(5)   |
| C(43) | 23(5) | 32(7)  | 31(5) | 1(4)   | 9(4)   | 3(4)   |

# Supplementary Material (ESI) for Chemical Communications  
# This journal is © The Royal Society of Chemistry 2005

|         |          |            |           |           |           |           |
|---------|----------|------------|-----------|-----------|-----------|-----------|
| C (44)  | 24 (5)   | 39 (7)     | 31 (5)    | 5 (5)     | 4 (4)     | 4 (5)     |
| C (45)  | 24 (5)   | 35 (7)     | 48 (6)    | 19 (5)    | 3 (4)     | -6 (4)    |
| C (46)  | 45 (6)   | 72 (10)    | 51 (7)    | 16 (6)    | 8 (5)     | -2 (6)    |
| C (47)  | 39 (5)   | 32 (6)     | 24 (5)    | 0 (5)     | -1 (4)    | -5 (5)    |
| C (48)  | 71 (7)   | 79 (10)    | 36 (6)    | 4 (6)     | 9 (5)     | -13 (7)   |
| C (49)  | 54 (6)   | 75 (9)     | 17 (5)    | 5 (5)     | 12 (4)    | -3 (6)    |
| C (50)  | 39 (5)   | 15 (5)     | 19 (4)    | 3 (4)     | 1 (4)     | -6 (4)    |
| C (51)  | 25 (5)   | 27 (7)     | 39 (6)    | 2 (4)     | -2 (4)    | -14 (4)   |
| C (52)  | 22 (5)   | 27 (6)     | 29 (5)    | 5 (4)     | -1 (4)    | -3 (4)    |
| C (53)  | 23 (5)   | 51 (8)     | 48 (7)    | 10 (6)    | -1 (4)    | 2 (5)     |
| C (54)  | 37 (6)   | 71 (10)    | 51 (7)    | 14 (6)    | -14 (5)   | -13 (6)   |
| C (55)  | 37 (5)   | 80 (10)    | 39 (6)    | 0 (6)     | 0 (4)     | -8 (6)    |
| C (56)  | 29 (5)   | 57 (8)     | 25 (5)    | -6 (6)    | -4 (4)    | -19 (6)   |
| C (57)  | 18 (5)   | 51 (8)     | 35 (6)    | -4 (5)    | 1 (4)     | 6 (5)     |
| C (58)  | 28 (5)   | 51 (8)     | 67 (7)    | -2 (6)    | 10 (5)    | 7 (5)     |
| C (59)  | 35 (5)   | 43 (8)     | 54 (7)    | -14 (5)   | 13 (4)    | 0 (5)     |
| C (60)  | 42 (5)   | 36 (7)     | 33 (6)    | -11 (5)   | 7 (4)     | -8 (5)    |
| C (61)  | 72 (7)   | 87 (11)    | 56 (7)    | -34 (7)   | 29 (6)    | -16 (7)   |
| C (62)  | 59 (6)   | 76 (10)    | 51 (7)    | -18 (7)   | 21 (5)    | -11 (7)   |
| C (63)  | 23 (5)   | 28 (6)     | 18 (5)    | 1 (4)     | 6 (3)     | -10 (4)   |
| C (64)  | 17 (4)   | 40 (7)     | 31 (5)    | -3 (5)    | 4 (4)     | -8 (5)    |
| C (65)  | 30 (5)   | 38 (7)     | 37 (6)    | 0 (5)     | 13 (4)    | -1 (5)    |
| C (66)  | 40 (5)   | 34 (7)     | 41 (6)    | 9 (5)     | 14 (4)    | -7 (5)    |
| C (67)  | 39 (5)   | 36 (7)     | 37 (6)    | 10 (5)    | 0 (4)     | -3 (5)    |
| C (68)  | 25 (5)   | 37 (7)     | 34 (5)    | 8 (5)     | 8 (4)     | -7 (5)    |
| C (69)  | 23 (4)   | 19 (6)     | 38 (5)    | 6 (4)     | 9 (4)     | -5 (5)    |
| C (70)  | 30 (5)   | 49 (8)     | 37 (6)    | -1 (5)    | 18 (4)    | 14 (5)    |
| C (71)  | 38 (5)   | 31 (7)     | 46 (6)    | -5 (5)    | 15 (4)    | 2 (5)     |
| C (72)  | 28 (5)   | 41 (8)     | 42 (6)    | 5 (5)     | 16 (4)    | -2 (5)    |
| C (73)  | 56 (6)   | 36 (8)     | 61 (7)    | 4 (6)     | 9 (5)     | -1 (6)    |
| C (74)  | 45 (6)   | 49 (8)     | 60 (7)    | 13 (6)    | 9 (5)     | 3 (6)     |
| C (75)  | 27 (5)   | 36 (7)     | 16 (5)    | -4 (4)    | 14 (4)    | -7 (4)    |
| C (76)  | 126 (11) | 130 (16)   | 92 (11)   | -31 (10)  | 33 (9)    | -2 (11)   |
| C (77)  | 84 (10)  | 103 (14)   | 42 (7)    | -14 (8)   | 5 (6)     | -9 (11)   |
| C (78)  | 106 (11) | 88 (14)    | 42 (7)    | 10 (7)    | 12 (7)    | -25 (10)  |
| C (79)  | 105 (10) | 89 (13)    | 49 (7)    | 1 (8)     | -15 (7)   | 13 (11)   |
| C (80)  | 70 (9)   | 93 (15)    | 77 (9)    | 13 (9)    | -29 (7)   | -22 (9)   |
| C (81)  | 89 (10)  | 71 (13)    | 77 (10)   | -8 (8)    | 1 (7)     | -14 (9)   |
| C (82)  | 98 (10)  | 90 (13)    | 57 (8)    | -11 (8)   | 14 (7)    | -22 (10)  |
| C (83A) | 260 (50) | 470 (90)   | 300 (60)  | 70 (50)   | -190 (40) | -190 (50) |
| C (83B) | 230 (50) | 200 (60)   | 110 (40)  | 70 (40)   | 130 (40)  | 110 (40)  |
| C (84)  | 310 (50) | 2000 (300) | 35 (15)   | -170 (50) | 80 (20)   | -350 (80) |
| C (85)  | 160 (20) | 290 (40)   | 150 (20)  | -110 (20) | 17 (17)   | 0 (20)    |
| C (87)  | 200 (19) | 150 (20)   | 125 (18)  | -29 (14)  | 10 (14)   | 50 (16)   |
| C (88)  | 250 (30) | 190 (30)   | 260 (30)  | 160 (20)  | 180 (20)  | 140 (20)  |
| C (89)  | 220 (40) | 340 (50)   | 770 (110) | 140 (60)  | -310 (60) | -50 (30)  |
| C (90)  | 110 (20) | 180 (40)   | 180 (30)  | -60 (30)  | 70 (20)   | 30 (20)   |
| C (91)  | 120 (14) | 90 (16)    | 127 (15)  | -35 (11)  | -33 (11)  | -11 (11)  |
| C (92)  | 101 (12) | 132 (19)   | 123 (14)  | -23 (12)  | -20 (11)  | 32 (14)   |
| C (93)  | 141 (15) | 64 (13)    | 136 (15)  | -27 (11)  | -45 (12)  | -10 (11)  |
| C (94)  | 370 (40) | 270 (40)   | 97 (19)   | -40 (20)  | 140 (20)  | -20 (30)  |

---

Table 5. Hydrogen coordinates (  $\times 10^4$ ) and isotropic displacement parameters ( $\text{Å}^2 \times 10^3$ ) for [Sm(DippForm)<sub>3</sub>].5/2C<sub>7</sub>H<sub>8</sub>.

|        | x     | y    | z     | U (eq) |
|--------|-------|------|-------|--------|
| H(3)   | 11649 | 2457 | 8849  | 44     |
| H(4)   | 11286 | 2849 | 7792  | 52     |
| H(5)   | 9689  | 2845 | 7040  | 47     |
| H(7)   | 10101 | 1775 | 9456  | 30     |
| H(8A)  | 11859 | 1792 | 9250  | 55     |
| H(8B)  | 11702 | 1740 | 10191 | 55     |
| H(8C)  | 12017 | 2118 | 9867  | 55     |
| H(9A)  | 10487 | 2407 | 10388 | 62     |
| H(9B)  | 10309 | 2029 | 10779 | 62     |
| H(9C)  | 9400  | 2217 | 10218 | 62     |
| H(10)  | 7600  | 2266 | 7331  | 42     |
| H(11A) | 8530  | 2632 | 6093  | 77     |
| H(11B) | 7456  | 2432 | 5961  | 77     |
| H(11C) | 8488  | 2212 | 6171  | 77     |
| H(12A) | 7333  | 2841 | 7863  | 69     |
| H(12B) | 6765  | 2803 | 6961  | 69     |
| H(12C) | 7822  | 3013 | 7110  | 69     |
| H(15)  | 3679  | 2433 | 8764  | 46     |
| H(16)  | 4042  | 2893 | 9671  | 58     |
| H(17)  | 5646  | 2950 | 10366 | 52     |
| H(19)  | 5281  | 1725 | 8378  | 42     |
| H(20A) | 3521  | 1762 | 8583  | 62     |
| H(20B) | 3677  | 1643 | 7674  | 62     |
| H(20C) | 3353  | 2040 | 7852  | 62     |
| H(21A) | 4914  | 2303 | 7253  | 59     |
| H(21B) | 5061  | 1905 | 6968  | 59     |
| H(21C) | 5987  | 2109 | 7473  | 59     |
| H(22)  | 7772  | 2368 | 10279 | 49     |
| H(23A) | 6819  | 2807 | 11390 | 89     |
| H(23B) | 7912  | 2623 | 11586 | 89     |
| H(23C) | 6901  | 2386 | 11459 | 89     |
| H(24A) | 8027  | 2894 | 9564  | 93     |
| H(24B) | 8555  | 2929 | 10480 | 93     |
| H(24C) | 7483  | 3118 | 10219 | 93     |
| H(25)  | 7684  | 2434 | 8793  | 32     |
| H(28)  | 11440 | 920  | 7009  | 45     |
| H(29)  | 11322 | 322  | 6881  | 63     |
| H(30)  | 9847  | 32   | 7181  | 63     |
| H(32)  | 9861  | 1489 | 7971  | 40     |
| H(33A) | 11680 | 1422 | 7970  | 64     |
| H(33B) | 11256 | 1802 | 7677  | 64     |
| H(33C) | 11540 | 1518 | 7020  | 64     |
| H(34A) | 9828  | 1502 | 6235  | 70     |
| H(34B) | 9615  | 1838 | 6780  | 70     |
| H(34C) | 8838  | 1512 | 6720  | 70     |
| H(35)  | 7785  | 404  | 8123  | 49     |
| H(36A) | 7910  | -189 | 8476  | 98     |
| H(36B) | 8996  | -13  | 8753  | 98     |
| H(36C) | 8843  | -247 | 7943  | 98     |
| H(37A) | 7896  | -15  | 6702  | 90     |



# Supplementary Material (ESI) for Chemical Communications  
# This journal is © The Royal Society of Chemistry 2005

|         |       |       |       |     |
|---------|-------|-------|-------|-----|
| H (37B) | 7244  | 340   | 6737  | 90  |
| H (37C) | 6935  | -3    | 7219  | 90  |
| H (40)  | 3425  | 904   | 7131  | 47  |
| H (41)  | 3337  | 1076  | 5777  | 63  |
| H (42)  | 4786  | 1310  | 5276  | 50  |
| H (44)  | 5417  | 1046  | 8665  | 37  |
| H (45A) | 3597  | 1097  | 8607  | 54  |
| H (45B) | 4039  | 799   | 9234  | 54  |
| H (45C) | 3497  | 689   | 8356  | 54  |
| H (46A) | 5067  | 361   | 7990  | 84  |
| H (46B) | 5442  | 432   | 8930  | 84  |
| H (46C) | 6160  | 536   | 8244  | 84  |
| H (47)  | 7149  | 1513  | 6401  | 38  |
| H (48A) | 5797  | 1718  | 5008  | 92  |
| H (48B) | 6911  | 1879  | 5252  | 92  |
| H (48C) | 6017  | 1950  | 5817  | 92  |
| H (49A) | 6580  | 1102  | 4964  | 72  |
| H (49B) | 7399  | 987   | 5705  | 72  |
| H (49C) | 7641  | 1309  | 5127  | 72  |
| H (50)  | 7443  | 884   | 7001  | 30  |
| H (53)  | 11994 | 983   | 10913 | 49  |
| H (54)  | 12022 | 1224  | 12224 | 65  |
| H (55)  | 10594 | 1509  | 12589 | 63  |
| H (57)  | 10038 | 1083  | 9319  | 42  |
| H (58A) | 11845 | 1140  | 9363  | 72  |
| H (58B) | 11437 | 807   | 8829  | 72  |
| H (58C) | 11977 | 751   | 9735  | 72  |
| H (59A) | 10430 | 428   | 10148 | 65  |
| H (59B) | 10043 | 459   | 9198  | 65  |
| H (59C) | 9324  | 588   | 9863  | 65  |
| H (60)  | 8250  | 1660  | 11380 | 44  |
| H (61A) | 8483  | 2090  | 12434 | 105 |
| H (61B) | 9359  | 2127  | 11837 | 105 |
| H (61C) | 9605  | 1940  | 12705 | 105 |
| H (62A) | 8004  | 1184  | 12260 | 92  |
| H (62B) | 7718  | 1542  | 12694 | 92  |
| H (62C) | 8788  | 1353  | 12961 | 92  |
| H (65)  | 4030  | 1024  | 11096 | 41  |
| H (66)  | 4273  | 437   | 11472 | 45  |
| H (67)  | 5741  | 143   | 11186 | 45  |
| H (69)  | 5476  | 1526  | 9867  | 31  |
| H (70A) | 3704  | 1460  | 9934  | 57  |
| H (70B) | 4076  | 1852  | 10176 | 57  |
| H (70C) | 3850  | 1577  | 10871 | 57  |
| H (71A) | 6586  | 1638  | 11044 | 57  |
| H (71B) | 5640  | 1668  | 11574 | 57  |
| H (71C) | 5787  | 1955  | 10885 | 57  |
| H (72)  | 7732  | 471   | 10108 | 43  |
| H (73A) | 6723  | -171  | 10389 | 76  |
| H (73B) | 7646  | -118  | 9844  | 76  |
| H (73C) | 6544  | 41    | 9548  | 76  |
| H (74A) | 7662  | 103   | 11611 | 77  |
| H (74B) | 8243  | 470   | 11522 | 77  |
| H (74C) | 8632  | 121   | 11105 | 77  |
| H (75)  | 7999  | 1002  | 11018 | 30  |
| H (76A) | 3824  | -520  | 6718  | 172 |
| H (76B) | 3719  | -798  | 7434  | 172 |
| H (76C) | 3211  | -880  | 6529  | 172 |
| H (78)  | 4344  | -1468 | 6815  | 94  |
| H (79)  | 5868  | -1724 | 6525  | 99  |
| H (80)  | 7220  | -1385 | 6197  | 99  |

# Supplementary Material (ESI) for Chemical Communications  
# This journal is © The Royal Society of Chemistry 2005

|         |       |       |      |     |
|---------|-------|-------|------|-----|
| H (81)  | 7024  | -762  | 6126 | 95  |
| H (82)  | 5516  | -499  | 6430 | 98  |
| H (83A) | -1913 | -994  | 5403 | 535 |
| H (83B) | -1090 | -1266 | 5120 | 535 |
| H (83C) | -1576 | -972  | 4501 | 535 |
| H (83D) | 1504  | -270  | 4572 | 261 |
| H (83E) | 2134  | -161  | 5418 | 261 |
| H (83F) | 1042  | 13    | 5152 | 261 |
| H (85)  | 539   | -789  | 4584 | 240 |
| H (87)  | 1467  | -419  | 6758 | 190 |
| H (88)  | -127  | -761  | 7129 | 267 |
| H (89)  | -803  | -1095 | 5897 | 562 |
| H (90A) | 2716  | -2    | 5900 | 230 |
| H (90B) | 3086  | 397   | 6056 | 230 |
| H (90C) | 3564  | 89    | 6639 | 230 |
| H (92)  | 5169  | 451   | 5947 | 145 |
| H (93)  | 6497  | 321   | 5154 | 141 |

---

## Full data

### Compound 4:

Table 1. Crystal data and structure refinement for [Sm(F)(DippForm)<sub>2</sub>(THF)].

|                                   |                                                                                                                            |
|-----------------------------------|----------------------------------------------------------------------------------------------------------------------------|
| Identification code               | Sm(F)(DippForm) <sub>2</sub> (THF)]                                                                                        |
| Empirical formula                 | C <sub>54</sub> H <sub>78</sub> F N <sub>4</sub> O Sm                                                                      |
| Formula weight                    | 968.55                                                                                                                     |
| Temperature                       | 123(2) K                                                                                                                   |
| Wavelength                        | 0.71073 Å                                                                                                                  |
| Crystal system, space group       | Monoclinic, P2(1)/n                                                                                                        |
| Unit cell dimensions              | a = 20.4714(2) Å    alpha = 90 deg.<br>b = 12.1996(2) Å    beta = 110.0650(10) deg.<br>c = 21.6593(3) Å    gamma = 90 deg. |
| Volume                            | 5080.93(12) Å <sup>3</sup>                                                                                                 |
| Z, Calculated density             | 4, 1.266 Mg/m <sup>3</sup>                                                                                                 |
| Absorption coefficient            | 1.199 mm <sup>-1</sup>                                                                                                     |
| F(000)                            | 2036                                                                                                                       |
| Crystal size                      | 0.30 x 0.20 x 0.20 mm                                                                                                      |
| Theta range for data collection   | 3.28 to 28.24 deg.                                                                                                         |
| Limiting indices                  | -27<=h<=25, -11<=k<=16, -28<=l<=19                                                                                         |
| Reflections collected / unique    | 32459 / 12173 [R(int) = 0.0518]                                                                                            |
| Completeness to theta = 28.24     | 96.9 %                                                                                                                     |
| Absorption correction             | empirical                                                                                                                  |
| Max. and min. transmission        | 0.7954 and 0.7149                                                                                                          |
| Refinement method                 | Full-matrix least-squares on F <sup>2</sup>                                                                                |
| Data / restraints / parameters    | 12173 / 0 / 566                                                                                                            |
| Goodness-of-fit on F <sup>2</sup> | 1.044                                                                                                                      |
| Final R indices [I>2sigma(I)]     | R1 = 0.0605, wR2 = 0.1572                                                                                                  |
| R indices (all data)              | R1 = 0.0674, wR2 = 0.1654                                                                                                  |
| Largest diff. peak and hole       | 3.806 and -5.153 e.Å <sup>-3</sup>                                                                                         |

Note: All hydrogen atoms placed in calculated positions (riding model).

Table 2. Atomic coordinates ( $\times 10^4$ ) and equivalent isotropic displacement parameters ( $\text{Å}^2 \times 10^3$ ) for  $[\text{Sm}(\text{F}(\text{DippForm})_2(\text{THF}))]$ .  $U(\text{eq})$  is defined as one third of the trace of the orthogonalized  $U_{ij}$  tensor.

|       | x       | y        | z       | U (eq) |
|-------|---------|----------|---------|--------|
| Sm(1) | 5687(1) | 6010(1)  | 2647(1) | 18(1)  |
| F(1)  | 6691(1) | 5446(2)  | 2776(1) | 33(1)  |
| O(1)  | 6217(1) | 7789(2)  | 2571(1) | 29(1)  |
| N(1)  | 4850(1) | 4719(2)  | 1939(1) | 21(1)  |
| N(2)  | 5101(1) | 6251(2)  | 1459(1) | 20(1)  |
| N(3)  | 5177(1) | 7004(2)  | 3351(1) | 20(1)  |
| N(4)  | 5551(1) | 5248(2)  | 3644(1) | 20(1)  |
| C(1)  | 4524(2) | 3672(3)  | 1881(2) | 22(1)  |
| C(2)  | 4921(2) | 2761(3)  | 2200(2) | 25(1)  |
| C(3)  | 4598(2) | 1747(3)  | 2157(2) | 31(1)  |
| C(4)  | 3893(2) | 1627(3)  | 1813(2) | 34(1)  |
| C(5)  | 3503(2) | 2522(3)  | 1509(2) | 33(1)  |
| C(6)  | 3801(2) | 3554(3)  | 1541(2) | 26(1)  |
| C(7)  | 5701(2) | 2878(3)  | 2563(2) | 32(1)  |
| C(8)  | 5993(2) | 2035(3)  | 3116(2) | 40(1)  |
| C(9)  | 6096(2) | 2821(4)  | 2088(2) | 44(1)  |
| C(10) | 3348(2) | 4534(3)  | 1261(2) | 36(1)  |
| C(11) | 3171(3) | 5114(4)  | 1800(3) | 67(2)  |
| C(12) | 2682(2) | 4265(5)  | 696(2)  | 49(1)  |
| C(13) | 5215(2) | 6743(2)  | 907(2)  | 21(1)  |
| C(14) | 4806(2) | 7643(3)  | 595(2)  | 25(1)  |
| C(15) | 4919(2) | 8121(3)  | 54(2)   | 32(1)  |
| C(16) | 5432(2) | 7730(3)  | -174(2) | 33(1)  |
| C(17) | 5847(2) | 6871(3)  | 149(2)  | 29(1)  |
| C(18) | 5759(2) | 6376(3)  | 696(2)  | 23(1)  |
| C(19) | 4226(2) | 8070(3)  | 828(2)  | 26(1)  |
| C(20) | 4136(2) | 9311(3)  | 761(2)  | 39(1)  |
| C(21) | 3543(2) | 7487(3)  | 472(2)  | 33(1)  |
| C(22) | 6255(2) | 5461(3)  | 1048(2) | 25(1)  |
| C(23) | 7015(2) | 5840(3)  | 1274(2) | 35(1)  |
| C(24) | 6158(2) | 4439(3)  | 616(2)  | 34(1)  |
| C(25) | 4857(2) | 5223(2)  | 1402(2) | 21(1)  |
| C(26) | 4977(2) | 8039(3)  | 3532(2) | 23(1)  |
| C(27) | 4282(2) | 8391(3)  | 3237(2) | 32(1)  |
| C(28) | 4094(2) | 9420(4)  | 3414(2) | 47(1)  |
| C(29) | 4576(2) | 10076(3) | 3860(3) | 48(1)  |
| C(30) | 5256(2) | 9751(3)  | 4128(2) | 41(1)  |
| C(31) | 5473(2) | 8727(3)  | 3965(2) | 28(1)  |
| C(32) | 3732(2) | 7681(3)  | 2758(2) | 38(1)  |
| C(33) | 3310(3) | 8323(4)  | 2138(2) | 52(1)  |
| C(34) | 3241(3) | 7208(4)  | 3078(3) | 57(1)  |
| C(35) | 6239(2) | 8428(3)  | 4251(2) | 29(1)  |
| C(36) | 6699(2) | 9311(4)  | 4115(2) | 39(1)  |
| C(37) | 6456(2) | 8197(3)  | 4984(2) | 37(1)  |
| C(38) | 5626(2) | 4333(3)  | 4072(2) | 21(1)  |
| C(39) | 6297(2) | 3929(2)  | 4419(2) | 24(1)  |
| C(40) | 6369(2) | 3055(3)  | 4850(2) | 29(1)  |
| C(41) | 5797(2) | 2569(3)  | 4936(2) | 30(1)  |
| C(42) | 5137(2) | 2938(3)  | 4568(2) | 27(1)  |
| C(43) | 5035(2) | 3813(3)  | 4128(2) | 23(1)  |
| C(44) | 6931(2) | 4452(3)  | 4324(2) | 29(1)  |

# Supplementary Material (ESI) for Chemical Communications  
# This journal is © The Royal Society of Chemistry 2005

|        |          |          |          |        |
|--------|----------|----------|----------|--------|
| C (45) | 7571 (2) | 3704 (4) | 4506 (2) | 39 (1) |
| C (46) | 7128 (2) | 5528 (3) | 4698 (3) | 45 (1) |
| C (47) | 4296 (2) | 4148 (3) | 3723 (2) | 25 (1) |
| C (48) | 3864 (2) | 3170 (3) | 3353 (2) | 32 (1) |
| C (49) | 3931 (2) | 4694 (3) | 4153 (2) | 34 (1) |
| C (50) | 5288 (2) | 6173 (2) | 3773 (2) | 20 (1) |
| C (51) | 5803 (2) | 8744 (3) | 2270 (2) | 36 (1) |
| C (52) | 6279 (3) | 9475 (4) | 2050 (3) | 55 (1) |
| C (53) | 6867 (3) | 8742 (4) | 2041 (3) | 54 (1) |
| C (54) | 6934 (2) | 7958 (3) | 2605 (2) | 35 (1) |

---

Table 3. Bond lengths [Å] and angles [deg] for  
[Sm(F) (DippForm) 2 (THF) ] .

---

|             |          |
|-------------|----------|
| Sm(1)-F(1)  | 2.093(2) |
| Sm(1)-N(1)  | 2.443(3) |
| Sm(1)-N(3)  | 2.446(3) |
| Sm(1)-N(4)  | 2.454(3) |
| Sm(1)-N(2)  | 2.454(3) |
| Sm(1)-O(1)  | 2.457(2) |
| Sm(1)-C(25) | 2.817(3) |
| Sm(1)-C(50) | 2.833(3) |
| O(1)-C(51)  | 1.457(5) |
| O(1)-C(54)  | 1.457(4) |
| N(1)-C(25)  | 1.320(4) |
| N(1)-C(1)   | 1.426(4) |
| N(2)-C(25)  | 1.340(4) |
| N(2)-C(13)  | 1.426(4) |
| N(3)-C(50)  | 1.332(4) |
| N(3)-C(26)  | 1.423(4) |
| N(4)-C(50)  | 1.321(4) |
| N(4)-C(38)  | 1.424(4) |
| C(1)-C(2)   | 1.410(5) |
| C(1)-C(6)   | 1.416(4) |
| C(2)-C(3)   | 1.391(5) |
| C(2)-C(7)   | 1.525(5) |
| C(3)-C(4)   | 1.386(6) |
| C(4)-C(5)   | 1.379(6) |
| C(5)-C(6)   | 1.391(5) |
| C(6)-C(10)  | 1.508(5) |
| C(7)-C(9)   | 1.513(6) |
| C(7)-C(8)   | 1.535(5) |
| C(10)-C(11) | 1.511(7) |
| C(10)-C(12) | 1.522(6) |
| C(13)-C(14) | 1.406(4) |
| C(13)-C(18) | 1.413(4) |
| C(14)-C(15) | 1.397(5) |
| C(14)-C(19) | 1.532(5) |
| C(15)-C(16) | 1.388(6) |
| C(16)-C(17) | 1.379(5) |
| C(17)-C(18) | 1.397(5) |
| C(18)-C(22) | 1.526(5) |
| C(19)-C(21) | 1.522(5) |
| C(19)-C(20) | 1.527(5) |
| C(22)-C(24) | 1.531(5) |
| C(22)-C(23) | 1.533(5) |
| C(26)-C(31) | 1.401(5) |
| C(26)-C(27) | 1.412(5) |
| C(27)-C(28) | 1.404(5) |
| C(27)-C(32) | 1.514(5) |
| C(28)-C(29) | 1.376(6) |
| C(29)-C(30) | 1.371(6) |
| C(30)-C(31) | 1.410(5) |
| C(31)-C(35) | 1.520(5) |
| C(32)-C(34) | 1.519(7) |
| C(32)-C(33) | 1.538(6) |
| C(35)-C(37) | 1.521(6) |
| C(35)-C(36) | 1.525(5) |
| C(38)-C(43) | 1.408(5) |
| C(38)-C(39) | 1.411(5) |

# Supplementary Material (ESI) for Chemical Communications  
# This journal is © The Royal Society of Chemistry 2005

|                |           |
|----------------|-----------|
| C (39) -C (40) | 1.391 (5) |
| C (39) -C (44) | 1.522 (5) |
| C (40) -C (41) | 1.381 (5) |
| C (41) -C (42) | 1.387 (5) |
| C (42) -C (43) | 1.398 (5) |
| C (43) -C (47) | 1.521 (5) |
| C (44) -C (46) | 1.522 (5) |
| C (44) -C (45) | 1.532 (5) |
| C (47) -C (49) | 1.532 (5) |
| C (47) -C (48) | 1.536 (5) |
| C (51) -C (52) | 1.515 (6) |
| C (52) -C (53) | 1.504 (7) |
| C (53) -C (54) | 1.522 (6) |

|                        |            |
|------------------------|------------|
| F (1) -Sm (1) -N (1)   | 108.51 (9) |
| F (1) -Sm (1) -N (3)   | 133.59 (9) |
| N (1) -Sm (1) -N (3)   | 110.68 (9) |
| F (1) -Sm (1) -N (4)   | 99.23 (8)  |
| N (1) -Sm (1) -N (4)   | 92.35 (9)  |
| N (3) -Sm (1) -N (4)   | 55.75 (8)  |
| F (1) -Sm (1) -N (2)   | 106.53 (9) |
| N (1) -Sm (1) -N (2)   | 55.55 (9)  |
| N (3) -Sm (1) -N (2)   | 115.71 (9) |
| N (4) -Sm (1) -N (2)   | 143.67 (9) |
| F (1) -Sm (1) -O (1)   | 82.16 (8)  |
| N (1) -Sm (1) -O (1)   | 139.35 (9) |
| N (3) -Sm (1) -O (1)   | 84.05 (8)  |
| N (4) -Sm (1) -O (1)   | 125.41 (8) |
| N (2) -Sm (1) -O (1)   | 83.82 (9)  |
| F (1) -Sm (1) -C (25)  | 105.01 (9) |
| N (1) -Sm (1) -C (25)  | 27.92 (9)  |
| N (3) -Sm (1) -C (25)  | 121.24 (9) |
| N (4) -Sm (1) -C (25)  | 119.99 (9) |
| N (2) -Sm (1) -C (25)  | 28.41 (9)  |
| O (1) -Sm (1) -C (25)  | 111.87 (9) |
| F (1) -Sm (1) -C (50)  | 117.89 (9) |
| N (1) -Sm (1) -C (50)  | 103.78 (9) |
| N (3) -Sm (1) -C (50)  | 28.01 (9)  |
| N (4) -Sm (1) -C (50)  | 27.77 (8)  |
| N (2) -Sm (1) -C (50)  | 135.41 (9) |
| O (1) -Sm (1) -C (50)  | 105.05 (8) |
| C (25) -Sm (1) -C (50) | 126.18 (9) |
| C (51) -O (1) -C (54)  | 109.4 (3)  |
| C (51) -O (1) -Sm (1)  | 122.2 (2)  |
| C (54) -O (1) -Sm (1)  | 125.5 (2)  |
| C (25) -N (1) -C (1)   | 119.1 (3)  |
| C (25) -N (1) -Sm (1)  | 92.01 (18) |
| C (1) -N (1) -Sm (1)   | 147.0 (2)  |
| C (25) -N (2) -C (13)  | 118.6 (3)  |
| C (25) -N (2) -Sm (1)  | 91.00 (19) |
| C (13) -N (2) -Sm (1)  | 140.1 (2)  |
| C (50) -N (3) -C (26)  | 119.0 (3)  |
| C (50) -N (3) -Sm (1)  | 92.37 (19) |
| C (26) -N (3) -Sm (1)  | 146.7 (2)  |
| C (50) -N (4) -C (38)  | 119.5 (3)  |
| C (50) -N (4) -Sm (1)  | 92.29 (19) |
| C (38) -N (4) -Sm (1)  | 148.2 (2)  |
| C (2) -C (1) -C (6)    | 119.9 (3)  |
| C (2) -C (1) -N (1)    | 119.3 (3)  |
| C (6) -C (1) -N (1)    | 120.7 (3)  |
| C (3) -C (2) -C (1)    | 119.2 (3)  |

# Supplementary Material (ESI) for Chemical Communications  
# This journal is © The Royal Society of Chemistry 2005

|                        |            |
|------------------------|------------|
| C (3) -C (2) -C (7)    | 120.5 (3)  |
| C (1) -C (2) -C (7)    | 120.3 (3)  |
| C (4) -C (3) -C (2)    | 120.9 (3)  |
| C (5) -C (4) -C (3)    | 120.0 (3)  |
| C (4) -C (5) -C (6)    | 121.3 (3)  |
| C (5) -C (6) -C (1)    | 118.7 (3)  |
| C (5) -C (6) -C (10)   | 119.9 (3)  |
| C (1) -C (6) -C (10)   | 121.2 (3)  |
| C (9) -C (7) -C (2)    | 110.7 (3)  |
| C (9) -C (7) -C (8)    | 110.0 (3)  |
| C (2) -C (7) -C (8)    | 113.5 (3)  |
| C (6) -C (10) -C (11)  | 109.7 (3)  |
| C (6) -C (10) -C (12)  | 114.2 (3)  |
| C (11) -C (10) -C (12) | 109.7 (4)  |
| C (14) -C (13) -C (18) | 119.7 (3)  |
| C (14) -C (13) -N (2)  | 119.4 (3)  |
| C (18) -C (13) -N (2)  | 120.8 (3)  |
| C (15) -C (14) -C (13) | 119.2 (3)  |
|                        |            |
| C (15) -C (14) -C (19) | 120.3 (3)  |
| C (13) -C (14) -C (19) | 120.5 (3)  |
| C (16) -C (15) -C (14) | 121.2 (3)  |
| C (17) -C (16) -C (15) | 119.5 (3)  |
| C (16) -C (17) -C (18) | 121.4 (3)  |
| C (17) -C (18) -C (13) | 119.0 (3)  |
| C (17) -C (18) -C (22) | 118.8 (3)  |
| C (13) -C (18) -C (22) | 122.2 (3)  |
| C (21) -C (19) -C (20) | 110.8 (3)  |
| C (21) -C (19) -C (14) | 110.9 (3)  |
| C (20) -C (19) -C (14) | 112.9 (3)  |
| C (18) -C (22) -C (24) | 111.5 (3)  |
| C (18) -C (22) -C (23) | 111.6 (3)  |
| C (24) -C (22) -C (23) | 110.3 (3)  |
| N (1) -C (25) -N (2)   | 118.1 (3)  |
| N (1) -C (25) -Sm (1)  | 60.06 (16) |
| N (2) -C (25) -Sm (1)  | 60.59 (17) |
| C (31) -C (26) -C (27) | 120.4 (3)  |
| C (31) -C (26) -N (3)  | 120.4 (3)  |
| C (27) -C (26) -N (3)  | 119.1 (3)  |
| C (28) -C (27) -C (26) | 118.5 (3)  |
| C (28) -C (27) -C (32) | 119.3 (3)  |
| C (26) -C (27) -C (32) | 122.2 (3)  |
| C (29) -C (28) -C (27) | 121.0 (4)  |
| C (28) -C (29) -C (30) | 120.5 (4)  |
| C (29) -C (30) -C (31) | 120.8 (4)  |
| C (26) -C (31) -C (30) | 118.7 (3)  |
| C (26) -C (31) -C (35) | 122.6 (3)  |
| C (30) -C (31) -C (35) | 118.7 (3)  |
| C (27) -C (32) -C (34) | 110.9 (4)  |
| C (27) -C (32) -C (33) | 111.8 (4)  |
| C (34) -C (32) -C (33) | 109.3 (4)  |
| C (31) -C (35) -C (37) | 111.2 (3)  |
| C (31) -C (35) -C (36) | 111.8 (3)  |
| C (37) -C (35) -C (36) | 110.7 (3)  |
| C (43) -C (38) -C (39) | 120.4 (3)  |
| C (43) -C (38) -N (4)  | 120.4 (3)  |
| C (39) -C (38) -N (4)  | 119.2 (3)  |
| C (40) -C (39) -C (38) | 119.0 (3)  |
| C (40) -C (39) -C (44) | 120.9 (3)  |
| C (38) -C (39) -C (44) | 120.1 (3)  |
| C (41) -C (40) -C (39) | 121.4 (3)  |



# Supplementary Material (ESI) for Chemical Communications  
# This journal is © The Royal Society of Chemistry 2005

|                        |            |
|------------------------|------------|
| C (40) -C (41) -C (42) | 119.1 (3)  |
| C (41) -C (42) -C (43) | 121.9 (3)  |
| C (42) -C (43) -C (38) | 118.1 (3)  |
| C (42) -C (43) -C (47) | 119.0 (3)  |
|                        |            |
| C (38) -C (43) -C (47) | 122.9 (3)  |
| C (46) -C (44) -C (39) | 111.8 (3)  |
| C (46) -C (44) -C (45) | 109.3 (3)  |
| C (39) -C (44) -C (45) | 114.0 (3)  |
| C (43) -C (47) -C (49) | 111.2 (3)  |
| C (43) -C (47) -C (48) | 111.9 (3)  |
| C (49) -C (47) -C (48) | 110.0 (3)  |
| N (4) -C (50) -N (3)   | 119.5 (3)  |
| N (4) -C (50) -Sm (1)  | 59.94 (17) |
| N (3) -C (50) -Sm (1)  | 59.62 (17) |
| O (1) -C (51) -C (52)  | 105.8 (3)  |
| C (53) -C (52) -C (51) | 104.9 (4)  |
| C (52) -C (53) -C (54) | 102.5 (4)  |
| O (1) -C (54) -C (53)  | 103.6 (3)  |

---

Symmetry transformations used to generate equivalent atoms:

Table 4. Anisotropic displacement parameters ( $\text{Å}^2 \times 10^3$ ) for  
 [Sm(F) (DippForm)<sub>2</sub> (THF)].

The anisotropic displacement factor exponent takes the form:  
 $-2 \pi^2 [ h^2 a^2 U_{11} + \dots + 2 h k a^* b^* U_{12} ]$

|       | U11   | U22   | U33   | U23    | U13    | U12    |
|-------|-------|-------|-------|--------|--------|--------|
| Sm(1) | 18(1) | 16(1) | 18(1) | -2(1)  | 3(1)   | -2(1)  |
| F(1)  | 27(1) | 36(1) | 35(1) | 4(1)   | 10(1)  | 6(1)   |
| O(1)  | 27(1) | 23(1) | 35(1) | -2(1)  | 10(1)  | -6(1)  |
| N(1)  | 22(1) | 17(1) | 20(1) | 0(1)   | 3(1)   | -2(1)  |
| N(2)  | 20(1) | 14(1) | 23(1) | 0(1)   | 5(1)   | 0(1)   |
| N(3)  | 21(1) | 15(1) | 22(1) | -1(1)  | 5(1)   | 1(1)   |
| N(4)  | 21(1) | 16(1) | 21(1) | -1(1)  | 5(1)   | 0(1)   |
| C(1)  | 27(2) | 16(1) | 21(2) | -4(1)  | 6(1)   | -6(1)  |
| C(2)  | 32(2) | 19(1) | 23(2) | -1(1)  | 7(1)   | 2(1)   |
| C(3)  | 44(2) | 18(2) | 33(2) | -1(1)  | 14(2)  | 0(1)   |
| C(4)  | 46(2) | 22(2) | 37(2) | -7(1)  | 16(2)  | -13(2) |
| C(5)  | 31(2) | 32(2) | 32(2) | -5(2)  | 5(2)   | -13(2) |
| C(6)  | 26(2) | 27(2) | 23(2) | 0(1)   | 4(1)   | -5(1)  |
| C(7)  | 32(2) | 18(2) | 39(2) | 2(1)   | 5(2)   | 4(1)   |
| C(8)  | 45(2) | 27(2) | 33(2) | -1(2)  | -6(2)  | 9(2)   |
| C(9)  | 37(2) | 35(2) | 58(3) | 8(2)   | 15(2)  | 8(2)   |
| C(10) | 25(2) | 29(2) | 42(2) | 12(2)  | -4(2)  | -7(1)  |
| C(11) | 84(4) | 40(2) | 48(3) | -16(2) | -16(3) | 30(3)  |
| C(12) | 39(2) | 67(3) | 31(2) | -2(2)  | 0(2)   | 8(2)   |
| C(13) | 25(2) | 16(1) | 19(1) | -2(1)  | 4(1)   | -4(1)  |
| C(14) | 28(2) | 21(2) | 22(2) | -2(1)  | 4(1)   | -3(1)  |
| C(15) | 39(2) | 24(2) | 29(2) | 8(1)   | 8(2)   | 3(1)   |
| C(16) | 43(2) | 31(2) | 25(2) | 5(1)   | 12(2)  | -5(2)  |
| C(17) | 32(2) | 30(2) | 26(2) | -1(1)  | 11(1)  | -3(1)  |
| C(18) | 27(2) | 18(1) | 20(2) | -2(1)  | 5(1)   | -3(1)  |
| C(19) | 29(2) | 21(2) | 26(2) | -1(1)  | 4(1)   | 4(1)   |
| C(20) | 44(2) | 24(2) | 44(2) | -1(2)  | 10(2)  | 7(2)   |
| C(21) | 29(2) | 31(2) | 36(2) | -2(2)  | 7(2)   | 3(1)   |
| C(22) | 26(2) | 25(2) | 22(2) | -2(1)  | 6(1)   | 2(1)   |
| C(23) | 25(2) | 34(2) | 39(2) | -8(2)  | 5(2)   | 1(1)   |
| C(24) | 41(2) | 25(2) | 32(2) | -4(1)  | 6(2)   | 3(2)   |
| C(25) | 20(1) | 19(1) | 20(1) | -4(1)  | 1(1)   | 2(1)   |
| C(26) | 27(2) | 17(1) | 26(2) | -2(1)  | 8(1)   | 0(1)   |
| C(27) | 26(2) | 25(2) | 37(2) | -7(1)  | 3(2)   | 5(1)   |
| C(28) | 37(2) | 34(2) | 61(3) | -11(2) | 4(2)   | 17(2)  |
| C(29) | 49(2) | 25(2) | 63(3) | -16(2) | 11(2)  | 10(2)  |
| C(30) | 40(2) | 21(2) | 56(3) | -15(2) | 9(2)   | -3(2)  |
| C(31) | 29(2) | 18(1) | 38(2) | -6(1)  | 11(2)  | -2(1)  |
| C(32) | 27(2) | 36(2) | 41(2) | -12(2) | 1(2)   | 6(2)   |
| C(33) | 52(3) | 63(3) | 34(2) | 2(2)   | 6(2)   | -1(2)  |
| C(34) | 72(3) | 44(3) | 45(3) | 3(2)   | 8(2)   | -24(2) |
| C(35) | 27(2) | 23(2) | 35(2) | -9(1)  | 9(1)   | -7(1)  |
| C(36) | 38(2) | 46(2) | 29(2) | -3(2)  | 8(2)   | -18(2) |
| C(37) | 33(2) | 36(2) | 43(2) | 9(2)   | 14(2)  | 1(2)   |
| C(38) | 28(2) | 14(1) | 17(1) | -3(1)  | 4(1)   | 2(1)   |
| C(39) | 26(2) | 20(2) | 21(2) | -2(1)  | 3(1)   | 1(1)   |
| C(40) | 34(2) | 24(2) | 22(2) | 0(1)   | 1(1)   | 4(1)   |
| C(41) | 42(2) | 18(2) | 24(2) | 1(1)   | 5(1)   | 1(1)   |
| C(42) | 35(2) | 21(2) | 24(2) | -2(1)  | 9(1)   | -6(1)  |
| C(43) | 26(2) | 18(1) | 22(2) | -2(1)  | 4(1)   | 1(1)   |

# Supplementary Material (ESI) for Chemical Communications  
# This journal is © The Royal Society of Chemistry 2005

|        |        |        |        |        |        |        |
|--------|--------|--------|--------|--------|--------|--------|
| C (44) | 25 (2) | 29 (2) | 31 (2) | 2 (1)  | 6 (1)  | 4 (1)  |
| C (45) | 30 (2) | 39 (2) | 41 (2) | -1 (2) | 5 (2)  | 7 (2)  |
| C (46) | 31 (2) | 34 (2) | 66 (3) | -7 (2) | 14 (2) | -4 (2) |
| C (47) | 24 (2) | 22 (2) | 26 (2) | 2 (1)  | 6 (1)  | -1 (1) |
| C (48) | 29 (2) | 34 (2) | 31 (2) | -4 (2) | 8 (1)  | -7 (1) |
| C (49) | 33 (2) | 27 (2) | 44 (2) | -4 (2) | 15 (2) | 2 (1)  |
| C (50) | 21 (2) | 17 (1) | 20 (2) | -1 (1) | 4 (1)  | -3 (1) |
| C (51) | 37 (2) | 25 (2) | 37 (2) | 0 (2)  | 3 (2)  | -2 (2) |
| C (52) | 69 (3) | 32 (2) | 67 (3) | 14 (2) | 27 (3) | 0 (2)  |
| C (53) | 70 (3) | 38 (2) | 71 (4) | 5 (2)  | 48 (3) | -7 (2) |
| C (54) | 31 (2) | 33 (2) | 44 (2) | -4 (2) | 16 (2) | -9 (2) |

---

Table 5. Hydrogen coordinates (  $\times 10^4$ ) and isotropic displacement parameters ( $\text{Å}^2 \times 10^3$ ) for [Sm(F)(DippForm)<sub>2</sub>(THF)].

|        | x    | y     | z    | U (eq) |
|--------|------|-------|------|--------|
| H(3)   | 4864 | 1128  | 2365 | 38     |
| H(4)   | 3679 | 930   | 1786 | 41     |
| H(5)   | 3020 | 2431  | 1274 | 40     |
| H(7)   | 5782 | 3622  | 2769 | 38     |
| H(8A)  | 5972 | 1302  | 2925 | 60     |
| H(8B)  | 5717 | 2048  | 3406 | 60     |
| H(8C)  | 6478 | 2217  | 3369 | 60     |
| H(9A)  | 6032 | 2095  | 1882 | 66     |
| H(9B)  | 6592 | 2946  | 2327 | 66     |
| H(9C)  | 5921 | 3383  | 1749 | 66     |
| H(10)  | 3623 | 5054  | 1090 | 44     |
| H(11A) | 2844 | 4667  | 1932 | 101    |
| H(11B) | 2959 | 5825  | 1638 | 101    |
| H(11C) | 3597 | 5227  | 2179 | 101    |
| H(12A) | 2788 | 3763  | 390  | 73     |
| H(12B) | 2480 | 4941  | 465  | 73     |
| H(12C) | 2349 | 3917  | 870  | 73     |
| H(15)  | 4641 | 8725  | -161 | 38     |
| H(16)  | 5496 | 8052  | -548 | 40     |
| H(17)  | 6202 | 6611  | -5   | 35     |
| H(19)  | 4360 | 7889  | 1305 | 32     |
| H(20A) | 4581 | 9670  | 993  | 58     |
| H(20B) | 3790 | 9547  | 953  | 58     |
| H(20C) | 3978 | 9514  | 295  | 58     |
| H(21A) | 3408 | 7617  | -1   | 50     |
| H(21B) | 3181 | 7769  | 631  | 50     |
| H(21C) | 3600 | 6698  | 559  | 50     |
| H(22)  | 6144 | 5256  | 1448 | 30     |
| H(23A) | 7152 | 5978  | 890  | 52     |
| H(23B) | 7314 | 5270  | 1547 | 52     |
| H(23C) | 7065 | 6516  | 1531 | 52     |
| H(24A) | 5670 | 4208  | 472  | 51     |
| H(24B) | 6453 | 3847  | 868  | 51     |
| H(24C) | 6287 | 4606  | 230  | 51     |
| H(25)  | 4692 | 4868  | 987  | 25     |
| H(28)  | 3628 | 9667  | 3223 | 56     |
| H(29)  | 4436 | 10761 | 3983 | 58     |
| H(30)  | 5585 | 10220 | 4427 | 49     |
| H(32)  | 3971 | 7059  | 2622 | 45     |
| H(33A) | 3005 | 8848  | 2249 | 78     |
| H(33B) | 3027 | 7811  | 1804 | 78     |
| H(33C) | 3628 | 8717  | 1966 | 78     |
| H(34A) | 3501 | 6732  | 3444 | 86     |
| H(34B) | 2877 | 6781  | 2754 | 86     |
| H(34C) | 3026 | 7806  | 3243 | 86     |
| H(35)  | 6309 | 7739  | 4031 | 34     |
| H(36A) | 6559 | 9435  | 3640 | 58     |
| H(36B) | 7186 | 9073  | 4285 | 58     |
| H(36C) | 6649 | 9994  | 4333 | 58     |
| H(37A) | 6348 | 8834  | 5208 | 56     |
| H(37B) | 6957 | 8051  | 5161 | 56     |

# Supplementary Material (ESI) for Chemical Communications  
# This journal is © The Royal Society of Chemistry 2005

|         |      |       |      |    |
|---------|------|-------|------|----|
| H (37C) | 6202 | 7556  | 5056 | 56 |
| H (40)  | 6820 | 2787  | 5090 | 34 |
| H (41)  | 5854 | 1989  | 5243 | 35 |
| H (42)  | 4743 | 2587  | 4617 | 32 |
| H (44)  | 6802 | 4628  | 3846 | 35 |
| H (45A) | 7925 | 4035  | 4355 | 58 |
| H (45B) | 7437 | 2987  | 4296 | 58 |
| H (45C) | 7759 | 3611  | 4985 | 58 |
| H (46A) | 6721 | 6012  | 4579 | 67 |
| H (46B) | 7501 | 5883  | 4584 | 67 |
| H (46C) | 7288 | 5383  | 5172 | 67 |
| H (47)  | 4322 | 4696  | 3389 | 30 |
| H (48A) | 4103 | 2822  | 3081 | 47 |
| H (48B) | 3405 | 3426  | 3071 | 47 |
| H (48C) | 3810 | 2636  | 3670 | 47 |
| H (49A) | 3880 | 4162  | 4472 | 51 |
| H (49B) | 3470 | 4952  | 3875 | 51 |
| H (49C) | 4209 | 5317  | 4386 | 51 |
| H (50)  | 5180 | 6245  | 4164 | 24 |
| H (51A) | 5639 | 9130  | 2592 | 43 |
| H (51B) | 5393 | 8523  | 1890 | 43 |
| H (52A) | 6032 | 9778  | 1607 | 67 |
| H (52B) | 6455 | 10090 | 2361 | 67 |
| H (53A) | 7300 | 9164  | 2118 | 64 |
| H (53B) | 6750 | 8345  | 1618 | 64 |
| H (54A) | 7150 | 7258  | 2546 | 42 |
| H (54B) | 7216 | 8285  | 3032 | 42 |

---
